# Supplementary material for: Distinct Cellular Tools of Mild Hyperthermia-Induced Acquired Stress Tolerance in Chinese Hamster Ovary Cells
Source: Biomedicines. 2022 May 19;10(5):1172. doi: 10.3390/biomedicines10051172 (PMC9138356; doi:10.3390/biomedicines10051172)
Supplement: Supplementary file 1 [file biomedicines-10-01172-s001.zip › biomedicines-1701648-supplementary tables.xlsx]

## Sheet: Table_S1_RNAseq_DiffExp_genes
Table S1. Significantly changing mRNAs					40 °C, 1 h compared to 37 °C		40 °C, 6 h compared to 37 °C		42.5 °C, 1 h compared to 37 °C		37 °C				40 °C, 1 h					40 °C, 6 h					42.5 °C, 1 h
Name (Chinese hamster)	Identifier (Chinese hamster)	Significant in 40 °C, 1 h compared to 37 °C	Significant in 40 °C, 6 h compared to 37 °C	Significant in 42.5 °C, 1 h compared to 37 °C	Fold change	FDR p-value	Fold change	FDR p-value	Fold change	FDR p-value	Total counts	Total counts	Total counts	Mean	Total counts	Total counts	Total counts	Total counts	Mean	Total counts	Total counts	Total counts	Total counts	Mean	Total counts	Total counts	Total counts	Total counts	Mean
Cep295nl	ENSCGRG00001014121	SIGN	SIGN	SIGN	1.77	0.000183	2.1	5.95e-09	1.56	0.00378	75	60	44	59.67	124	87	103	93	101.75	98	141	115	97	112.75	80	82	60	111	83.25
Clk1	ENSCGRG00001018410	SIGN	SIGN	SIGN	2.35	0	1.54	8.22e-08	2.8	0	1217	1048	988	1084.33	3294	1915	2753	2298	2565	1235	1708	1628	1661	1558	2449	2844	2067	3973	2833.25
Dnajb1	ENSCGRG00001013728	SIGN	SIGN	SIGN	3.17	0	1.7	0.00053	11.82	0	411	360	350	373.67	1835	689	1382	769	1168.75	452	688	528	545	553.25	3797	4713	2497	6673	4420
Gas8	ENSCGRG00001014955	SIGN	SIGN	SIGN	-1.58	0.00463	-1.77	1.37e-05	-1.72	9.51e-05	128	113	99	113.33	68	79	74	62	70.75	51	58	66	62	59.25	52	45	62	50	52.25
gene:ENSCGRG00001000733	ENSCGRG00001000733	SIGN	SIGN	SIGN	-2.13	0.0084	-5.69	1.33e-12	-2	0.00825	96	43	48	62.33	54	12	27	50	35.75	18	5	3	23	12.25	18	14	46	59	34.25
gene:ENSCGRG00001000784	ENSCGRG00001000784	SIGN	SIGN	SIGN	-309.83	4.55e-09	-42.68	6.65e-06	-29.93	7.82e-07	35	87	39	53.67	35	0	0	0	8.75	129	0	0	40	42.25	23	0	0	0	5.75
gene:ENSCGRG00001001109	ENSCGRG00001001109	SIGN	SIGN	SIGN	9.82	0	5.5	1.05e-13	464.6	0	57	55	30	47.33	846	195	454	210	426.25	155	343	180	148	206.5	17973	18974	15866	22266	18769.8
gene:ENSCGRG00001004990	ENSCGRG00001004990	SIGN	SIGN	SIGN	1.62	8.77e-10	2.77	0	1.83	0	22144	19214	15514	18957.3	38119	24887	28345	30555	30476.5	39109	62486	47322	46000	48729.2	28264	32575	23136	48282	33064.2
gene:ENSCGRG00001010711	ENSCGRG00001010711	SIGN	SIGN	SIGN	1.71	6.28e-07	2.92	0	2.44	0	14903	12637	12629	13389.7	27175	17651	23029	26405	23565	27029	46700	39298	37343	37592.5	27501	28940	22774	44115	30832.5
gene:ENSCGRG00001014239	ENSCGRG00001014239	SIGN	SIGN	SIGN	1.55	7.76e-05	2.1	0	2.44	0	16382	16678	14261	15773.7	29531	18556	26068	21207	23840.5	23339	39438	30611	28353	30435.2	29963	37014	26621	55687	37321.2
gene:ENSCGRG00001018019	ENSCGRG00001018019	SIGN	SIGN	SIGN	1.7	2.68e-06	2.23	0	3.4	0	877	777	703	785.67	1569	1035	1297	1433	1333.5	1362	2265	1473	1479	1644.75	2130	2481	1859	3721	2547.75
gene:ENSCGRG00001018983	ENSCGRG00001018983	SIGN	SIGN	SIGN	1.65	6.05e-10	2.79	0	2.11	0	2479	2134	1805	2139.33	4318	2777	3297	3724	3529	4563	7284	5243	5251	5585.25	3806	4093	2986	6146	4257.75
gene:ENSCGRG00001020860	ENSCGRG00001020860	SIGN	SIGN	SIGN	350.67	0.02	77.91	0.05	460.31	0.00159	0	0	0	0	3	6	0	112	30.25	0	1	152	0	38.25	58	64	22	7	37.75
Glyatl3	ENSCGRG00001016869	SIGN	SIGN	SIGN	4.65	0.0073	7.06	5.88e-06	6.6	5.58e-06	4	2	3	3	22	7	15	9	13.25	20	24	16	14	18.5	19	12	19	33	20.75
Hoxb3	ENSCGRG00001016667	SIGN	SIGN	SIGN	-2.33	0.00507	-2.08	0.00411	-2.48	0.00118	42	47	39	42.67	15	26	15	18	18.5	18	22	16	22	19.5	21	15	5	7	12
Hspb1	ENSCGRG00001015556	SIGN	SIGN	SIGN	2.35	9.02e-12	3.05	0	6.77	0	790	678	658	708.67	1890	1145	1837	1289	1540.25	1256	2594	2624	1280	1938.5	3952	5322	2723	7042	4759.75
Hsph1	ENSCGRG00001021270	SIGN	SIGN	SIGN	2.23	2.18e-08	2.46	1.06e-11	6.33	0	4673	4428	3710	4270.33	12860	5854	10547	7074	9083.75	6760	13509	8940	8164	9343.25	20348	28083	17819	47780	28507.5
Plk2	ENSCGRG00001022259	SIGN	SIGN	SIGN	-1.9	0	-1.53	0	-3.05	0	1519	1371	1163	1351	707	819	597	833	739	797	813	863	946	854.75	404	273	396	323	349
Rbak	ENSCGRG00001014657	SIGN	SIGN	SIGN	1.86	6.28e-07	1.82	3.21e-07	2.59	0	98	97	67	87.33	185	132	170	164	162.75	116	157	177	149	149.75	195	174	175	304	212
Aim2	ENSCGRG00001014376		SIGN	SIGN	1.21	0.03	1.9	0	1.87	0	830	826	758	804.67	1066	862	1027	938	973.25	1159	1684	1444	1453	1435	1274	1234	1129	2000	1409.25
Ankrd42	ENSCGRG00001009333		SIGN	SIGN	-1.32	0.39	-1.52	0.00319	-1.5	0.02	82	80	63	75	61	56	51	76	61	41	46	54	58	49.75	45	34	41	48	42
Aox1	ENSCGRG00001018485		SIGN	SIGN	-1	1	1.74	1.31e-05	2.11	1.02e-12	78	91	52	73.67	58	83	72	73	71.5	100	149	119	103	117.75	120	152	99	310	170.25
Bhlhe40	ENSCGRG00001015526		SIGN	SIGN	-1.13	1	-1.53	0.01	1.87	7.7e-07	87	64	63	71.33	69	60	64	49	60.5	38	51	38	40	41.75	93	114	116	156	119.75
Cacybp	ENSCGRG00001020422		SIGN	SIGN	1.25	0.000555	1.5	0	1.52	0	2861	2696	2223	2593.33	3780	2825	3152	3054	3202.75	2981	4450	3500	3574	3626.25	3194	3399	2921	4896	3602.5
Ccr7	ENSCGRG00001022917		SIGN	SIGN	-1.03	1	-2.67	0	-1.9	8.33e-12	255	209	166	210	226	224	179	157	196.5	72	62	70	78	70.5	99	88	78	113	94.5
Cel	ENSCGRG00001017763		SIGN	SIGN	4.55	1	13.19	0.04	15.64	0.02	0	1	0	0.33	3	0	2	2	1.75	9	3	5	2	4.75	7	6	4	12	7.25
Ctsk	ENSCGRG00001018122		SIGN	SIGN	2.04	0.32	2.41	0.01	5.22	1.58e-11	17	8	7	10.67	29	20	14	23	21.5	13	34	28	20	23.75	44	42	50	67	50.75
Cxcl1	ENSCGRG00001017483		SIGN	SIGN	-1.26	0.56	-1.56	0.000411	-8.46	0	159	131	124	138	94	130	110	103	109.25	85	87	71	89	83	14	16	9	24	15.75
CYTB	ENSCGRG00001000035		SIGN	SIGN	1.22	0.18	1.58	2.11e-09	1.72	0	26483	19358	17667	21169.3	30959	24454	21239	29656	26577	23667	36998	34269	32527	31865.2	29750	30420	26741	35293	30551
Dhx58	ENSCGRG00001010336		SIGN	SIGN	2.01	0.53	2.3	0.04	2.66	0.00483	7	6	8	7	22	11	8	15	14	10	20	17	13	15	14	21	10	34	19.75
Dnaja1	ENSCGRG00001009232		SIGN	SIGN	1.42	0.000154	1.69	1.06e-11	1.74	0	2001	1756	1466	1741	2920	2062	2486	2351	2454.75	2270	3315	2594	2742	2730.25	2454	2671	2176	4040	2835.25
Egr1	ENSCGRG00001016318		SIGN	SIGN	-1.4	1.6e-06	-2.88	0	4.3	0	731	566	596	631	502	444	447	357	437.5	220	179	187	208	198.5	2696	1940	1942	2086	2166
Egr2	ENSCGRG00001022717		SIGN	SIGN	-1.5	0.85	-2.19	0.00793	4.3	0	29	19	19	22.33	18	15	13	8	13.5	10	5	12	7	8.5	96	75	60	84	78.75
Eif4ebp3	ENSCGRG00001014184		SIGN	SIGN	2.45	0.14	2.3	0.04	2.66	0.01	5	7	5	5.67	15	13	12	21	15.25	12	17	10	15	13.5	11	12	14	14	12.75
Ell	ENSCGRG00001009009		SIGN	SIGN	-1.41	0.000293	-1.5	9.13e-07	-2.55	0	284	272	208	254.67	188	215	138	155	174	154	159	159	137	152.25	94	81	65	69	77.25
Fchsd1	ENSCGRG00001023716		SIGN	SIGN	-1.21	0.68	-1.79	7.18e-09	-1.63	1.56e-08	279	265	235	259.67	233	239	204	185	215.25	129	116	135	164	136	144	109	133	149	133.75
Filip1l	ENSCGRG00001003026		SIGN	SIGN	1.19	0.24	2.53	0	2.88	0	312	297	301	303.33	407	321	374	388	372.5	570	792	786	830	744.5	585	925	643	1534	921.75
Fjx1	ENSCGRG00001010732		SIGN	SIGN	-1.19	1	-1.85	0.00222	-2.22	9.19e-05	62	72	48	60.67	49	56	51	41	49.25	27	32	30	30	29.75	23	12	31	25	22.75
Fosl2	ENSCGRG00001014959		SIGN	SIGN	1.27	0.00269	1.64	0	1.97	0	595	591	508	564.67	766	667	705	687	706.25	728	874	1028	795	856.25	895	960	822	1526	1050.75
gene:ENSCGRG00001000284	ENSCGRG00001000284		SIGN	SIGN	1.92	1	3.36	0.01	3.51	0.008	5	2	3	3.33	11	4	6	6	6.75	9	14	7	14	11	7	12	10	12	10.25
gene:ENSCGRG00001000687	ENSCGRG00001000687		SIGN	SIGN	1.28	1	187.36	0.02	182.5	0.01	0	0	0	0	0	0	0	0	0	0	0	77	0	19.25	57	0	0	0	14.25
gene:ENSCGRG00001011332	ENSCGRG00001011332		SIGN	SIGN	1.58	0.12	1.61	0.01	-1.58	0.00764	1939	1884	459	1427.33	2178	1809	2131	1974	2023	1778	2015	1998	2041	1958	1845	875	132	948	950
gene:ENSCGRG00001011428	ENSCGRG00001011428		SIGN	SIGN	-1.17	1	-1.83	6.36e-07	-1.55	0.000106	138	147	124	136.33	123	108	107	130	117	78	76	66	61	70.25	73	67	72	73	71.25
gene:ENSCGRG00001014343	ENSCGRG00001014343		SIGN	SIGN	-1.27	0.1	-1.56	4.05e-07	-1.55	2.04e-06	265	254	141	220	202	182	137	178	174.75	155	129	104	139	131.75	121	117	99	125	115.5
gene:ENSCGRG00001014612	ENSCGRG00001014612		SIGN	SIGN	1.42	0.00632	1.68	6.13e-08	1.54	0.000521	98	105	107	103.33	153	130	173	146	150.5	121	176	182	195	168.5	121	150	112	200	145.75
gene:ENSCGRG00001014722	ENSCGRG00001014722		SIGN	SIGN	2.44	0.51	6.16	4.99e-06	3.15	0.02	6	2	3	3.67	6	10	8	11	8.75	12	35	22	16	21.25	11	13	4	18	11.5
gene:ENSCGRG00001015898	ENSCGRG00001015898		SIGN	SIGN	-1.52	1	-2.53	0.00519	-7.79	2.97e-05	21	28	13	20.67	16	21	7	3	11.75	3	8	8	7	6.5	1	3	2	5	2.75
gene:ENSCGRG00001019431	ENSCGRG00001019431		SIGN	SIGN	1.25	0.23	1.75	1.05e-10	2.02	0	417	330	260	335.67	527	337	388	392	411	429	675	546	497	536.75	540	571	511	676	574.5
gene:ENSCGRG00001019444	ENSCGRG00001019444		SIGN	SIGN	-1.06	1	1.55	0.00122	-2.58	3.41e-09	78	78	66	74	84	53	68	71	69	81	136	111	101	107.25	28	18	23	23	23
Hhipl2	ENSCGRG00001014102		SIGN	SIGN	2.17	0.26	4.19	3.53e-06	3.12	0.000232	8	8	11	9	18	14	24	20	19	21	63	31	29	36	28	17	24	38	26.75
Ier2	ENSCGRG00001015864		SIGN	SIGN	1.01	1	-1.57	0.000257	-2.38	2.47e-10	100	91	101	97.33	104	93	103	94	98.5	51	66	56	59	58	34	32	33	46	36.25
Iqce	ENSCGRG00001008747		SIGN	SIGN	-1.46	0.14	-1.52	0.01	-1.55	0.00463	86	99	96	93.67	66	79	63	41	62.25	57	52	49	65	55.75	52	50	44	40	46.5
Irs3	ENSCGRG00001014601		SIGN	SIGN	1.59	0.96	2.32	0.00442	2.02	0.04	9	15	11	11.67	25	16	19	13	18.25	18	25	30	28	25.25	20	20	17	33	22.5
Kcnj14	ENSCGRG00001011792		SIGN	SIGN	1.33	1	1.65	0.03	2.48	2.43e-09	46	31	29	35.33	58	43	38	30	42.25	44	71	49	30	48.5	76	61	75	95	76.75
Mfsd2a	ENSCGRG00001012559		SIGN	SIGN	-1.45	0.8	-1.67	0.05	-2.28	0.000388	54	50	39	47.67	36	44	22	30	33	21	25	30	31	26.75	19	15	16	26	19
Mkks	ENSCGRG00001024712		SIGN	SIGN	1.23	0.04	1.64	0	1.56	1.29e-11	412	401	381	398	539	433	498	523	498.25	470	725	667	645	626.75	482	529	483	774	567
Mtmr7	ENSCGRG00001021013		SIGN	SIGN	2.1	0.34	3.24	0.000376	2.49	0.00778	8	8	6	7.33	18	11	13	24	16.5	20	26	26	24	24	23	12	9	26	17.5
Oxsm	ENSCGRG00001010895		SIGN	SIGN	-1.3	0.07	-1.5	1.91e-05	-1.66	2.16e-05	209	191	139	179.67	148	158	113	133	138	97	124	109	115	111.25	94	69	98	91	88
Rab20	ENSCGRG00001010575		SIGN	SIGN	-1.56	0.61	-2.18	0.00337	-3.19	9.26e-05	32	26	26	28	20	19	16	24	19.75	9	11	15	18	13.25	6	8	7	5	6.5
Rgma	ENSCGRG00001019932		SIGN	SIGN	-1.13	1	1.5	0.000139	-1.57	0.000774	96	102	89	95.67	88	81	84	87	85	122	129	156	134	135.25	56	41	50	55	50.5
Rgs2	ENSCGRG00001015999		SIGN	SIGN	1.81	0.13	1.79	0.03	2.54	1.23e-08	27	32	17	25.33	60	30	56	50	49	37	46	37	62	45.5	56	57	41	97	62.75
Rrad	ENSCGRG00001019311		SIGN	SIGN	1.24	0.34	1.6	1.66e-07	1.81	1.95e-08	148	120	123	130.33	184	177	124	165	162.5	194	214	172	203	195.75	189	239	148	405	245.25
Sema6b	ENSCGRG00001023299		SIGN	SIGN	-1.13	1	-1.54	0.00224	-1.67	9.16e-05	111	111	80	100.67	90	123	60	92	91.25	60	60	57	72	62.25	58	43	44	56	50.25
Serpinh1	ENSCGRG00001024167		SIGN	SIGN	1.3	0.02	1.88	0	2.03	0	8302	7647	6334	7427.67	11739	8046	9180	8195	9290	10672	15947	12702	11206	12631.8	12080	14426	10141	22508	14788.8
Sh2d3c	ENSCGRG00001011886		SIGN	SIGN	1.11	1	1.68	0.00206	-1.91	0.02	39	50	29	39.33	38	47	40	57	45.5	44	69	80	70	65.75	20	17	12	28	19.25
Slc11a2	ENSCGRG00001010015		SIGN	SIGN	-1.08	1	-1.73	0	-1.8	0	589	541	464	531.33	615	519	403	427	491	284	246	292	310	283	269	211	232	255	241.75
Slc16a6	ENSCGRG00001022280		SIGN	SIGN	-1.51	0.07	-1.69	0.000769	-2.13	4.22e-06	83	85	64	77.33	57	57	38	49	50.25	37	43	50	38	42	39	26	22	16	25.75
Slc5a5	ENSCGRG00001018002		SIGN	SIGN	1.38	1	2.11	0.00559	2.27	0.00177	19	17	12	16	32	16	21	15	21	26	39	26	28	29.75	29	38	20	50	34.25
Sox4	ENSCGRG00001004088		SIGN	SIGN	-1.41	0.01	-1.53	7.85e-05	-2.03	0	256	255	188	233	202	179	142	135	164.5	134	139	123	170	141.5	94	92	89	91	91.5
Star	ENSCGRG00001024286		SIGN	SIGN	1.25	1	1.75	6.65e-05	1.81	2.15e-05	68	59	45	57.33	83	70	68	57	69.5	72	102	102	88	91	74	96	80	134	96
Stc2	ENSCGRG00001023337		SIGN	SIGN	-1.19	0.31	-1.65	9.18e-11	-1.52	3.44e-07	314	294	288	298.67	271	252	244	260	256.75	140	203	155	203	175.25	165	150	160	194	167.25
Swt1	ENSCGRG00001022955		SIGN	SIGN	1.43	0.000415	1.99	0	2.44	0	154	164	134	150.67	259	176	216	213	216	243	283	316	283	281.25	262	372	251	664	387.25
Tenm3	ENSCGRG00001021107		SIGN	SIGN	-1.44	1	-3.66	0.000401	-2.43	0.02	21	19	12	17.33	14	16	8	7	11.25	4	3	4	5	4	6	3	8	5	5.5
Thap2	ENSCGRG00001011633		SIGN	SIGN	1.48	0.55	1.82	0.00331	1.83	9e-05	36	44	31	37	47	38	68	59	53	56	83	63	46	62	57	53	53	65	57
Tnfsf4	ENSCGRG00001013801		SIGN	SIGN	-1.65	0.34	-1.92	0.01	-1.91	0.00942	45	42	43	43.33	28	32	20	34	28.5	26	16	20	30	23	19	15	21	8	15.75
Tspoap1	ENSCGRG00001016758		SIGN	SIGN	-1.13	0.68	-1.5	1.4e-10	-1.98	0	685	654	582	640.33	649	576	517	473	553.75	395	384	385	390	388.5	325	220	237	221	250.75
Bag3	ENSCGRG00001013021	SIGN		SIGN	1.84	4e-08	1.14	0.57	5.8	0	1152	1288	1024	1154.67	3056	1453	2373	1575	2114.25	1096	1215	1234	1236	1195.25	5184	6415	4630	10352	6645.25
Dedd2	ENSCGRG00001011876	SIGN		SIGN	1.83	9.1e-07	1.25	0.21	1.64	6.79e-05	120	85	72	92.33	220	128	168	132	162	98	114	105	90	101.75	118	135	110	206	142.25
Dusp1	ENSCGRG00001019246	SIGN		SIGN	1.53	3.91e-06	-1.14	0.37	4.38	0	684	620	467	590.33	1136	678	1004	772	897.5	389	513	494	506	475.5	1866	2471	1885	3536	2439.5
Dusp8	ENSCGRG00001018480	SIGN		SIGN	1.61	1.1e-07	1.19	0.15	1.95	0	158	168	119	148.33	290	223	215	207	233.75	157	159	171	157	161	199	304	191	447	285.25
Fdxacb1	ENSCGRG00001023825	SIGN		SIGN	-1.52	0.00958	-1.26	0.16	-2.03	4.2e-06	85	96	84	88.33	51	68	60	54	58.25	60	68	66	71	66.25	36	32	37	42	36.75
gene:ENSCGRG00001024608	ENSCGRG00001024608	SIGN		SIGN	-1.73	0.04	-1.3	0.37	-4.37	1.19e-14	85	70	64	73	28	45	39	64	44	52	58	64	44	54.5	16	13	11	20	15
Il11	ENSCGRG00001001006	SIGN		SIGN	2.41	9.05e-09	1.42	0.09	4.07	0	43	47	27	39	116	82	86	60	86	46	67	40	35	47	132	156	90	264	160.5
Jun	ENSCGRG00001011810	SIGN		SIGN	2.09	0	-1.05	1	2.2	0	950	1034	814	932.67	2758	1375	2163	1438	1933.5	766	802	800	830	799.5	1753	1783	1411	2097	1761
Nuak2	ENSCGRG00001024690	SIGN		SIGN	1.6	0.01	-1.06	1	4.31	0	59	66	43	56	117	73	88	71	87.25	48	43	51	49	47.75	191	242	143	313	222.25
Rsrp1	ENSCGRG00001024049	SIGN		SIGN	2.03	0	1.41	5.97e-07	1.62	6.96e-13	348	350	316	338	844	644	629	683	700	365	445	505	508	455.75	471	463	384	529	461.75
Slc35e4	ENSCGRG00001014755	SIGN		SIGN	1.51	4.93e-06	1.06	1	1.64	2.01e-09	191	167	142	166.67	313	209	251	233	251.5	150	155	182	172	164.75	206	233	220	308	241.75
Tiparp	ENSCGRG00001011123	SIGN		SIGN	1.63	3.27e-09	1.21	0.05	2.14	0	1349	1631	1348	1442.67	2680	1993	2647	1976	2324	1321	1785	1660	1726	1623	2277	2765	2424	4061	2881.75
Zfand2a	ENSCGRG00001018973	SIGN		SIGN	3.29	0	-1.06	1	16.36	0	281	255	214	250	1381	439	1043	518	845.25	156	218	222	243	209.75	3109	4159	2700	7168	4284
1700013F07Rik	ENSCGRG00001023187			SIGN	-1.15	1	1.01	1	2.41	0.04	8	2	7	5.67	4	6	6	5	5.25	5	6	4	8	5.75	7	11	16	20	13.5
1700066M21Rik	ENSCGRG00001016585			SIGN	1.06	1	1.16	0.48	-1.57	0.00344	91	104	81	92	106	91	97	80	93.5	98	94	106	85	95.75	36	51	54	45	46.5
1700102P08Rik	ENSCGRG00001024671			SIGN	1.69	1	2.13	0.09	6.26	2.76e-12	9	9	7	8.33	14	6	23	12	13.75	8	27	17	14	16.5	39	48	40	71	49.5
1810013L24Rik	ENSCGRG00001013745			SIGN	1.14	0.59	1.08	0.62	1.55	4.04e-13	632	615	550	599	741	633	693	644	677.75	526	630	645	614	603.75	802	723	710	966	800.25
2300009A05Rik	ENSCGRG00001009275			SIGN	-1.08	1	-1.25	0.32	-1.62	0.00159	69	84	69	74	78	75	53	62	67	53	52	61	51	54.25	32	38	40	41	37.75
2610001J05Rik	ENSCGRG00001006732			SIGN	1.39	1	1.25	0.88	1.93	0.02	25	14	23	20.67	29	19	33	38	29.75	21	31	27	22	25.25	26	36	35	28	31.25
2610008E11Rik	ENSCGRG00001010752			SIGN	-1.01	1	1.15	0.78	-1.56	0.00998	56	63	66	61.67	53	77	50	71	62.75	56	63	86	70	68.75	24	38	34	47	35.75
4930453N24Rik	ENSCGRG00001015042			SIGN	1.12	0.98	1.18	0.05	1.71	0	383	347	303	344.33	418	378	380	394	392.5	337	378	417	423	388.75	465	531	425	755	544
4931406C07Rik	ENSCGRG00001008949			SIGN	-1.19	0.28	-1.17	0.1	-2.01	0	371	418	256	348.33	328	307	239	257	282.75	298	265	265	243	267.75	135	139	141	137	138
4931428F04Rik	ENSCGRG00001022963			SIGN	-1.2	1	-1.16	0.59	-1.74	6.52e-06	122	102	112	112	90	106	81	106	95.75	92	101	82	98	93.25	55	43	58	57	53.25
6430571L13Rik	ENSCGRG00001021545			SIGN	-1.03	1	-1.15	0.6	-1.64	0.00126	103	89	80	90.67	104	93	73	82	88	68	70	78	79	73.75	61	32	40	61	48.5
9930104L06Rik	ENSCGRG00001024913			SIGN	1.1	1	1.16	0.23	-1.81	4.95e-10	225	191	183	199.67	225	204	220	225	218.5	187	252	224	197	215	111	83	72	105	92.75
Aars2	ENSCGRG00001006954			SIGN	-1.08	1	-1.2	0.00681	-1.56	5.61e-13	961	846	802	869.67	908	869	675	744	799	634	661	707	676	669.5	522	396	434	467	454.75
Abcd2	ENSCGRG00001022101			SIGN	-1.25	0.9	-1.11	0.9	-1.51	0.0045	107	121	98	108.67	88	116	58	89	87.75	81	85	108	93	91.75	64	49	60	58	57.75
Abtb1	ENSCGRG00001011986			SIGN	-1.31	0.68	-1.15	0.76	-3.53	1.38e-12	80	90	49	73	55	67	44	56	55.5	51	64	63	58	59	16	20	13	21	17.5
Acrbp	ENSCGRG00001017982			SIGN	1.53	1	1.96	0.5	3.38	0.00774	6	0	5	3.67	4	9	6	2	5.25	9	5	4	7	6.25	12	8	11	10	10.25
Adam1a	ENSCGRG00001014138			SIGN	1.47	1	1.31	0.73	4.95	1.19e-14	15	10	13	12.67	26	13	19	13	17.75	12	18	15	14	14.75	38	53	63	61	53.75
Adamts1	ENSCGRG00001019788			SIGN	-1.48	3.97e-05	1.05	1	-2.18	0	826	837	736	799.67	535	644	420	619	554.5	725	785	879	828	804.25	275	256	358	335	306
Adar	ENSCGRG00001013419			SIGN	-1.02	1	-1.05	0.88	-1.59	5.64e-14	901	882	750	844.33	978	835	736	757	826.5	692	760	739	794	746.25	481	364	440	474	439.75
Ahdc1	ENSCGRG00001012820			SIGN	1.06	1	1.34	0.00547	-2.4	2.38e-13	243	333	261	279	373	271	275	251	292.5	315	346	356	365	345.5	120	70	92	124	101.5
Ajm1	ENSCGRG00001010678			SIGN	1.99	1	2.43	0.39	5.02	0.01	4	0	1	1.67	3	4	3	4	3.5	3	6	3	4	4	5	5	12	10	8
Akap5	ENSCGRG00001010439			SIGN	-1.02	1	1.08	1	52.76	1.14e-07	2	0	0	0.67	1	0	1	0	0.5	0	1	1	0	0.5	34	25	44	21	31
Aldh8a1	ENSCGRG00001023246			SIGN	2.47	1	4.1	0.55	41.51	0.000277	0	1	0	0.33	1	0	2	0	0.75	1	3	1	0	1.25	11	15	21	26	18.25
Ambra1	ENSCGRG00001020313			SIGN	-1.08	1	1.03	1	-1.93	0	554	531	427	504	513	483	422	443	465.25	478	503	449	491	480.25	217	228	184	304	233.25
Amt	ENSCGRG00001000903			SIGN	1.03	1	1.39	0.00611	-3.39	4.6e-14	93	90	72	85	99	85	74	83	85.25	99	123	115	92	107.25	26	18	16	31	22.75
Angel1	ENSCGRG00001002965			SIGN	1.04	1	1.14	0.21	-1.73	2.24e-12	354	357	295	335.33	393	374	281	358	351.5	336	387	347	366	359	188	139	139	195	165.25
Ankle1	ENSCGRG00001008327			SIGN	-1.03	1	-1.04	1	-1.7	2.48e-13	478	439	363	426.67	466	451	344	349	402.5	329	420	389	347	371.25	223	174	207	223	206.75
Ankrd49	ENSCGRG00001014107			SIGN	-1.06	1	1.04	1	-1.84	0	377	376	329	360.67	365	332	305	390	348	308	387	381	378	363.5	172	156	145	160	158.25
Ankrd61	ENSCGRG00001021200			SIGN	-1.01	1	1.08	1	2.83	2e-11	26	27	26	26.33	32	29	18	22	25.25	23	25	31	24	25.75	60	63	57	84	66
Ankzf1	ENSCGRG00001003325			SIGN	-1.12	1	-1.06	0.87	-2.31	0	472	428	381	427	422	386	348	385	385.25	339	390	393	394	379	162	149	134	202	161.75
Apbb3	ENSCGRG00001019043			SIGN	-1.06	1	1.1	0.81	-2.04	1.64e-07	134	128	98	120	124	121	104	81	107.5	101	143	114	112	117.5	51	36	55	60	50.5
Apc2	ENSCGRG00001006203			SIGN	1.5	1	1.25	1	6.47	1.66e-07	5	4	5	4.67	7	5	8	8	7	3	8	7	4	5.5	22	25	28	31	26.5
Apoe	ENSCGRG00001017152			SIGN	1.1	1	-2.06	1	8.84	0.02	1	1	0	0.67	0	1	1	1	0.75	0	0	1	0	0.25	6	3	8	4	5.25
Areg	ENSCGRG00001000398			SIGN	1.38	1	-1.64	0.17	21.64	0	34	18	17	23	36	20	39	28	30.75	16	11	14	9	12.5	342	575	306	1036	564.75
Arhgap33	ENSCGRG00001016824			SIGN	-1.1	1	1.01	1	-1.55	8.29e-05	164	138	129	143.67	143	117	121	136	129.25	132	130	158	117	134.25	81	72	71	79	75.75
Arhgef15	ENSCGRG00001019988			SIGN	1.56	1	-1.4	1	4.6	0.00169	2	4	2	2.67	3	3	5	10	5.25	1	4	2	2	2.25	14	12	4	22	13
Arhgef16	ENSCGRG00001024869			SIGN	1.32	1	1.35	0.61	5.15	0	19	10	11	13.33	29	11	16	14	17.5	17	14	16	19	16.5	39	70	58	124	72.75
Arl4a	ENSCGRG00001004637			SIGN	1.25	1	1.27	0.41	1.82	7.78e-05	41	60	40	47	63	41	77	67	62	42	60	64	72	59.5	75	66	65	100	76.5
Asxl1	ENSCGRG00001002670			SIGN	-1.16	0.11	-1.19	0.00292	-1.79	0	3635	3748	3128	3503.67	3139	3258	2714	2972	3020.75	2697	2665	2822	2822	2751.5	1674	1436	1610	1603	1580.75
Atf3	ENSCGRG00001013063			SIGN	-1.09	1	-1.48	0.17	2.3	3.36e-13	55	65	48	56	59	32	63	44	49.5	29	48	29	31	34.25	94	111	106	216	131.75
Atg10	ENSCGRG00001012356			SIGN	1.26	1	1.07	1	1.65	0.01	21	27	40	29.33	34	42	40	39	38.75	22	33	30	40	31.25	28	48	42	43	40.25
ATP6	ENSCGRG00001000022			SIGN	1.1	1	1.25	0.09	1.7	0	32157	20880	20540	24525.7	32795	23867	22943	31911	27879	21562	34843	30492	30251	29287	35695	31902	31050	41933	35145
ATP8	ENSCGRG00001000021			SIGN	1.08	1	1.31	0.00152	2.13	0	6349	4595	4000	4981.33	6470	4364	4832	6324	5497.5	5265	6853	6475	6018	6152.75	9495	8716	7103	7131	8111.25
Atxn1	ENSCGRG00001022108			SIGN	-1.26	1	-1.57	0.21	-2.03	0.02	26	30	18	24.67	21	19	23	14	19.25	12	13	15	18	14.5	7	11	11	15	11
Atxn7	ENSCGRG00001022842			SIGN	1.16	1	-1.02	1	1.56	3.68e-06	123	141	101	121.67	153	135	136	139	140.75	98	113	122	113	111.5	139	153	165	184	160.25
Atxn7l2	ENSCGRG00001020588			SIGN	-1.04	1	1.03	1	-1.56	3.6e-06	198	217	181	198.67	193	195	186	185	189.75	162	213	200	193	192	92	114	101	114	105.25
Axdnd1	ENSCGRG00001024621			SIGN	1.23	1	1.91	0.08	2.03	0.04	12	10	5	9	15	8	11	10	11	11	22	14	17	16	14	16	14	11	13.75
B4galt5	ENSCGRG00001021312			SIGN	-1.05	1	-1.17	0.03	-1.85	0	971	982	778	910.33	964	882	748	885	869.75	707	763	730	714	728.5	464	343	381	383	392.75
Baat	ENSCGRG00001024533			SIGN	1.28	1	1.87	0.05	2.68	0.000916	12	12	9	11	17	13	13	10	13.25	12	27	18	16	18.25	21	30	20	29	25
Bahcc1	ENSCGRG00001007507			SIGN	-1.05	1	-1.09	0.33	-2.16	0	2439	2452	2002	2297.67	2373	2310	1970	1868	2130.25	1921	1851	2047	1837	1914	970	742	856	899	866.75
Batf2	ENSCGRG00001017734			SIGN	-1.13	1	-1.21	0.74	-1.78	0.02	48	47	55	50	51	42	39	46	44.5	30	41	48	37	39	33	20	15	32	25
Bbc3	ENSCGRG00001017224			SIGN	-1.23	1	1.04	1	-1.8	0.000616	75	72	59	68.67	63	58	57	46	56	66	61	63	78	67	32	21	39	22	28.5
BC030867	ENSCGRG00001012238			SIGN	-1.03	1	-1.01	1	-1.72	1.97e-11	327	317	283	309	347	286	274	279	296.5	251	299	305	270	281.25	159	139	136	173	151.75
Bicd1	ENSCGRG00001012616			SIGN	1.03	1	-1.05	1	1.64	0.02	36	29	24	29.67	33	35	31	18	29.25	27	25	19	29	25	33	49	35	51	42
Bicra	ENSCGRG00001017944			SIGN	-1.21	1	-1.07	1	-1.91	3.24e-05	79	75	60	71.33	59	63	59	50	57.75	60	54	69	63	61.5	28	28	34	42	33
Brat1	ENSCGRG00001016792			SIGN	-1	1	1.06	0.87	-1.58	4.33e-10	457	413	360	410	456	420	343	404	405.75	378	448	404	384	403.5	234	186	204	218	210.5
Brd8	ENSCGRG00001019239			SIGN	-1.16	0.51	1.05	1	-1.98	0	459	445	375	426.33	394	368	343	378	370.75	384	436	439	432	422.75	176	167	177	180	175
Btg2	ENSCGRG00001018732			SIGN	-1.04	1	-1.43	0.31	1.74	0.000312	40	37	41	39.33	38	34	37	38	36.75	27	34	21	18	25	44	52	71	76	60.75
C4b	ENSCGRG00001019658			SIGN	-1.18	1	1.27	0.62	-1.86	0.03	41	37	25	34.33	38	24	27	24	28.25	33	40	48	37	39.5	19	15	10	24	17
Cabyr	ENSCGRG00001010088			SIGN	1.51	1	1.57	0.39	2.24	0.01	9	12	12	11	18	17	12	14	15.25	7	17	29	8	15.25	12	18	31	28	22.25
Calhm2	ENSCGRG00001023936			SIGN	-1.15	1	1.04	1	-1.84	1.5e-06	142	171	119	144	150	136	108	110	126	139	126	137	160	140.5	59	59	70	53	60.25
Capn15	ENSCGRG00001019635			SIGN	1.1	1	1.24	0.01	-1.64	3.35e-09	319	305	227	283.67	378	303	253	281	303.75	261	379	348	286	318.5	157	132	127	197	153.25
Card6	ENSCGRG00001009142			SIGN	-1.13	1	-1.23	0.16	-1.56	0.000471	126	112	81	106.33	110	96	78	93	94.25	81	89	68	82	80	63	49	51	72	58.75
Cc2d1a	ENSCGRG00001014304			SIGN	1.05	1	1.07	0.81	-1.54	9.23e-10	526	506	416	482.67	572	491	450	475	497	421	540	496	426	470.75	292	214	250	331	271.75
Ccdc112	ENSCGRG00001015824			SIGN	1.41	0.19	1.25	0.29	1.52	0.00543	64	55	67	62	91	83	83	79	84	61	79	87	54	70.25	85	71	73	100	82.25
Ccdc114	ENSCGRG00001015977			SIGN	1	1	-1.26	0.01	-2.01	1.19e-14	283	227	212	240.67	293	231	208	213	236.25	163	187	178	165	173.25	107	93	89	140	107.25
Ccdc24	ENSCGRG00001016428			SIGN	-1.1	1	1.15	0.73	-1.57	0.00636	68	76	54	66	70	50	58	63	60.25	50	90	77	70	71.75	39	30	32	47	37
Ccdc71	ENSCGRG00001005293			SIGN	-1.23	0.14	-1.08	0.72	-1.68	4.22e-10	327	302	223	284	250	240	202	237	232.25	238	255	237	253	245.75	155	128	122	145	137.5
Ccdc8	ENSCGRG00001014782			SIGN	-1.01	1	1.01	1	-2.43	5.69e-11	111	151	119	127	139	119	132	117	126.75	108	111	133	135	121.75	48	35	43	40	41.5
Ccdc9	ENSCGRG00001007536			SIGN	1.02	1	1.12	0.47	-1.65	5.1e-07	207	193	142	180.67	207	194	152	146	174.75	193	199	175	146	178.25	106	79	78	130	98.25
Ccdc96	ENSCGRG00001013284			SIGN	1.18	1	-1.11	1	2.7	0.000894	12	12	8	10.67	12	10	16	10	12	8	12	7	7	8.5	21	24	25	30	25
Ccn5	ENSCGRG00001019644			SIGN	-1.07	1	1.2	1	6.99	1.83e-10	11	3	5	6.33	8	8	3	5	6	5	2	13	9	7.25	32	44	32	73	45.25
Ccne2	ENSCGRG00001022482			SIGN	1.09	1	1.2	0.01	-1.57	4.2e-11	583	554	456	531	591	557	598	610	589	505	658	635	641	609.75	281	267	265	321	283.5
Ccnf	ENSCGRG00001021164			SIGN	-1.02	1	1.13	0.13	-2.39	0	1230	1175	1003	1136	1290	1065	1011	1067	1108.25	1064	1366	1157	1154	1185.25	458	367	324	431	395
Ccnj	ENSCGRG00001014847			SIGN	-1.18	0.7	-1	1	-1.54	8.4e-06	210	185	186	193.67	168	167	153	180	167	166	196	187	186	183.75	117	90	97	84	97
Ccnl2	ENSCGRG00001017635			SIGN	1.09	1	1.15	0.04	-1.71	0	1416	1273	1149	1279.33	1669	1320	1252	1343	1396	1117	1531	1482	1386	1379	643	648	517	960	692
Ccr10	ENSCGRG00001000112			SIGN	-1.25	1	-1.14	0.84	-1.68	0.00491	64	74	47	61.67	54	54	45	46	49.75	58	44	43	57	50.5	30	27	31	36	31
Ccrl2	ENSCGRG00001011599			SIGN	-1.19	1	-1.45	0.0047	-1.65	0.000137	144	142	116	134	105	127	103	137	118	99	70	93	103	91.25	73	50	73	74	67.5
Cdan1	ENSCGRG00001022325			SIGN	1.34	0.00109	1.47	1.28e-07	-1.65	6.31e-09	263	286	223	257.33	436	306	320	303	341.25	287	380	379	354	350	150	120	105	179	138.5
Cdc42ep2	ENSCGRG00001005189			SIGN	-1.78	0.24	1.01	1	-2.63	0.00196	18	33	25	25.33	12	19	12	19	15.5	19	24	29	35	26.75	10	7	6	11	8.5
Cdr2	ENSCGRG00001017854			SIGN	1.39	2.68e-06	1.1	0.41	1.72	0	505	486	448	479.67	821	565	669	610	666.25	439	504	505	526	493.5	718	744	536	1009	751.75
Cebpb	ENSCGRG00001001737			SIGN	1.66	0.15	1.59	0.05	2.79	0	76	62	62	66.67	94	103	106	144	111.75	65	87	209	72	108.25	151	191	110	141	148.25
Cemip2	ENSCGRG00001012864			SIGN	-1.03	1	-1.16	0.07	-1.7	0	712	633	503	616	696	617	512	556	595.25	473	487	491	532	495.75	313	248	313	286	290
Cgas	ENSCGRG00001023109			SIGN	1.22	0.15	1.19	0.07	3.29	0	283	259	257	266.33	394	276	326	292	322	246	311	319	301	294.25	705	764	644	1141	813.5
Chac1	ENSCGRG00001014710			SIGN	1.05	1	-1.01	1	3.23	0	127	123	115	121.67	153	125	121	91	122.5	118	114	89	108	107.25	265	422	275	738	425
Chadl	ENSCGRG00001017198			SIGN	-1.27	1	-1.16	1	3.37	0.02	8	1	1	3.33	1	6	1	1	2.25	3	3	1	2	2.25	9	7	12	16	11
Chst12	ENSCGRG00001000937			SIGN	-1.06	1	-1.02	1	-1.89	1.19e-14	313	319	262	298	266	306	278	276	281.5	262	241	314	277	273.5	160	109	111	121	125.25
Cic	ENSCGRG00001017203			SIGN	1.11	0.87	1.24	0.00064	-1.5	3.41e-11	923	928	820	890.33	1143	956	894	831	956	963	1021	1104	910	999.5	533	408	494	592	506.75
Clasrp	ENSCGRG00001015861			SIGN	-1.01	1	1.07	0.89	-1.51	1.09e-06	291	299	229	273	339	262	206	259	266.5	232	301	293	241	266.75	161	146	126	166	149.75
Clcn7	ENSCGRG00001022791			SIGN	-1.11	1	-1.03	1	-1.51	1.05e-07	414	379	306	366.33	369	339	301	277	321.5	295	356	325	320	324	203	195	187	251	209
Cldn6	ENSCGRG00001007126			SIGN	-1.12	1	1.02	1	2.3	0.03	5	5	10	6.67	7	7	1	10	6.25	6	8	8	5	6.75	17	7	14	18	14
Clec3b	ENSCGRG00001022700			SIGN	1.75	1	3.91	0.31	7.36	0.04	1	0	1	0.67	1	2	1	1	1.25	3	3	2	3	2.75	5	4	5	3	4.25
Clk2	ENSCGRG00001014237			SIGN	-1.02	1	1.27	0.00137	-1.61	1.87e-10	441	379	333	384.33	461	373	303	351	372	367	516	481	433	449.25	212	185	176	276	212.25
Cln8	ENSCGRG00001005528			SIGN	-1.06	1	-1.13	0.58	-1.88	5.34e-13	265	270	211	248.67	284	216	208	225	233.25	178	185	255	202	205	117	92	109	114	108
Cnksr2	ENSCGRG00001022169			SIGN	1.08	1	1.31	0.11	1.69	0.000208	89	55	83	75.67	102	74	81	66	80.75	86	80	100	100	91.5	99	108	101	148	114
Cnot4	ENSCGRG00001014651			SIGN	1.35	0.000112	1.31	0.000169	1.55	3.75e-11	402	379	325	368.67	577	457	476	525	508.75	369	496	486	500	462.75	506	433	441	547	481.75
Cntf	ENSCGRG00001018887			SIGN	1.39	1	1.63	0.57	4.14	8.79e-05	4	5	5	4.67	7	6	5	9	6.75	6	11	6	7	7.5	15	14	19	23	17.75
Cntnap1	ENSCGRG00001023354			SIGN	1.01	1	1.08	0.54	-1.61	4.6e-14	824	744	677	748.33	852	724	661	757	748.5	674	763	869	707	753.25	403	333	388	440	391
Coil	ENSCGRG00001012212			SIGN	1	1	1.11	0.35	-2.17	0	452	429	397	426	446	436	392	435	427.25	369	504	474	432	444.75	188	133	153	204	169.5
COX1	ENSCGRG00001000016			SIGN	1.12	1	1.17	0.43	1.53	3.11e-08	139884	90970	76093	102316	142883	104049	85178	129091	115300	85083	131432	120906	107487	111227	127431	113994	125368	152020	129703
COX3	ENSCGRG00001000023			SIGN	1.08	1	1.14	0.28	1.57	0	46811	36072	32189	38357.3	49760	38402	36203	45167	42383	33998	44049	44102	44400	41637.2	50168	47158	46623	55519	49867
Cpeb2	ENSCGRG00001011001			SIGN	1.37	0.000254	1.35	8.01e-05	1.88	0	259	303	265	275.67	413	367	377	308	366.25	285	359	386	333	340.75	392	409	449	452	425.5
Cpeb4	ENSCGRG00001021805			SIGN	1.23	0.31	1.07	1	2.14	0	162	134	133	143	212	154	185	130	170.25	125	140	146	137	137	226	267	244	315	263
Cpt1c	ENSCGRG00001015931			SIGN	1.12	1	1.4	0.03	-3.19	6.73e-14	107	85	75	89	112	112	71	86	95.25	81	160	119	91	112.75	23	18	26	34	25.25
Crebbp	ENSCGRG00001016476			SIGN	1.05	1	1.06	0.94	1.69	5.64e-14	304	301	237	280.67	351	294	262	233	285	257	260	293	269	269.75	398	386	354	552	422.5
Cry2	ENSCGRG00001020400			SIGN	-1.25	0.06	-1.28	0.00287	-1.73	3.24e-12	386	332	276	331.33	290	298	219	246	263.25	237	246	230	245	239.5	167	132	162	179	160
Csf3	ENSCGRG00001020760			SIGN	-1.23	1	-1.96	0.08	-3.44	0.00638	20	11	13	14.67	15	12	11	12	12.5	6	3	10	10	7.25	4	5	1	5	3.75
Csrnp1	ENSCGRG00001003977			SIGN	1.13	1	-1.24	0.03	4.41	0	306	230	203	246.33	317	271	246	257	272.75	168	188	203	170	182.25	846	967	791	1152	939
CTU1	ENSCGRG00001014129			SIGN	-1.03	1	-1.06	0.92	-1.51	2.83e-08	446	449	359	418	457	429	335	389	402.5	341	398	364	361	366	218	226	224	283	237.75
Cyb561d1	ENSCGRG00001010927			SIGN	-1.08	1	-1.08	0.85	-1.98	5.64e-14	258	234	198	230	235	227	203	190	213.75	180	191	203	229	200.75	95	84	101	102	95.5
D10Wsu102e	ENSCGRG00001023760			SIGN	-1.23	0.06	-1.47	5.79e-08	-1.76	1.19e-14	432	408	392	410.67	360	366	292	318	334	258	239	274	276	261.75	213	169	182	182	186.5
Ddah2	ENSCGRG00001013784			SIGN	-1.48	1	-1.98	0.27	-5.82	0.02	11	7	6	8	5	6	4	7	5.5	6	5	1	3	3.75	1	2	0	5	2
Ddx28	ENSCGRG00001024412			SIGN	-1.16	0.87	-1.14	0.37	-3.94	0	247	199	188	211.33	194	175	175	201	186.25	173	170	184	182	177.25	47	49	33	72	50.25
Dgkq	ENSCGRG00001024827			SIGN	1	1	1	1	-1.62	1.4e-06	223	166	145	178	201	194	149	153	174.25	173	169	145	160	161.75	100	93	70	96	89.75
Dhrs13	ENSCGRG00001004280			SIGN	-1.36	0.91	-1.47	0.11	-1.9	0.000215	60	65	49	58	42	49	41	36	42	38	32	37	38	36.25	27	24	22	29	25.5
Dipk1a	ENSCGRG00001004793			SIGN	-1.02	1	-1.08	1	-1.83	0.000105	84	94	78	85.33	104	82	69	86	85.25	70	56	92	84	75.5	50	31	31	47	39.75
Dlx2	ENSCGRG00001000503			SIGN	1.18	0.24	-1.13	0.27	2.29	0	413	419	335	389	512	428	445	388	443.25	296	362	310	274	310.5	608	794	753	936	772.75
Dnajb4	ENSCGRG00001022849			SIGN	1.12	1	1.02	1	1.68	1.27e-11	228	202	174	201.33	292	189	216	227	231	171	209	174	234	197	285	312	217	438	313
Dnajb7	ENSCGRG00001010409			SIGN	-1.54	1	-1.15	1	7.87	0.000407	2	0	3	1.67	2	1	0	1	1	2	2	0	1	1.25	9	20	4	27	15
Dnajc27	ENSCGRG00001023794			SIGN	-1.06	1	1.23	0.02	-1.63	1.56e-08	267	266	238	257	270	272	193	243	244.5	254	319	310	306	297.25	131	122	128	123	126
Dolk	ENSCGRG00001009570			SIGN	-1.13	1	-1.32	0.00257	-1.6	3.2e-07	236	207	216	219.67	221	183	191	176	192.75	147	152	161	154	153.5	123	96	114	124	114.25
Dusp10	ENSCGRG00001018543			SIGN	1.2	0.25	1.37	2.94e-05	-1.54	3.96e-05	294	301	281	292	403	334	321	299	339.25	346	380	387	336	362.25	183	179	104	327	198.25
Dusp16	ENSCGRG00001017988			SIGN	1.17	0.1	1.29	1.38e-05	1.73	0	1297	1271	1049	1205.67	1681	1250	1393	1320	1411	1218	1619	1462	1509	1452	1739	1814	1481	2772	1951.5
Dyrk3	ENSCGRG00001021644			SIGN	1.14	0.98	1.05	1	1.63	2.13e-10	230	211	176	205.67	257	233	229	213	233	174	194	225	206	199.75	242	290	277	393	300.5
E130308A19Rik	ENSCGRG00001004916			SIGN	1.07	1	-1.03	1	1.69	0.000456	57	46	56	53	67	46	55	56	56	49	47	52	43	47.75	70	78	69	96	78.25
E4f1	ENSCGRG00001013197			SIGN	-1.07	1	1.08	0.68	-1.52	8.37e-08	393	340	319	350.67	391	330	274	306	325.25	322	396	336	350	351	218	183	156	259	204
Ebi3	ENSCGRG00001005497			SIGN	1.19	1	-1.74	1	5.57	0.04	1	2	0	1	2	1	1	1	1.25	0	1	0	1	0.5	4	4	7	0	3.75
Efna1	ENSCGRG00001024279			SIGN	-1.19	0.93	-1.03	1	-2.46	1.48e-10	116	124	108	116	98	99	96	110	100.75	101	103	112	120	109	41	29	44	46	40
Efna4	ENSCGRG00001017321			SIGN	1.06	1	-1.08	1	-2.32	5.59e-07	82	65	48	65	74	92	46	62	68.5	43	54	66	61	56	30	17	20	24	22.75
Egln2	ENSCGRG00001012545			SIGN	-1.07	1	-1.04	1	-1.78	2.66e-13	384	343	280	335.67	367	330	263	283	310.75	275	328	287	300	297.5	176	134	145	188	160.75
Elavl3	ENSCGRG00001018927			SIGN	2.24	1	2.06	0.61	6.54	0.00115	2	2	1	1.67	3	3	4	5	3.75	3	3	6	1	3.25	11	8	9	14	10.5
Elmo3	ENSCGRG00001001125			SIGN	-1.23	1	-1.04	1	-3.27	3.79e-06	55	47	34	45.33	35	41	30	39	36.25	27	53	47	35	40.5	13	9	11	16	12.25
Engase	ENSCGRG00001020002			SIGN	-1.22	0.09	-1.39	2.52e-06	-1.67	6.05e-13	531	461	400	464	447	380	328	346	375.25	300	336	289	296	305.25	249	200	222	269	235
Eno2	ENSCGRG00001005536			SIGN	1.1	1	1.2	0.42	-2.06	1.79e-05	67	64	56	62.33	75	66	65	61	66.75	63	77	70	62	68	28	20	25	29	25.5
Ephb3	ENSCGRG00001013531			SIGN	1.07	1	1.26	0.3	-3.32	2.74e-07	64	56	51	57	72	59	47	67	61.25	58	86	61	65	67.5	13	19	9	15	14
Epor	ENSCGRG00001009147			SIGN	1.32	1	3.07	0.54	8.01	0.02	1	1	0	0.67	2	1	0	0	0.75	1	3	2	1	1.75	4	6	5	6	5.25
Ercc2	ENSCGRG00001013953			SIGN	1.01	1	1.02	1	-1.59	4.2e-11	519	515	407	480.33	557	498	408	435	474.5	459	450	459	425	448.25	279	217	231	286	253.25
Espl1	ENSCGRG00001019762			SIGN	1.01	1	1.16	0.02	-1.53	0	3079	3022	2441	2847.33	3154	2922	2559	2768	2850.75	2892	3235	3118	3016	3065.25	1601	1440	1444	1852	1584.25
Evpl	ENSCGRG00001023621			SIGN	1.23	1	1.33	0.81	2.29	0.00683	13	15	9	12.33	16	22	15	9	15.5	5	19	15	25	16	24	17	28	29	24.5
Exo5	ENSCGRG00001006191			SIGN	-1.33	0.41	-1.05	1	-1.68	0.000155	86	91	95	90.67	83	64	54	82	70.75	78	85	84	90	84.25	42	40	49	62	48.25
Exoc8	ENSCGRG00001015839			SIGN	-1.22	0.23	-1.11	0.51	-1.59	1.04e-07	273	272	218	254.33	212	241	180	177	202.5	204	225	205	196	207.5	138	142	105	138	130.75
Ezh1	ENSCGRG00001004522			SIGN	-1.06	1	-1.07	0.88	-1.81	2.34e-14	355	358	304	339	342	311	308	315	319	267	295	331	303	299	161	133	157	166	154.25
Fadd	ENSCGRG00001007270			SIGN	-1.17	1	-1.11	0.84	-1.52	0.00229	128	155	104	129	119	128	92	97	109	115	101	100	111	106.75	84	57	63	78	70.5
Fam102a	ENSCGRG00001015033			SIGN	1.01	1	-1.07	0.69	-1.86	0	578	652	543	591	651	577	561	554	585.75	502	485	568	471	506.5	271	278	216	364	282.25
Fam222b	ENSCGRG00001015417			SIGN	1.18	0.29	1.1	0.5	-2.58	0	319	361	298	326	454	363	360	296	368.25	309	362	322	284	319.25	123	99	82	143	111.75
Fam234b	ENSCGRG00001011675			SIGN	1.01	1	1.07	1	-1.64	0.000671	129	146	139	138	167	123	121	122	133.25	116	134	176	108	133.5	91	53	61	76	70.25
Fam78a	ENSCGRG00001004596			SIGN	1.06	1	1.32	0.07	-2.41	7.69e-09	110	100	76	95.33	133	97	79	103	103	90	133	122	132	119.25	46	21	28	46	35.25
Fam83d	ENSCGRG00001004084			SIGN	-1.1	0.94	-1.06	0.77	-2.27	0	1163	1112	910	1061.67	1014	986	858	976	958.5	810	990	1039	905	936	445	300	388	300	358.25
Fam83h	ENSCGRG00001013512			SIGN	-1.46	1	1.32	0.62	-2.38	0.00519	22	30	25	25.67	17	21	18	9	16.25	24	28	41	25	29.5	11	4	11	6	8
Fbxl5	ENSCGRG00001012142			SIGN	-1	1	1.19	0.05	-1.77	1.1e-13	389	362	309	353.33	396	340	308	375	354.75	375	412	403	385	393.75	179	142	159	208	172
Fbxw10	ENSCGRG00001012375			SIGN	1.11	1	1.04	1	2.2	6.65e-12	97	71	77	81.67	121	77	81	77	89	64	85	83	80	78	137	181	118	261	174.25
Fcgbp	ENSCGRG00001011221			SIGN	-1.13	1	-1.11	1	-1.77	0.03	47	34	50	43.67	44	38	34	30	36.5	32	40	40	27	34.75	19	21	20	31	22.75
Fcho1	ENSCGRG00001016391			SIGN	1.07	1	-1.03	1	-1.62	0.000428	105	94	73	90.67	130	93	68	87	94.5	73	81	91	73	79.5	47	43	44	65	49.75
Fem1c	ENSCGRG00001024497			SIGN	1.2	0.14	1.09	0.55	2.23	0	448	451	369	422.67	549	504	519	463	508.75	383	459	403	494	434.75	748	822	703	1116	847.25
Fgd3	ENSCGRG00001016233			SIGN	-1	1	1.07	1	-1.96	0.00271	62	62	34	52.67	53	47	60	40	50	44	56	56	45	50.25	29	19	16	29	23.25
Fhod1	ENSCGRG00001019021			SIGN	-1.09	1	-1.18	0.04	-1.6	4.83e-12	593	537	478	536	570	519	408	448	486.25	396	391	469	429	421.25	312	228	268	262	267.5
Fignl2	ENSCGRG00001014354			SIGN	-1.08	1	-1.93	0.07	-2.55	0.02	21	16	14	17	16	20	11	20	16.75	6	5	14	10	8.75	4	3	9	7	5.75
Flnc	ENSCGRG00001005204			SIGN	-1.17	1	-1.45	0.01	-1.61	0.00473	88	83	55	75.33	79	64	55	44	60.5	49	49	42	40	45	45	30	37	57	42.25
Fndc3a	ENSCGRG00001020347			SIGN	1.09	1	1.19	0.01	1.8	0	737	816	630	727.67	917	745	727	735	781	723	841	860	791	803.75	1022	1164	961	1664	1202.75
Fos	ENSCGRG00001006758			SIGN	2.37	0.2	1	1	30.14	0	8	11	5	8	18	13	23	18	18	5	15	5	4	7.25	205	218	162	265	212.5
Foxf1	ENSCGRG00001012787			SIGN	1.08	1	1.19	0.05	1.56	1.82e-10	337	332	261	310	375	357	294	295	330.25	279	373	364	341	339.25	383	433	345	634	448.75
Foxred2	ENSCGRG00001018108			SIGN	-1.43	1	1.01	1	5.34	0.00594	3	1	1	1.67	1	1	1	2	1.25	1	3	1	2	1.75	8	6	9	12	8.75
Frs2	ENSCGRG00001012645			SIGN	1.13	0.98	1.19	0.05	1.53	2.69e-09	303	322	263	296	360	328	325	312	331.25	292	335	357	333	329.25	366	353	370	450	384.75
Frs3	ENSCGRG00001017194			SIGN	1.07	1	-1.12	1	-2.95	0.000487	38	27	31	32	39	41	25	28	33.25	22	31	25	25	25.75	7	10	9	4	7.5
Fut11	ENSCGRG00001018775			SIGN	1.19	0.61	1.12	0.5	-1.59	7.1e-06	185	179	139	167.67	235	197	165	191	197	148	201	178	170	174.25	81	87	86	121	93.75
Fzd4	ENSCGRG00001017396			SIGN	-1.09	1	-1.16	0.26	-1.62	1.3e-06	214	162	160	178.67	174	168	147	172	165.25	129	166	140	143	144.5	104	73	89	109	93.75
Fzd7	ENSCGRG00001010812			SIGN	-1.15	0.46	-1.33	1.4e-05	-2.23	0	665	762	536	654.33	588	622	521	462	548.25	478	427	439	415	439.75	260	204	240	243	236.75
Gabbr1	ENSCGRG00001020413			SIGN	-1.06	1	-1.01	1	-2.4	0	262	218	242	240.67	238	216	218	242	228.5	202	218	263	220	225.75	99	63	81	110	88.25
Gadd45b	ENSCGRG00001024479			SIGN	-1.02	1	-1.28	0.05	-2.1	0	261	199	172	210.67	191	218	182	246	209.25	184	150	141	149	156	88	74	79	102	85.75
Gal3st4	ENSCGRG00001023710			SIGN	1.24	1	1.32	0.75	2.72	5.21e-05	17	17	11	15	23	15	16	17	17.75	14	27	16	13	17.5	36	29	34	44	35.75
Gbgt1	ENSCGRG00001024653			SIGN	-1.25	1	1.08	1	-2.4	3.51e-06	65	65	48	59.33	56	50	36	42	46	53	56	71	52	58	29	16	14	17	19
Gcnt7	ENSCGRG00001024252			SIGN	-1.15	1	-1.11	1	7.25	0.00201	1	1	2	1.33	0	2	2	0	1	1	0	2	1	1	10	10	5	14	9.75
Gdpgp1	ENSCGRG00001012639			SIGN	-1.23	0.68	-1.23	0.18	-1.9	8.17e-07	105	114	86	101.67	79	87	86	83	83.75	69	80	79	88	79	47	36	46	42	42.75
gene:ENSCGRG00001000181	ENSCGRG00001000181			SIGN	1.01	1	-1.07	1	1.52	0.01	49	46	36	43.67	48	46	36	50	45	37	46	33	41	39.25	54	57	48	51	52.5
gene:ENSCGRG00001000391	ENSCGRG00001000391			SIGN	1.02	1	1.04	0.97	1.51	0	2073	1725	1901	1899.67	2110	1651	2071	2111	1985.75	1668	1905	2024	1994	1897.75	2567	2160	2212	2237	2294
gene:ENSCGRG00001000605	ENSCGRG00001000605			SIGN	1.31	1	1.8	0.11	2.39	0.01	12	14	3	9.67	12	12	12	17	13.25	20	18	12	18	17	17	16	23	21	19.25
gene:ENSCGRG00001000897	ENSCGRG00001000897			SIGN	1.04	1	1.19	1	1.82	0.04	11	17	12	13.33	11	10	15	23	14.75	17	16	18	13	16	19	17	23	17	19
gene:ENSCGRG00001001048	ENSCGRG00001001048			SIGN	1.02	1	1.07	0.74	-1.54	7.88e-12	865	788	677	776.67	965	771	669	713	779.5	716	812	757	760	761.25	472	404	342	549	441.75
gene:ENSCGRG00001001302	ENSCGRG00001001302			SIGN	-1.02	1	-1.02	1	-1.57	1.69e-10	503	455	440	466	519	460	417	435	457.75	366	448	453	446	428.25	235	238	242	414	282.25
gene:ENSCGRG00001001436	ENSCGRG00001001436			SIGN	1.18	1	1.13	0.89	1.61	0.000208	58	57	67	60.67	88	59	72	65	71	49	69	72	66	64	84	67	87	134	93
gene:ENSCGRG00001001590	ENSCGRG00001001590			SIGN	-1.02	1	1.1	1	6.33	1.12e-05	2	5	2	3	4	1	3	5	3.25	1	7	2	4	3.5	14	19	14	26	18.25
gene:ENSCGRG00001002480	ENSCGRG00001002480			SIGN	-1.04	1	-1.17	1	1.63	0.01	38	33	26	32.33	31	31	29	46	34.25	31	22	26	35	28.5	37	51	39	65	48
gene:ENSCGRG00001002491	ENSCGRG00001002491			SIGN	1.13	1	1.12	0.87	1.56	0.000615	71	60	56	62.33	66	76	71	82	73.75	57	71	68	78	68.5	85	73	77	103	84.5
gene:ENSCGRG00001003022	ENSCGRG00001003022			SIGN	1.01	1	1	1	-1.59	4.43e-11	502	477	470	483	524	512	468	486	497.5	375	472	487	532	466.5	230	260	245	313	262
gene:ENSCGRG00001003128	ENSCGRG00001003128			SIGN	1.09	1	1.07	0.91	-1.58	2.5e-06	239	199	150	196	275	213	166	178	208	175	225	168	193	190.25	127	94	77	87	96.25
gene:ENSCGRG00001003986	ENSCGRG00001003986			SIGN	1.3	1	1.78	0.09	2.42	0.00176	10	17	12	13	16	18	18	15	16.75	23	21	20	22	21.5	23	28	25	30	26.5
gene:ENSCGRG00001004340	ENSCGRG00001004340			SIGN	-1.34	1	-1.36	0.56	-2.25	0.00718	28	22	23	24.33	26	19	9	15	17.25	15	16	19	13	15.75	9	8	9	4	7.5
gene:ENSCGRG00001004717	ENSCGRG00001004717			SIGN	1.22	0.9	1.18	0.45	1.53	6.94e-05	189	133	199	173.67	204	176	217	264	215.25	193	204	207	169	193.25	222	208	209	301	235
gene:ENSCGRG00001004945	ENSCGRG00001004945			SIGN	1.35	1	-1.11	1	1.94	0.00127	66	38	25	43	68	59	45	69	60.25	17	39	51	44	37.75	51	74	69	103	74.25
gene:ENSCGRG00001005230	ENSCGRG00001005230			SIGN	-1.57	0.93	-1.66	0.21	-2.73	0.01	20	20	9	16.33	13	9	8	10	10	9	9	10	7	8.75	3	6	5	5	4.75
gene:ENSCGRG00001005474	ENSCGRG00001005474			SIGN	1.1	1	-1.04	1	1.59	0.00389	55	60	34	49.67	56	50	59	78	60.75	58	35	40	66	49.75	73	57	60	66	64
gene:ENSCGRG00001005543	ENSCGRG00001005543			SIGN	1.18	1	1.39	0.01	1.58	4.95e-06	118	91	109	106	119	98	144	191	138	112	161	161	176	152.5	150	115	142	175	145.5
gene:ENSCGRG00001006102	ENSCGRG00001006102			SIGN	1.23	0.29	1.48	7.89e-06	1.6	1.19e-14	650	549	464	554.33	620	755	639	960	743.5	567	763	1062	990	845.5	709	691	731	863	748.5
gene:ENSCGRG00001006325	ENSCGRG00001006325			SIGN	-1.03	1	1.01	1	-2.02	3.81e-06	74	85	68	75.67	77	75	63	76	72.75	65	93	63	63	71	33	34	23	46	34
gene:ENSCGRG00001007108	ENSCGRG00001007108			SIGN	-1.52	1	-1.11	1	-3.38	0.00635	16	14	13	14.33	7	10	13	9	9.75	9	13	13	16	12.75	5	2	3	10	5
gene:ENSCGRG00001007764	ENSCGRG00001007764			SIGN	1.73	1	-1.58	0.92	2.83	0.03	2	4	5	3.67	5	8	7	1	5.25	1	3	2	1	1.75	4	10	12	7	8.25
gene:ENSCGRG00001008082	ENSCGRG00001008082			SIGN	7.1	1	13.97	0.49	93.26	0.04	0	0	0	0	1	0	1	2	1	1	2	2	3	2	9	9	12	19	12.25
gene:ENSCGRG00001008371	ENSCGRG00001008371			SIGN	1.76	1	1.14	1	5.25	0.00122	3	0	4	2.33	11	2	0	3	4	3	1	3	2	2.25	11	11	9	18	12.25
gene:ENSCGRG00001008812	ENSCGRG00001008812			SIGN	1.59	1	2.63	0.06	3.5	0.01	8	3	0	3.67	7	5	6	6	6	7	9	11	10	9.25	7	16	8	16	11.75
gene:ENSCGRG00001009361	ENSCGRG00001009361			SIGN	3.4	1	2.09	0.97	11.25	0.00484	0	2	0	0.67	4	1	2	2	2.25	0	3	2	0	1.25	5	10	6	18	9.75
gene:ENSCGRG00001009781	ENSCGRG00001009781			SIGN	-1.25	0.59	-1.34	0.02	-1.52	6.52e-05	172	173	146	163.67	176	143	98	96	128.25	92	116	114	119	110.25	93	93	73	104	90.75
gene:ENSCGRG00001009932	ENSCGRG00001009932			SIGN	-1.13	1	-1.64	1	3.4	0.04	2	1	4	2.33	1	3	1	3	2	3	2	0	0	1.25	6	8	6	7	6.75
gene:ENSCGRG00001010370	ENSCGRG00001010370			SIGN	-1.15	1	-1.04	1	-2.07	0.02	25	23	19	22.33	25	22	15	17	19.75	19	19	18	25	20.25	10	4	12	14	10
gene:ENSCGRG00001010382	ENSCGRG00001010382			SIGN	1.23	0.32	1.25	0.04	1.61	5.89e-08	172	133	134	146.33	196	151	189	201	184.25	167	173	181	182	175.75	226	182	159	213	195
gene:ENSCGRG00001010889	ENSCGRG00001010889			SIGN	-1.2	0.06	-1.25	0.00054	-1.53	3.68e-12	986	937	806	909.67	836	785	708	708	759.25	627	704	664	725	680	478	442	518	555	498.25
gene:ENSCGRG00001011191	ENSCGRG00001011191			SIGN	-1.08	1	-1.2	0.51	-1.54	0.01	83	91	51	75	99	62	58	46	66.25	59	48	57	55	54.75	47	31	38	49	41.25
gene:ENSCGRG00001011231	ENSCGRG00001011231			SIGN	-1	1	-1.27	0.91	-5.86	0.0021	12	12	14	12.67	11	17	9	9	11.5	7	11	11	5	8.5	1	1	3	3	2
gene:ENSCGRG00001011413	ENSCGRG00001011413			SIGN	1.11	1	1.29	0.26	1.61	0.00332	49	44	52	48.33	64	44	47	59	53.5	56	71	54	52	58.25	71	62	55	64	63
gene:ENSCGRG00001011559	ENSCGRG00001011559			SIGN	-1.09	1	1.1	0.56	-1.63	2.34e-08	278	257	200	245	227	234	216	226	225.75	236	287	225	274	255.5	119	112	130	147	127
gene:ENSCGRG00001011827	ENSCGRG00001011827			SIGN	1.45	0.00474	1.29	0.05	1.78	7.15e-09	109	94	79	94	154	127	130	145	139	111	120	106	124	115.25	150	134	119	144	136.75
gene:ENSCGRG00001011895	ENSCGRG00001011895			SIGN	-1.04	1	-1.1	0.71	-1.88	2.37e-10	202	169	168	179.67	192	188	144	127	162.75	148	151	153	122	143.5	79	83	68	66	74
gene:ENSCGRG00001012006	ENSCGRG00001012006			SIGN	-1.03	1	-1.36	0.05	-1.58	0.00664	82	82	66	76.67	79	86	62	54	70.25	39	61	54	46	50	46	31	40	48	41.25
gene:ENSCGRG00001012135	ENSCGRG00001012135			SIGN	1.19	0.36	-1.26	0.00907	2.03	0	15761	17558	15200	16173	22105	17278	20384	18224	19497.8	13637	9954	11971	12880	12110.5	26133	31153	22609	40700	30148.8
gene:ENSCGRG00001012360	ENSCGRG00001012360			SIGN	-1.12	1	1.23	0.85	-3.83	1.22e-05	31	30	26	29	25	33	25	24	26.75	18	41	36	45	35	5	7	6	3	5.25
gene:ENSCGRG00001012453	ENSCGRG00001012453			SIGN	-1.27	0.6	-1.35	0.05	-1.68	0.00135	88	88	65	80.33	71	59	62	64	64	46	62	57	62	56.75	47	28	40	51	41.5
gene:ENSCGRG00001012817	ENSCGRG00001012817			SIGN	1.03	1	1.01	1	2.41	0.03	5	8	5	6	9	5	7	4	6.25	3	3	9	8	5.75	14	12	9	12	11.75
gene:ENSCGRG00001012986	ENSCGRG00001012986			SIGN	-1.07	1	-1.11	1	5.65	2.7e-09	9	5	9	7.67	7	8	8	9	8	5	9	4	11	7.25	32	47	26	62	41.75
gene:ENSCGRG00001013239	ENSCGRG00001013239			SIGN	-1.17	1	-1.18	0.91	-2.07	0.00703	50	36	36	40.67	40	40	29	35	36	34	31	26	42	33.25	18	20	9	22	17.25
gene:ENSCGRG00001013403	ENSCGRG00001013403			SIGN	1.07	1	1.29	7.17e-06	2.08	0	2450	1662	1672	1928	2454	1932	1714	2261	2090.25	2144	2489	2344	2340	2329.25	3164	3228	3165	3293	3212.5
gene:ENSCGRG00001014075	ENSCGRG00001014075			SIGN	1.18	1	1.34	0.5	1.75	0.00507	36	30	18	28	24	41	29	52	36.5	35	41	33	47	39	35	38	45	60	44.5
gene:ENSCGRG00001014404	ENSCGRG00001014404			SIGN	-1.15	1	1.09	1	-2.32	6.63e-10	120	100	74	98	83	78	91	96	87	83	99	124	102	102	33	35	33	56	39.25
gene:ENSCGRG00001014492	ENSCGRG00001014492			SIGN	1.14	0.62	1.08	0.69	1.52	4.29e-11	502	468	435	468.33	523	482	571	701	569.25	463	492	486	572	503.25	616	561	540	620	584.25
gene:ENSCGRG00001014769	ENSCGRG00001014769			SIGN	-1.03	1	1.12	1	1.52	0.03	43	40	47	43.33	48	46	37	37	42	37	40	56	50	45.75	52	66	41	84	60.75
gene:ENSCGRG00001015210	ENSCGRG00001015210			SIGN	1.02	1	-1.77	0.22	1.99	0.02	14	9	13	12	15	11	11	13	12.5	2	7	10	7	6.5	22	20	16	19	19.25
gene:ENSCGRG00001015345	ENSCGRG00001015345			SIGN	1.19	0.42	1.38	0.000108	1.86	0	2179	1954	1652	1928.33	2613	1896	2227	2576	2328	2333	3084	2235	2447	2524.75	3003	3207	2439	4464	3278.25
gene:ENSCGRG00001015607	ENSCGRG00001015607			SIGN	1.24	1	1.18	1	1.85	0.03	30	17	14	20.33	37	26	19	14	24	29	20	10	24	20.75	29	30	32	40	32.75
gene:ENSCGRG00001015842	ENSCGRG00001015842			SIGN	-2	0.61	-1.94	0.19	-4.18	0.01	14	12	7	11	8	3	4	5	5	4	5	8	2	4.75	3	2	1	1	1.75
gene:ENSCGRG00001016217	ENSCGRG00001016217			SIGN	1.14	0.2	-1.1	0.18	1.82	0	5678	5712	4861	5417	7288	5483	6029	6302	6275.5	4756	4606	4324	4856	4635.5	8174	8290	7382	9479	8331.25
gene:ENSCGRG00001016805	ENSCGRG00001016805			SIGN	1.19	0.07	1.23	0.00131	1.74	0	936	893	805	878	1187	955	1034	1078	1063.5	836	1101	1072	1123	1033	1269	1284	1122	1991	1416.5
gene:ENSCGRG00001016817	ENSCGRG00001016817			SIGN	-2	1	-1.09	1	4.69	0.000606	5	1	3	3	0	3	1	1	1.25	1	5	2	1	2.25	17	9	9	14	12.25
gene:ENSCGRG00001017009	ENSCGRG00001017009			SIGN	-1.1	1	-1.11	0.27	-1.68	0	776	699	645	706.67	690	672	557	662	645.25	498	627	671	610	601.5	359	324	329	328	335
gene:ENSCGRG00001017051	ENSCGRG00001017051			SIGN	1.93	1	-1.29	1	5.04	0.00921	0	2	3	1.67	4	1	5	1	2.75	0	1	3	0	1	3	8	11	2	6
gene:ENSCGRG00001017943	ENSCGRG00001017943			SIGN	1.07	1	1.1	0.42	-1.62	3.93e-11	422	412	406	413.33	491	424	408	423	436.5	366	425	503	404	424.5	221	176	220	256	218.25
gene:ENSCGRG00001018051	ENSCGRG00001018051			SIGN	-1.06	1	-1.12	0.24	-1.52	2.74e-10	623	633	546	600.67	655	558	505	553	567.75	448	536	513	515	503	359	306	286	423	343.5
gene:ENSCGRG00001018342	ENSCGRG00001018342			SIGN	1.21	0.03	-1.11	0.31	2.6	0	785	785	740	770	1069	838	976	909	948	567	644	695	758	666	1587	1737	1516	2491	1832.75
gene:ENSCGRG00001018547	ENSCGRG00001018547			SIGN	-1.14	0.98	-1.16	0.18	-1.97	0	278	272	237	262.33	264	244	192	238	234.5	206	210	212	231	214.75	109	106	106	93	103.5
gene:ENSCGRG00001018566	ENSCGRG00001018566			SIGN	1.34	0.1	1.19	0.31	1.54	1.41e-06	138	158	138	144.67	234	167	199	187	196.75	135	187	149	184	163.75	172	196	170	225	190.75
gene:ENSCGRG00001018658	ENSCGRG00001018658			SIGN	-1.21	1	1.09	1	-2.7	0.000878	18	29	30	25.67	17	26	18	27	22	23	29	30	28	27.5	6	6	11	11	8.5
gene:ENSCGRG00001019088	ENSCGRG00001019088			SIGN	1.11	1	1.1	0.81	-1.66	8.48e-08	223	198	184	201.67	246	222	196	192	214	235	239	157	167	199.5	107	91	95	113	101.5
gene:ENSCGRG00001019286	ENSCGRG00001019286			SIGN	-1.24	0.98	-1.09	1	-2.43	2.56e-09	88	81	79	82.67	86	52	60	72	67.5	59	72	86	72	72.25	31	22	29	38	30
gene:ENSCGRG00001019362	ENSCGRG00001019362			SIGN	1.74	1	2.25	0.09	3.04	0.00851	5	7	3	5	13	5	8	11	9.25	8	15	9	13	11.25	9	8	21	9	11.75
gene:ENSCGRG00001019724	ENSCGRG00001019724			SIGN	1.01	1	-1.31	1.33e-05	-1.78	0	1112	962	894	989.33	1202	937	931	622	923	628	662	798	493	645.25	473	381	487	425	441.5
gene:ENSCGRG00001020011	ENSCGRG00001020011			SIGN	-1.02	1	1.09	1	2.02	0.03	13	14	10	12.33	15	13	13	10	12.75	12	11	10	20	13.25	17	25	18	30	22.5
gene:ENSCGRG00001020073	ENSCGRG00001020073			SIGN	1.26	0.77	1.36	0.05	-1.75	0.00161	68	55	45	56	90	65	56	69	70	77	78	57	66	69.5	29	20	28	14	22.75
gene:ENSCGRG00001020148	ENSCGRG00001020148			SIGN	-1.32	0.52	-1.41	0.04	-1.6	0.00377	78	85	81	81.33	64	64	52	65	61.25	49	51	68	49	54.25	42	51	29	39	40.25
gene:ENSCGRG00001020289	ENSCGRG00001020289			SIGN	-1.08	1	1.06	1	-1.99	0	338	305	331	324.67	341	266	257	334	299.5	284	342	394	275	323.75	129	133	133	164	139.75
gene:ENSCGRG00001020483	ENSCGRG00001020483			SIGN	2.33	1	2.09	0.59	5.86	0.00291	3	1	1	1.67	7	4	2	4	4.25	2	4	3	5	3.5	8	9	8	13	9.5
gene:ENSCGRG00001020486	ENSCGRG00001020486			SIGN	1.05	1	1.03	1	-1.5	2.63e-07	359	320	321	333.33	384	339	350	303	344	286	311	350	313	315	177	161	199	217	188.5
gene:ENSCGRG00001020552	ENSCGRG00001020552			SIGN	12.73	1	16.61	0.45	105.27	0.03	0	0	0	0	4	1	0	0	1.25	1	0	4	1	1.5	7	12	15	25	14.75
gene:ENSCGRG00001021170	ENSCGRG00001021170			SIGN	-1.07	1	-1.05	1	-1.63	2.27e-10	441	335	301	359	388	332	275	343	334.5	288	336	337	314	318.75	212	166	152	219	187.25
gene:ENSCGRG00001021963	ENSCGRG00001021963			SIGN	-1.15	0.56	-1.16	0.07	-1.55	4.42e-10	549	508	446	501	477	494	351	423	436.25	395	392	410	407	401	284	240	258	289	267.75
gene:ENSCGRG00001022425	ENSCGRG00001022425			SIGN	-1.05	1	-1.03	1	-1.52	1.3e-13	1630	1600	1287	1505.67	1604	1488	1273	1277	1410.5	1164	1450	1427	1305	1336.5	833	751	804	935	830.75
gene:ENSCGRG00001022800	ENSCGRG00001022800			SIGN	-1.07	1	1.19	0.13	-1.53	0.000511	180	179	160	173	183	166	144	154	161.75	174	196	203	196	192.25	120	76	77	89	90.5
gene:ENSCGRG00001022902	ENSCGRG00001022902			SIGN	-1.14	1	1.14	1	-2.46	0.02	16	21	13	16.67	18	11	14	13	14	18	16	20	14	17	5	7	4	3	4.75
gene:ENSCGRG00001023822	ENSCGRG00001023822			SIGN	-1.69	1	-2.18	0.3	-4.7	0.03	12	7	6	8.33	7	8	2	0	4.25	0	4	4	4	3	0	2	2	0	1
gene:ENSCGRG00001024024	ENSCGRG00001024024			SIGN	-1.23	0.19	-1.48	9.68e-07	-3.45	0	2903	2426	2271	2533.33	2028	2276	1857	2311	2118	1667	1423	1683	1826	1649.75	732	503	546	784	641.25
gene:ENSCGRG00001024056	ENSCGRG00001024056			SIGN	1.04	1	1.09	0.95	-2.7	2.45e-11	92	93	78	87.67	98	106	79	74	89.25	79	91	89	92	87.75	28	24	26	37	28.75
gene:ENSCGRG00001024456	ENSCGRG00001024456			SIGN	1.18	0.22	1.34	7.42e-06	1.57	2.11e-13	494	556	479	509.67	617	580	627	647	617.75	561	687	651	755	663.5	658	672	602	1024	739
gene:ENSCGRG00001024498	ENSCGRG00001024498			SIGN	1.16	1	1.11	0.92	1.55	0.000861	66	61	59	62	76	68	70	82	74	65	71	59	71	66.5	78	77	77	117	87.25
gene:ENSCGRG00001024520	ENSCGRG00001024520			SIGN	-1.47	1	-7.02	0.7	12.08	0.000264	1	1	1	1	1	1	0	0	0.5	0	0	0	0	0	11	9	13	11	11
gene:ENSCGRG00001024628	ENSCGRG00001024628			SIGN	1.18	1	1.16	0.51	1.71	8.97e-10	153	143	107	134.33	147	142	159	226	168.5	153	161	142	160	154	176	178	201	209	191
gene:ENSCGRG00001024877	ENSCGRG00001024877			SIGN	2.95	1	2.32	0.6	5.43	0.01	2	1	1	1.33	7	2	3	2	3.5	2	1	7	0	2.5	8	4	7	11	7.5
gene:ENSCGRG00001024881	ENSCGRG00001024881			SIGN	1.19	1	1.24	0.19	1.52	2.86e-05	128	117	96	113.67	137	136	123	166	140.5	122	128	157	141	137	127	140	150	152	142.25
Gigyf1	ENSCGRG00001004356			SIGN	-1.09	1	-1.01	1	-2.18	0	517	414	353	428	454	404	343	300	375.25	335	441	391	337	376	170	159	142	218	172.25
Gigyf2	ENSCGRG00001023425			SIGN	-1.02	1	1.1	0.33	-1.99	0	1190	1150	936	1092	1195	1036	998	1009	1059.5	1059	1211	1055	1126	1112.75	507	408	410	631	489
Gjb3	ENSCGRG00001000865			SIGN	-1.03	1	-1.02	1	-1.53	3.15e-12	1066	957	717	913.33	1093	915	675	709	848	840	886	736	707	792.25	523	467	441	495	481.5
Glis3	ENSCGRG00001014233			SIGN	1.06	1	1.08	0.71	1.54	1.67e-11	468	473	382	441	538	468	445	412	465.75	384	454	448	482	442	551	563	519	681	578.5
Glyctk	ENSCGRG00001022910			SIGN	-1.07	1	-1.31	0.47	-1.89	0.00991	49	44	37	43.33	40	45	36	35	39	30	40	23	25	29.5	20	20	15	31	21.5
Gpatch3	ENSCGRG00001002930			SIGN	-1.02	1	-1.08	0.78	-1.76	6.87e-10	251	223	191	221.67	266	211	201	165	210.75	163	198	189	186	184	113	92	99	156	115
Gpr160	ENSCGRG00001011099			SIGN	-1.17	1	1.22	1	3.75	0.02	2	2	3	2.33	2	3	0	3	2	2	4	3	2	2.75	11	5	6	5	6.75
Gpr18	ENSCGRG00001007477			SIGN	-1.54	1	-1.68	0.58	2.53	0.00745	9	6	6	7	7	2	2	9	5	3	5	6	3	4.25	16	15	12	10	13.25
Gprasp2	ENSCGRG00001005359			SIGN	1.04	1	-1.48	0.98	4.76	7.74e-05	6	1	5	4	6	4	2	5	4.25	2	4	2	2	2.5	15	19	13	18	16.25
Gprc5a	ENSCGRG00001013909			SIGN	-1.09	1	-1.06	0.99	-1.64	2.02e-10	411	357	273	347	334	300	304	323	315.25	303	302	328	287	305	199	139	171	200	177.25
Gtf2e1	ENSCGRG00001013030			SIGN	-1.01	1	-1	1	-1.51	7e-12	1091	1056	822	989.67	1047	983	933	920	970.75	832	1020	889	918	914.75	528	538	508	592	541.5
Gtpbp2	ENSCGRG00001006422			SIGN	-1.06	1	-1.09	0.6	-1.97	0	513	435	326	424.67	474	411	336	386	401.75	320	374	376	389	364.75	193	151	172	235	187.75
Gtse1	ENSCGRG00001022761			SIGN	-1	1	-1.05	0.92	-1.53	2.34e-14	1727	1663	1402	1597.33	1731	1521	1556	1573	1595.25	1232	1475	1560	1468	1433.75	923	762	829	905	854.75
Has1	ENSCGRG00001006095			SIGN	3.8	1	1.09	1	20.11	0.00667	0	1	0	0.33	2	1	2	0	1.25	0	0	1	0	0.25	7	9	6	14	9
Has3	ENSCGRG00001009671			SIGN	1.49	1	1.58	0.36	2.84	0.00051	7	9	10	8.67	14	12	12	14	13	9	17	14	12	13	27	16	17	24	21
Haspin	ENSCGRG00001010278			SIGN	-1.15	1	1.1	0.89	-1.57	0.000471	136	159	148	147.67	157	116	118	129	130	107	187	161	164	154.75	85	66	77	94	80.5
Hbegf	ENSCGRG00001016485			SIGN	1.31	0.00566	-1.19	0.09	2.98	0	335	263	217	271.67	411	307	375	312	351.25	198	195	227	225	211.25	604	746	589	1090	757.25
Hes1	ENSCGRG00001002910			SIGN	1.05	1	-1.06	1	3.35	0	146	160	134	146.67	141	166	147	176	157.5	126	125	148	133	133	344	397	450	485	419
Hexim1	ENSCGRG00001002270			SIGN	1.09	1	1.24	0.00133	-1.69	0	693	654	669	672	787	755	649	704	723.75	707	847	806	726	771.5	342	294	324	348	327
Hhipl1	ENSCGRG00001023233			SIGN	-1.2	1	-1.29	0.19	-1.56	0.00905	77	76	74	75.67	59	78	58	52	61.75	51	56	52	56	53.75	42	41	34	51	42
Hif1an	ENSCGRG00001019981			SIGN	-1.15	0.77	-1.06	0.96	-1.51	2.03e-06	273	270	233	258.67	261	222	204	191	219.5	216	230	222	222	222.5	138	136	139	169	145.5
Hlx	ENSCGRG00001023360			SIGN	-1	1	1.07	1	-1.88	1.07e-06	144	149	118	137	152	138	128	128	136.5	138	129	137	143	136.75	66	64	45	110	71.25
Hoxa1	ENSCGRG00001018306			SIGN	-1.59	1	-1.27	0.92	-3.55	0.00793	15	14	12	13.67	7	11	6	9	8.25	10	7	15	7	9.75	6	2	1	8	4.25
Hoxa3	ENSCGRG00001023867			SIGN	-1.17	1	1.01	1	-1.96	0.00543	58	44	35	45.67	44	45	40	24	38.25	40	33	43	52	42	20	16	20	20	19
Hoxa7	ENSCGRG00001019884			SIGN	-1.25	1	-1.17	0.68	-1.73	0.000475	78	69	62	69.67	73	53	42	46	53.5	52	60	54	46	53	35	28	34	41	34.5
Hoxc4	ENSCGRG00001013095			SIGN	1.01	1	-1.07	1	-1.5	0.000163	154	169	137	153.33	172	162	142	129	151.25	135	143	116	128	130.5	85	76	85	111	89.25
Hoxc6	ENSCGRG00001014416			SIGN	-1.01	1	1.3	0.42	-1.95	0.00804	43	43	40	42	42	47	35	41	41.25	42	49	65	48	51	16	18	18	21	18.25
Hps6	ENSCGRG00001010957			SIGN	-1.41	0.000555	-1.31	0.00307	-3.98	0	242	252	206	233.33	177	158	161	170	166.5	149	163	192	167	167.75	74	24	50	56	51
Hspb8	ENSCGRG00001015702			SIGN	1.28	0.04	1.39	8.02e-05	2.22	0	2714	2591	2384	2563	3834	2748	3351	2986	3229.75	2568	4143	3313	3144	3292	4527	5172	4080	8141	5480
Htr2b	ENSCGRG00001024194			SIGN	1.85	1	2	0.99	9.09	0.01	1	1	0	0.67	1	2	1	0	1	1	2	1	0	1	5	7	5	8	6.25
Hyal2	ENSCGRG00001022911			SIGN	-1.03	1	-1.09	0.35	-2.22	0	1317	1256	922	1165	1277	1211	927	1034	1112.25	920	1007	1027	931	971.25	526	330	415	520	447.75
Iba57	ENSCGRG00001007484			SIGN	-1.51	0.09	-1.1	1	-2.01	0.00031	65	61	38	54.67	45	35	28	44	38	44	53	41	57	48.75	20	22	23	33	24.5
Id1	ENSCGRG00001015899			SIGN	1.45	0.00081	1.03	1	2.47	0	372	294	268	311.33	570	398	412	324	426	262	371	252	242	281.75	591	622	638	1077	732
Il6	ENSCGRG00001024135			SIGN	1.09	1	-1.18	0.68	1.8	3.06e-05	72	54	44	56.67	65	56	66	69	64	46	42	46	51	46.25	90	89	66	106	87.75
Imp3	ENSCGRG00001001326			SIGN	-1.22	0.09	-1.46	1.45e-07	-2.48	0	491	438	315	414.67	407	352	257	284	325	273	279	239	218	252.25	163	111	127	172	143.25
Impg2	ENSCGRG00001007680			SIGN	-2.34	1	1.39	1	5.62	0.04	2	1	0	1	0	1	0	0	0.25	1	1	2	0	1	3	6	6	12	6.75
Inpp5j	ENSCGRG00001022460			SIGN	-1.12	1	1.08	1	-1.7	2.91e-05	117	101	101	106.33	122	81	80	98	95.25	88	117	121	104	107.5	56	38	58	58	52.5
Ints5	ENSCGRG00001020963			SIGN	-1.08	1	1.12	0.22	-1.68	0	839	745	641	741.67	735	710	580	716	685.25	710	839	817	713	769.75	386	323	354	436	374.75
Irf2bpl	ENSCGRG00001024769			SIGN	-1.06	1	1.02	1	-1.61	4.03e-09	302	334	265	300.33	332	283	263	275	288.25	260	288	284	339	292.75	157	124	168	162	152.75
Irx3	ENSCGRG00001022254			SIGN	-1	1	1.04	1	-1.96	0	307	312	217	278.67	329	285	237	245	274	247	273	270	279	267.25	109	120	111	155	123.75
Itfg2	ENSCGRG00001020885			SIGN	-1.06	1	-1.16	0.16	-1.51	6.15e-07	321	311	266	299.33	317	307	229	240	273.25	242	238	242	206	232	173	161	144	196	168.5
Itprip	ENSCGRG00001015730			SIGN	-1.16	1	-1.12	0.6	-1.71	2.09e-05	166	156	121	147.67	147	134	112	103	124	130	113	112	124	119.75	79	52	77	69	69.25
Itpripl2	ENSCGRG00001007234			SIGN	-1.17	0.6	-1.24	0.02	-1.84	2.66e-13	329	312	224	288.33	270	282	206	162	230	238	206	184	171	199.75	156	110	111	121	124.5
Jade2	ENSCGRG00001020286			SIGN	1.02	1	-1.03	1	-1.61	1.46e-08	295	292	248	278.33	343	300	239	245	281.75	254	215	265	269	250.75	173	113	132	123	135.25
Jade3	ENSCGRG00001006355			SIGN	1.06	1	-1.05	1	1.54	1.93e-08	248	239	195	227.33	298	220	212	249	244.75	154	232	217	222	206.25	267	293	282	326	292
Jarid2	ENSCGRG00001021058			SIGN	-1.02	1	-1.06	1	-1.51	1.01e-06	294	314	249	285.67	274	304	272	291	285.25	228	272	251	288	259.75	183	131	143	181	159.5
Jrk	ENSCGRG00001008321			SIGN	-1.33	0.16	-1.14	0.59	-1.98	1.24e-07	106	117	87	103.33	88	89	61	80	79.5	68	89	91	102	87.5	48	42	35	79	51
Jrkl	ENSCGRG00001010876			SIGN	1.07	1	1.19	0.28	1.51	0.000121	214	139	159	170.67	212	152	181	179	181	155	211	205	183	188.5	229	212	180	280	225.25
Junb	ENSCGRG00001015135			SIGN	1.1	1	-1.41	1.43e-08	2.84	0	962	813	705	826.67	998	906	855	770	882.25	545	532	535	502	528.5	1910	1842	1888	2141	1945.25
Kbtbd4	ENSCGRG00001023919			SIGN	1	1	1.2	0.03	-1.6	2.6e-06	404	338	299	347	436	314	312	319	345.25	318	433	398	393	385.5	177	223	128	317	211.25
Kbtbd8	ENSCGRG00001004948			SIGN	1.25	0.05	-1.04	1	1.5	5.49e-08	255	253	251	253	377	272	316	326	322.75	211	231	235	248	231.25	301	318	299	421	334.75
Kcnd2	ENSCGRG00001013210			SIGN	1.71	1	3.12	0.08	5	0.000557	6	0	3	3	6	2	7	6	5.25	7	15	5	9	9	14	15	8	19	14
Kcnip3	ENSCGRG00001013000			SIGN	-1.21	1	-1.21	0.52	-1.72	0.0033	62	68	51	60.33	54	52	49	48	50.75	45	44	45	56	47.5	18	38	28	34	29.5
Kcnk5	ENSCGRG00001020146			SIGN	1.37	0.00456	1.06	1	1.65	4.65e-09	159	164	134	152.33	235	197	216	169	204.25	125	160	154	152	147.75	198	220	186	340	236
Kctd12b	ENSCGRG00001004538			SIGN	-1.01	1	-1.03	1	-1.87	0.01	48	42	42	44	48	51	37	42	44.5	35	36	45	48	41	19	16	22	29	21.5
Kdf1	ENSCGRG00001003180			SIGN	-1.07	1	-3.09	1	58.54	4.73e-05	1	0	0	0.33	0	0	1	0	0.25	0	0	0	0	0	17	23	26	13	19.75
Khnyn	ENSCGRG00001018356			SIGN	-1.22	0.83	-1.04	1	-1.83	2.87e-08	158	144	140	147.33	142	131	99	113	121.25	145	126	117	143	132.75	74	57	64	75	67.5
Kifc2	ENSCGRG00001014384			SIGN	-1.06	1	1.21	0.77	-2.4	0.000779	40	41	39	40	40	34	36	34	36	34	60	46	34	43.5	17	11	12	15	13.75
Kin	ENSCGRG00001018259			SIGN	1.22	0.17	1.33	0.000566	1.62	1.13e-10	236	223	237	232	321	247	295	299	290.5	229	312	322	325	297	311	325	270	405	327.75
Klb	ENSCGRG00001018998			SIGN	6.86	0.09	4.43	0.11	22.63	1.07e-06	3	0	0	1	13	6	6	3	7	5	4	2	5	4	23	21	17	41	25.5
Klhl25	ENSCGRG00001012399			SIGN	-1.06	1	-1.1	0.66	-2.4	0	191	186	165	180.67	194	176	149	138	164.25	144	152	156	137	147.25	65	63	53	80	65.25
Kmt2b	ENSCGRG00001023704			SIGN	1.08	1	1.17	0.03	-1.98	0	861	811	664	778.67	975	794	750	712	807.75	751	928	876	731	821.5	375	281	293	383	333
Kmt5c	ENSCGRG00001006665			SIGN	-1.08	1	1.11	0.81	-2.47	2.25e-09	87	93	65	81.67	80	77	74	65	74	80	82	90	80	83	27	28	24	34	28.25
Krt7	ENSCGRG00001013984			SIGN	-1.18	1	-1.2	1	-2.37	0.02	16	13	21	16.67	14	16	15	8	13.25	13	8	16	12	12.25	8	4	5	11	7
Lcor	ENSCGRG00001020516			SIGN	1.01	1	1.05	1	1.87	1.86e-06	62	71	66	66.33	62	62	82	58	66	64	63	66	66	64.75	105	108	85	116	103.5
Lcorl	ENSCGRG00001007598			SIGN	1.15	1	1.22	0.44	1.76	1.58e-05	70	81	60	70.33	73	92	93	73	82.75	79	66	80	107	83	129	82	88	109	102
Ldlrap1	ENSCGRG00001003725			SIGN	-1.06	1	-1.01	1	-1.54	1.01e-05	213	211	145	189.67	215	174	144	162	173.75	172	173	177	156	169.5	118	85	92	119	103.5
Lemd3	ENSCGRG00001000700			SIGN	-1.08	1	-1.01	1	-1.61	1.69e-10	409	435	345	396.33	391	365	352	355	365.75	365	392	330	384	367.75	191	202	200	254	211.75
Leng8	ENSCGRG00001023984			SIGN	1.14	0.72	1.02	1	-1.69	1.5e-12	443	434	329	402	527	443	441	343	438.5	376	347	395	352	367.5	204	184	184	241	203.25
Lfng	ENSCGRG00001017609			SIGN	1.06	1	-1.01	1	-3.45	0	405	407	302	371.33	428	396	373	377	393.5	297	342	376	363	344.5	80	92	86	173	107.75
Lime1	ENSCGRG00001016932			SIGN	-1.06	1	1.23	0.45	-1.95	0.00287	56	56	48	53.33	64	49	44	44	50.25	38	75	65	68	61.5	22	15	29	21	21.75
Limk2	ENSCGRG00001012435			SIGN	-1.09	1	-1.09	0.7	-1.52	5.96e-07	275	295	268	279.33	325	256	205	235	255.25	232	253	227	238	237.5	170	122	152	164	152
Lipt1	ENSCGRG00001002192			SIGN	-1.18	1	1.24	0.77	-2.69	0.00126	42	39	21	34	26	24	33	33	29	39	45	37	38	39.75	13	5	12	11	10.25
Lmbr1l	ENSCGRG00001008575			SIGN	1.03	1	1	1	-2.75	1.4e-13	119	111	87	105.67	127	103	100	108	109.5	98	94	100	107	99.75	30	34	28	47	34.75
Lmtk3	ENSCGRG00001012481			SIGN	1.02	1	1.02	1	-1.66	1.5e-05	148	125	104	125.67	134	122	127	118	125.25	104	117	142	106	117.25	62	61	59	77	64.75
Lpar6	ENSCGRG00001011474			SIGN	1.03	1	-1.16	0.65	-3.05	7.89e-12	103	80	87	90	103	75	101	93	93	63	83	75	70	72.75	24	26	21	28	24.75
Lpcat1	ENSCGRG00001005110			SIGN	-1	1	1.09	0.99	-1.54	0.00216	85	102	75	87.33	95	89	76	80	85	79	86	103	80	87	47	42	47	47	45.75
Lrfn3	ENSCGRG00001020339			SIGN	-1.21	0.78	-1.03	1	-1.85	1.72e-05	123	111	84	106	97	89	81	77	86	91	93	97	96	94.25	55	35	48	59	49.25
Lrfn4	ENSCGRG00001017073			SIGN	-1.03	1	-1.26	0.000123	-1.59	0	1394	1339	1113	1282	1414	1266	1077	1138	1223.75	868	985	973	909	933.75	707	577	664	754	675.5
Lrit3	ENSCGRG00001024786			SIGN	1.91	1	1.11	1	26.41	5.34e-13	2	2	2	2	6	3	2	6	4.25	1	4	2	2	2.25	40	41	56	66	50.75
Lrrc4	ENSCGRG00001003915			SIGN	1.34	1	1.06	1	10.84	0.00573	1	0	1	0.67	0	0	2	2	1	0	2	1	0	0.75	8	4	9	7	7
Lurap1l	ENSCGRG00001018238			SIGN	1.01	1	1.23	0.08	-1.61	5.96e-05	132	135	105	124	129	149	105	114	124.25	129	146	147	146	142	63	56	67	67	63.25
Mab21l1	ENSCGRG00001011548			SIGN	2.63	1	1.54	1	23.95	0.00327	0	0	1	0.33	1	1	1	1	1	1	0	1	0	0.5	8	8	11	3	7.5
Mamdc4	ENSCGRG00001011748			SIGN	-1.03	1	1.03	1	-1.74	5.04e-10	279	245	183	235.67	257	230	191	228	226.5	202	231	255	212	225	115	96	114	118	110.75
Map10	ENSCGRG00001014469			SIGN	-1.51	0.09	1.02	1	-1.64	0.00463	71	79	55	68.33	52	56	28	48	46	65	70	58	71	66	37	25	38	35	33.75
Map3k11	ENSCGRG00001016647			SIGN	-1.07	1	-1.08	0.55	-1.72	0	740	747	622	703	764	653	571	592	645	601	630	573	576	595	390	301	293	357	335.25
Map3k14	ENSCGRG00001000574			SIGN	1.11	1	-1.05	0.94	-2.06	0	588	607	456	550.33	686	620	530	548	596	454	475	528	451	477	247	194	201	300	235.5
Map4k2	ENSCGRG00001001954			SIGN	1.21	0.91	1.35	0.02	-2.12	4.25e-08	129	127	96	117.33	163	137	112	139	137.75	134	169	155	116	143.5	49	35	49	57	47.5
Mapk8ip3	ENSCGRG00001009625			SIGN	1.01	1	-1.03	1	-3.07	0	564	475	385	474.67	554	467	432	385	459.5	322	464	489	374	412.25	147	99	126	153	131.25
March9	ENSCGRG00001012220			SIGN	-1.05	1	1.13	0.59	-1.65	2.07e-05	121	128	121	123.33	121	109	109	140	119.75	123	137	145	128	133.25	57	54	70	79	65
Mark2	ENSCGRG00001010551			SIGN	-1.05	1	-1.17	0.03	-1.51	6.5e-12	1046	1032	896	991.33	1036	1017	845	842	935	744	775	815	815	787.25	572	507	504	635	554.5
Mcf2l	ENSCGRG00001023772			SIGN	-1.07	1	1.27	0.00147	-1.7	2e-12	401	385	349	378.33	368	344	344	376	358	431	430	489	478	457	184	166	188	207	186.25
Mcl1	ENSCGRG00001017446			SIGN	1.26	0.00142	1.01	1	1.94	0	1108	818	728	884.67	1134	1153	1095	1013	1098.75	673	859	945	847	831	1412	1495	1192	1678	1444.25
Mcrip1	ENSCGRG00001015558			SIGN	-1.22	0.44	-1.16	0.35	-1.7	1.99e-05	210	161	108	159.67	148	138	108	111	126.25	144	133	99	119	123.75	82	86	56	95	79.75
Megf8	ENSCGRG00001015887			SIGN	-1.05	1	1.12	0.15	-1.52	4.54e-12	1134	1074	759	989	1034	1063	772	795	916	971	1064	1009	970	1003.5	599	427	541	544	527.75
Mettl18	ENSCGRG00001002456			SIGN	-1.07	1	1.12	0.66	-2.79	2.01e-13	105	96	103	101.33	102	88	89	124	100.75	86	114	128	130	114.5	29	25	34	43	32.75
Mex3a	ENSCGRG00001000412			SIGN	1.04	1	-1.26	0.12	-2.07	8.34e-09	138	182	121	147	156	156	153	125	147.5	114	107	99	102	105.5	70	52	48	73	60.75
MFT	ENSCGRG00001006441			SIGN	1.04	1	-1.21	0.05	-1.81	3.31e-12	281	287	235	267.67	282	296	265	274	279.25	166	187	268	222	210.75	120	129	107	128	121
Mid1ip1	ENSCGRG00001009863			SIGN	-1.26	0.15	-1.19	0.15	-1.76	3.3e-09	220	210	159	196.33	170	170	139	128	151.75	158	157	134	151	150	106	69	93	75	85.75
Midn	ENSCGRG00001012917			SIGN	-1.03	1	-1.39	2.57e-07	-2.15	0	727	794	643	721.33	716	762	694	604	694	478	471	458	517	481	244	306	258	411	304.75
Miga2	ENSCGRG00001023379			SIGN	1.02	1	1.05	0.99	-1.54	3.77e-09	466	491	351	436	512	446	395	406	439.75	401	445	418	427	422.75	255	232	194	250	232.75
Mis12	ENSCGRG00001009038			SIGN	-1.05	1	1.07	1	-1.82	0.00319	49	58	43	50	47	39	52	56	48.5	39	62	54	51	51.5	28	19	19	38	26
Mlh3	ENSCGRG00001018094			SIGN	-1.01	1	1.22	0.26	-1.55	0.0021	128	98	113	113	134	110	104	104	113	112	147	115	145	129.75	62	61	53	74	62.5
Mllt6	ENSCGRG00001021735			SIGN	-1.08	1	-1.03	1	-1.98	0	1095	1055	775	975	1009	941	779	768	874.25	845	887	886	780	849.5	434	351	398	404	396.75
Mnt	ENSCGRG00001021405			SIGN	-1.15	0.71	-1.21	0.03	-1.72	4.28e-12	333	357	308	332.67	296	286	296	275	288.25	262	237	267	260	256.5	151	151	164	154	155
Mob3c	ENSCGRG00001011170			SIGN	-1.01	1	-1.2	0.37	-1.57	0.00559	81	102	69	84	75	85	88	86	83.5	52	74	74	67	66.75	37	42	50	43	43
Mocs3	ENSCGRG00001003680			SIGN	1.12	1	1.07	1	1.52	0.000616	147	99	85	110.33	117	131	98	159	126.25	73	92	205	103	118.25	148	141	113	91	123.25
Mrm3	ENSCGRG00001014632			SIGN	-1.06	1	1.05	1	-1.73	2.01e-13	398	428	353	393	414	346	344	404	377	360	383	418	414	393.75	210	162	176	231	194.75
Mst1r	ENSCGRG00001021775			SIGN	-1.16	0.55	-1.36	8.3e-05	-1.59	2.87e-09	381	352	290	341	339	306	265	285	298.75	190	227	261	281	239.75	184	181	150	182	174.25
Mtx3	ENSCGRG00001011412			SIGN	-1.02	1	1.05	1	-1.54	0.03	54	49	41	48	48	59	47	35	47.25	31	49	50	61	47.75	27	24	24	39	28.5
Mul1	ENSCGRG00001024511			SIGN	-1.1	1	-1.03	1	-1.56	5.17e-09	428	393	303	374.67	387	347	310	326	342.5	308	348	344	372	343	212	169	197	260	209.5
Myorg	ENSCGRG00001005455			SIGN	-1.46	0.6	-1.51	0.1	-3.37	6.9e-08	59	67	48	58	50	49	25	31	38.75	40	29	33	37	34.75	15	15	11	16	14.25
Nacad	ENSCGRG00001013416			SIGN	1.32	1	1.72	0.07	2.55	4.29e-10	55	32	21	36	57	30	39	51	44.25	42	75	67	32	54	72	81	67	146	91.5
Nanp	ENSCGRG00001002985			SIGN	-1.34	0.00619	-1.02	1	-1.59	2.47e-07	272	234	188	231.33	193	202	133	172	175	195	232	190	243	215	108	112	130	127	119.25
Nbeal2	ENSCGRG00001019565			SIGN	-1.02	1	1.11	0.5	-1.64	6.29e-09	311	269	220	266.67	296	261	224	227	252	269	282	272	241	266	149	120	122	165	139
Nckap5l	ENSCGRG00001013558			SIGN	1.08	1	1.03	1	-1.63	1.28e-12	521	574	472	522.33	621	536	585	529	567.75	470	462	546	554	508	323	224	232	315	273.5
Nckipsd	ENSCGRG00001022184			SIGN	1.02	1	1.29	0.13	-1.51	0.01	98	76	81	85	95	86	80	73	83.5	76	104	130	84	98.5	40	45	51	65	50.25
ND2	ENSCGRG00001000010			SIGN	1.09	1	1.32	0.00105	1.69	0	39922	28724	26423	31689.7	41180	32046	29677	36601	34876	30314	43988	42364	41241	39476.8	43772	44388	39268	40165	41898.2
ND3	ENSCGRG00001000025			SIGN	1.03	1	1.21	0.000854	1.65	0	3286	2557	2211	2684.67	3214	2472	2439	2900	2756.25	2631	3569	3050	2892	3035.5	3913	3405	3267	3704	3572.25
ND4L	ENSCGRG00001000027			SIGN	1.08	1	1.48	6.26e-07	1.63	2.19e-10	7030	5067	3634	5243.67	6905	5713	3979	5743	5585	6694	8880	6154	6538	7066.5	6765	7205	5995	4943	6227
ND5	ENSCGRG00001000032			SIGN	-1	1	1.23	0.03	1.72	4.68e-13	16394	11794	11127	13105	15677	12135	11126	14260	13299.5	13019	16686	15382	15853	15235	16561	19368	17913	18784	18156.5
ND6	ENSCGRG00001000033			SIGN	-1.04	1	1.11	0.56	1.59	0	4708	3136	3029	3624.33	4258	3219	2877	3910	3566	3261	4223	3743	3895	3780.5	4647	4687	4358	4824	4629
Ndst2	ENSCGRG00001010115			SIGN	-1.01	1	-1.09	0.5	-1.84	0	745	748	601	698	695	766	610	694	691.25	552	626	626	603	601.75	316	275	323	320	308.5
NDUFA1	ENSCGRG00001004710			SIGN	1.14	1	1.14	0.51	1.52	6.18e-08	247	219	210	225.33	285	211	254	307	264.25	244	276	224	238	245.5	284	261	282	304	282.75
Nek8	ENSCGRG00001017418			SIGN	-1.16	1	-1.26	0.04	-1.73	1.38e-07	178	156	153	162.33	153	144	127	124	137	107	122	133	110	118	77	74	76	99	81.5
Neu3	ENSCGRG00001022920			SIGN	-1.31	0.26	-1.06	1	-2.55	2.1e-11	105	93	91	96.33	75	69	74	85	75.75	89	84	84	94	87.75	32	28	31	46	34.25
Nfe2l3	ENSCGRG00001020882			SIGN	2.12	0.98	1.73	0.63	6.33	2.67e-07	4	5	3	4	9	5	13	4	7.75	2	12	5	5	6	29	13	21	22	21.25
Nfil3	ENSCGRG00001011593			SIGN	1.28	0.84	1.41	0.04	1.71	0.000174	50	72	54	58.67	90	53	85	69	74.25	76	73	82	76	76.75	93	88	60	133	93.5
Nfkbiz	ENSCGRG00001019170			SIGN	-1.28	0.85	-1.27	0.26	2.95	0	89	76	55	73.33	62	59	47	66	58.5	53	55	57	54	54.75	156	215	148	365	221
Nkrf	ENSCGRG00001001105			SIGN	-1.16	0.37	1.04	1	-1.76	0	519	545	472	512	455	486	384	471	449	435	552	514	543	511	274	185	246	256	240.25
Nlgn3	ENSCGRG00001000542			SIGN	3.65	0.83	3.64	0.23	10.25	0.000892	1	0	2	1	4	7	3	0	3.5	3	4	2	4	3.25	11	7	10	14	10.5
Nod1	ENSCGRG00001006286			SIGN	-1.07	1	1.08	0.69	-1.6	3.41e-11	499	493	403	465	496	449	382	428	438.75	444	481	447	527	474.75	248	215	237	302	250.5
Nr2f1	ENSCGRG00001020383			SIGN	-1.06	1	1.14	0.66	-1.61	0.00121	110	102	98	103.33	105	106	77	91	94.75	99	113	125	94	107.75	64	49	42	62	54.25
Nr3c2	ENSCGRG00001008894			SIGN	1.07	1	1.14	0.45	1.55	2.09e-06	142	141	112	131.67	148	143	145	128	141	127	139	143	156	141.25	178	154	161	179	168
Nr4a1	ENSCGRG00001010137			SIGN	-1.02	1	-1.11	1	2.06	2.66e-07	63	45	41	49.67	51	53	39	54	49.25	30	48	51	41	42.5	81	80	86	131	94.5
Nr4a3	ENSCGRG00001006443			SIGN	1.59	0.82	1.77	0.08	2.2	0.00544	16	23	7	15.33	28	18	28	21	23.75	22	31	22	24	24.75	25	27	29	52	33.25
Nsmf	ENSCGRG00001019298			SIGN	-1.02	1	-1.05	0.85	-1.61	0	1904	1683	1498	1695	1871	1658	1490	1538	1639.25	1335	1530	1620	1478	1490.75	894	761	879	1012	886.5
Nup62	ENSCGRG00001016364			SIGN	-1.04	1	-1.02	1	-1.62	0	1177	1098	915	1063.33	1090	1041	914	984	1007.25	890	1046	1003	926	966.25	570	512	497	575	538.5
Ociad2	ENSCGRG00001021466			SIGN	1.09	1	1.25	0.000531	1.6	0	825	809	637	757	966	717	800	830	828.25	730	1030	895	911	891.5	1005	1042	873	1625	1136.25
Oit3	ENSCGRG00001021921			SIGN	1.03	1	-1.37	1	5.05	0.00146	1	4	2	2.33	2	3	2	2	2.25	1	1	3	1	1.5	5	11	14	11	10.25
Osbpl7	ENSCGRG00001013737			SIGN	-1.06	1	1.13	0.37	-3.85	0	268	258	206	244	251	227	204	220	225.5	227	266	288	226	251.75	59	49	44	38	47.5
Oser1	ENSCGRG00001012353			SIGN	1.22	0.02	1.24	0.000983	1.74	0	721	763	578	687.33	954	771	820	828	843.25	724	822	825	850	805.25	918	1006	951	1387	1065.5
Paqr7	ENSCGRG00001002911			SIGN	-1.23	1	-1.17	0.74	-2.17	0.000487	51	65	47	54.33	48	45	35	62	47.5	40	52	42	54	47	23	15	22	23	20.75
Pars2	ENSCGRG00001013821			SIGN	-1.16	0.6	-1.19	0.06	-2.7	0	310	287	277	291.33	280	254	219	235	247	237	220	227	215	224.75	99	87	74	141	100.25
Patz1	ENSCGRG00001004071			SIGN	-1.12	1	-1.06	1	-1.51	4.9e-06	264	257	180	233.67	234	226	168	188	204	163	217	233	196	202.25	151	107	113	102	118.25
Pde8a	ENSCGRG00001007946			SIGN	1.94	1	-1.11	1	15.04	0.02	1	0	0	0.33	1	1	0	1	0.75	0	1	0	0	0.25	8	7	1	4	5
Peli1	ENSCGRG00001021958			SIGN	1.38	0.00804	1.39	0.000789	1.65	3.36e-08	141	137	110	129.33	225	149	177	166	179.25	142	175	174	186	169.25	170	186	157	230	185.75
Pelo	ENSCGRG00001024665			SIGN	-1.05	1	-1.12	0.32	-1.61	1.19e-09	398	327	308	344.33	371	327	295	367	340	242	313	302	331	297	175	187	154	228	186
Per1	ENSCGRG00001019654			SIGN	-1.05	1	1.07	1	-1.6	1.75e-05	178	146	111	145	163	131	129	121	136	135	130	159	142	141.5	78	67	72	92	77.25
Phf13	ENSCGRG00001024907			SIGN	1.17	0.67	-1.04	1	-1.7	3.47e-08	202	210	165	192.33	214	251	229	198	223	156	167	184	182	172.25	111	91	69	86	89.25
Phkg1	ENSCGRG00001003774			SIGN	1.27	1	1.49	1	6.74	0.00371	0	2	2	1.33	2	2	2	1	1.75	1	3	1	3	2	7	12	4	10	8.25
Phldb1	ENSCGRG00001023739			SIGN	-1.01	1	-1.3	5.48e-07	-1.55	0	5636	5617	4644	5299	6028	5320	4810	4594	5188	3784	3473	3882	3821	3740	3096	2498	2686	3060	2835
Pias4	ENSCGRG00001019465			SIGN	1.08	1	1.15	0.12	-1.75	1.19e-14	496	423	350	423	480	473	406	442	450.25	421	501	454	411	446.75	213	187	180	260	210
Pif1	ENSCGRG00001022422			SIGN	-1.08	1	-1.04	1	-3.18	0	558	550	450	519.33	519	523	422	426	472.5	424	511	447	441	455.75	174	97	126	114	127.75
Pik3r4	ENSCGRG00001014556			SIGN	-1.15	0.27	-1.33	1.98e-06	-2.02	0	1211	1180	974	1121.67	1026	1053	911	974	991	757	775	772	925	807.25	463	427	448	511	462.25
Pik3r5	ENSCGRG00001016158			SIGN	-1.53	0.77	-1.09	1	-1.82	0.04	27	53	30	36.67	19	28	23	29	24.75	34	28	34	35	32.75	17	17	14	29	19.25
Pkd1	ENSCGRG00001020324			SIGN	-1.07	1	1.04	1	-1.72	0	1286	1216	959	1153.67	1251	1133	914	880	1044.5	1040	1045	1208	1011	1076	571	517	528	613	557.25
Plekhm1	ENSCGRG00001018850			SIGN	1.01	1	1.11	0.2	-1.53	5.64e-14	1478	1466	1231	1391.67	1592	1405	1299	1262	1389.5	1341	1398	1534	1427	1425	796	673	721	951	785.25
Plin4	ENSCGRG00001009471			SIGN	-1.01	1	1.17	0.47	-1.71	6.25e-06	136	129	100	121.67	143	115	119	96	118.25	142	112	130	133	129.25	59	57	55	63	58.5
Plpp5	ENSCGRG00001017015			SIGN	1.02	1	-1.26	0.26	-1.66	0.02	69	66	46	60.33	74	60	51	56	60.25	45	46	42	40	43.25	27	19	42	49	34.25
Plpp7	ENSCGRG00001007465			SIGN	-1.26	0.46	-1.32	0.03	-3.06	0	195	180	146	173.67	139	170	119	118	136.5	128	121	103	135	121.75	53	28	56	41	44.5
Pnisr	ENSCGRG00001014264			SIGN	-1.02	1	-1.11	0.29	-1.56	1.47e-12	826	779	680	761.67	836	703	715	695	737.25	573	654	703	609	634.75	419	385	372	493	417.25
Pnrc1	ENSCGRG00001003862			SIGN	1.05	1	1.01	1	-2.4	2.01e-11	124	99	102	108.33	138	112	109	98	114.25	80	103	109	120	103	41	34	34	40	37.25
Polk	ENSCGRG00001013007			SIGN	1.09	1	1.02	1	1.62	1.19e-14	498	510	394	467.33	563	440	554	482	509.75	404	432	481	473	447.5	546	655	619	678	624.5
Polm	ENSCGRG00001014159			SIGN	-1.21	1	-1.1	0.94	-1.64	0.000179	110	102	86	99.33	74	89	73	86	80.5	86	84	92	70	83	57	46	43	62	52
Polrmt	ENSCGRG00001021311			SIGN	-1.05	1	-1.02	1	-1.51	7.29e-13	1517	1464	1162	1381	1531	1354	1080	1205	1292.5	1175	1285	1343	1161	1241	808	684	715	777	746
Ppan	ENSCGRG00001015990			SIGN	-1.18	0.06	1	1	-2.32	0	1885	1604	1339	1609.33	1519	1398	1114	1313	1336	1353	1720	1497	1362	1483	640	522	508	694	591
Ppfia4	ENSCGRG00001024386			SIGN	-1.34	1	-1.79	0.25	-2.99	0.02	16	12	10	12.67	15	7	4	12	9.5	6	5	11	4	6.5	3	2	5	5	3.75
Ppp1r10	ENSCGRG00001020281			SIGN	-1.27	0.000415	1.05	0.83	-1.74	0	1540	1303	1247	1363.33	1112	1170	919	1098	1074.75	1196	1522	1368	1321	1351.75	642	669	581	1061	738.25
Pprc1	ENSCGRG00001011726			SIGN	1.04	1	1.01	1	-1.98	0	3046	2958	2624	2876	3258	3081	2705	2796	2960	2420	2824	2937	2564	2686.25	1253	1181	1066	1460	1240
Pqlc2	ENSCGRG00001021294			SIGN	1.07	1	1.15	0.44	-1.55	0.00144	121	130	115	122	139	133	111	127	127.5	110	144	149	112	128.75	47	70	73	90	70
Prdm16	ENSCGRG00001019996			SIGN	-1.12	1	-1.35	0.03	-1.62	0.000164	174	147	116	145.67	133	140	126	118	129.25	101	104	89	107	100.25	73	67	76	74	72.5
Prickle1	ENSCGRG00001022837			SIGN	-1.06	1	-1.12	1	2.1	4.64e-05	19	31	31	27	30	30	22	29	27.75	24	25	13	38	25	46	41	51	46	46
Prmt6	ENSCGRG00001012887			SIGN	-1.21	0.15	-1.45	4.25e-07	-1.56	4.47e-09	428	401	288	372.33	342	338	261	243	296	248	237	209	222	229	203	179	189	234	201.25
Prps1l1	ENSCGRG00001011587			SIGN	1.93	0.56	1.77	0.25	5.85	7.67e-09	10	6	4	6.67	15	12	10	14	12.75	13	9	13	8	10.75	30	42	22	47	35.25
Prr12	ENSCGRG00001016597			SIGN	-1.07	1	-1.1	0.4	-1.65	0	814	861	669	781.33	819	739	688	609	713.75	634	644	673	649	650	430	354	355	430	392.25
Prr22	ENSCGRG00001022202			SIGN	-1.3	0.62	-1.16	0.65	-2.16	1.5e-06	86	75	83	81.33	71	61	53	74	64.75	60	74	65	73	68	29	30	32	60	37.75
Psd	ENSCGRG00001000373			SIGN	-1.01	1	1.18	0.59	-1.5	0.02	77	60	49	62	77	46	64	53	60	50	80	73	65	67	34	31	34	33	33
Ptgs2	ENSCGRG00001016942			SIGN	1.12	1	1.26	0.01	1.81	0	228	224	188	213.33	258	213	262	248	245.25	219	254	273	291	259.25	301	338	293	616	387
Pwwp2b	ENSCGRG00001016752			SIGN	1.02	1	1.11	0.52	-1.7	1.08e-08	224	221	184	209.67	244	214	196	194	212	216	213	215	216	215	116	93	87	121	104.25
Rab27b	ENSCGRG00001006027			SIGN	1.61	0.97	1.27	0.94	2.16	0.02	13	7	7	9	18	12	16	15	15.25	9	11	10	15	11.25	14	10	24	14	15.5
Rac3	ENSCGRG00001008888			SIGN	1.2	1	1.47	0.5	-2.88	0.04	11	13	9	11	13	9	13	16	12.75	13	15	23	8	14.75	2	2	5	1	2.5
Rai1	ENSCGRG00001000952			SIGN	-1.21	0.33	-1.15	0.29	-1.74	1.07e-09	240	238	201	226.33	230	184	166	169	187.25	172	180	184	203	184.75	105	105	104	87	100.25
Rassf1	ENSCGRG00001020626			SIGN	1.21	0.24	1.17	0.13	-1.86	7.03e-12	238	270	183	230.33	330	285	233	245	273.25	219	265	260	245	247.25	112	95	90	107	101
Rbm15	ENSCGRG00001001004			SIGN	1.08	1	1.16	0.12	1.53	1.07e-09	348	371	249	322.67	423	343	294	276	334	355	350	320	307	333	420	401	360	503	421
Recql5	ENSCGRG00001011255			SIGN	-1.11	1	1.17	0.18	-1.52	2.8e-05	209	170	162	180.33	184	176	126	158	161	183	206	205	189	195.75	104	102	79	136	105.25
Rexo4	ENSCGRG00001013126			SIGN	-1.02	1	1.22	0.00641	-1.73	0	531	518	460	503	544	487	464	434	482.25	577	558	565	550	562.5	261	225	215	315	254
Rhbdf2	ENSCGRG00001009552			SIGN	-1.02	1	-1.08	0.61	-1.59	4.68e-13	697	756	598	683.67	788	644	614	619	666.25	566	577	613	593	587.25	430	283	330	418	365.25
Rhob	ENSCGRG00001001843			SIGN	-1.21	0.9	-1.32	0.05	-2.22	5.45e-09	112	96	80	96	98	73	72	71	78.5	71	73	54	70	67	39	34	31	35	34.75
Rhobtb1	ENSCGRG00001024396			SIGN	-1.13	0.83	-1.07	0.76	-1.72	0	532	569	425	508.67	449	491	428	414	445.5	417	442	460	437	439	251	229	230	251	240.25
Ribc1	ENSCGRG00001016624			SIGN	-1.21	0.98	-1.24	0.21	-1.96	2.11e-08	132	103	122	119	105	108	76	97	96.5	81	101	93	78	88.25	53	42	52	70	54.25
Rin1	ENSCGRG00001021851			SIGN	-1.32	0.03	-1.36	0.00145	-1.71	3.52e-08	218	178	172	189.33	141	155	139	122	139.25	102	137	148	121	127	90	78	100	99	91.75
Rnf145	ENSCGRG00001023959			SIGN	-1.16	0.32	-1.18	0.03	-2.47	0	603	624	520	582.33	551	546	447	477	505.25	438	444	458	520	465	222	152	195	201	192.5
RNF168	ENSCGRG00001020081			SIGN	1.23	0.02	1.23	0.0037	1.58	9.96e-14	560	541	427	509.33	705	581	635	580	625.25	472	644	612	617	586.25	679	699	558	928	716
Rnf25	ENSCGRG00001019945			SIGN	1.01	1	1.04	1	-1.55	1.7e-08	384	348	313	348.33	380	338	339	334	347.75	320	329	362	331	335.5	194	185	162	281	205.5
Rpusd2	ENSCGRG00001009839			SIGN	1.02	1	-1.2	0.07	-2.36	0	301	285	231	272.33	297	291	243	275	276.5	211	198	232	208	212.25	101	96	80	135	103
Rrh	ENSCGRG00001022555			SIGN	1.01	1	-1.28	1	3.21	0.000195	6	10	5	7	5	9	3	12	7.25	8	7	4	2	5.25	19	15	21	28	20.75
Rsbn1	ENSCGRG00001018807			SIGN	-1.02	1	-1.38	0.02	-1.71	7.51e-06	121	136	98	118.33	124	130	113	90	114.25	73	73	78	91	78.75	52	56	58	73	59.75
Sac3d1	ENSCGRG00001001044			SIGN	1	1	-1.28	0.00401	-1.68	2.28e-10	337	273	275	295	272	311	299	311	298.25	184	221	255	218	219.5	147	146	130	150	143.25
Sap25	ENSCGRG00001010999			SIGN	-1.01	1	1.11	0.74	-1.72	7.75e-06	137	113	100	116.67	132	114	101	114	115.25	110	118	136	116	120	59	45	60	54	54.5
Sap30bp	ENSCGRG00001016528			SIGN	1.03	1	1.08	0.62	-1.93	0	564	553	349	488.67	566	537	406	399	477	443	539	481	400	465.75	231	190	184	277	220.5
Saxo2	ENSCGRG00001002633			SIGN	1.25	1	-1.29	1	2.42	0.03	9	2	6	5.67	8	4	8	5	6.25	5	4	5	0	3.5	10	9	15	18	13
Scaf8	ENSCGRG00001020167			SIGN	1.03	1	1.03	1	1.5	5.68e-13	964	960	941	955	1043	989	979	942	988.25	836	934	968	969	926.75	1239	1135	1093	1407	1218.5
Scand1	ENSCGRG00001007054			SIGN	1.59	0.24	1.26	0.59	1.78	2.09e-05	58	48	41	49	58	100	67	117	85.5	49	43	95	69	64	72	71	67	70	70
Selenoh	ENSCGRG00001001580			SIGN	1.21	1	-1.01	1	1.51	0.00619	68	52	70	63.33	65	67	94	96	80.5	62	61	61	66	62.5	82	78	72	82	78.5
Sema4b	ENSCGRG00001021155			SIGN	1.01	1	1.01	1	-1.62	1.47e-12	608	566	458	544	647	547	473	517	546	477	511	530	534	513	321	261	227	349	289.5
Sema4c	ENSCGRG00001024462			SIGN	-1.12	0.8	-1.19	0.03	-1.76	0	638	600	453	563.67	566	523	439	464	498	393	453	458	460	441	296	235	239	279	262.25
Sema6c	ENSCGRG00001003943			SIGN	-1.02	1	-1.19	0.5	-1.55	0.000461	103	124	106	111	117	128	91	101	109.25	87	63	103	99	88	55	55	63	73	61.5
Sephs2	ENSCGRG00001007413			SIGN	-1.1	0.91	-1.04	1	-1.5	3.75e-13	1715	1594	1324	1544.33	1561	1435	1175	1395	1391.5	1345	1490	1372	1312	1379.75	849	790	831	962	858
Setd1b	ENSCGRG00001013241			SIGN	1.06	1	-1.02	1	-2.07	4.14e-08	126	142	115	127.67	134	149	132	107	130.5	108	127	109	105	112.25	58	52	38	35	45.75
Setdb1	ENSCGRG00001010822			SIGN	-1.09	1	-1.09	0.38	-1.5	9.06e-12	1133	1075	909	1039	1017	960	896	950	955.75	828	929	893	923	893.25	623	519	526	737	601.25
Sfswap	ENSCGRG00001011284			SIGN	-1.04	1	-1.12	0.16	-1.52	4.42e-13	1318	1272	1200	1263.33	1302	1270	1131	1245	1237	978	1044	1129	1146	1074.25	755	621	636	810	705.5
Sgk1	ENSCGRG00001022228			SIGN	-1.02	1	-1.01	1	2.65	0	590	443	475	502.67	674	405	454	429	490.5	422	455	471	488	459	1069	1226	923	1823	1260.25
Shld1	ENSCGRG00001010212			SIGN	1.01	1	1.22	0.44	-1.53	0.01	63	69	52	61.33	68	70	42	78	64.5	55	84	75	80	73.5	30	38	28	47	35.75
SIRT4	ENSCGRG00001024733			SIGN	-1.27	1	1.15	0.87	-2.38	8.26e-05	60	52	48	53.33	63	26	39	27	38.75	51	66	52	39	52	20	15	19	13	16.75
Skil	ENSCGRG00001011528			SIGN	1.1	1	-1.32	0.00053	2.7	0	355	368	317	346.67	434	326	407	289	364	241	244	243	209	234.25	719	895	650	1282	886.5
Slc25a16	ENSCGRG00001008006			SIGN	1.02	1	-1.1	0.63	-1.56	9.97e-05	224	189	222	211.67	250	210	204	229	223.25	145	181	207	212	186.25	121	115	92	155	120.75
Slc25a44	ENSCGRG00001021651			SIGN	-1.21	0.26	-1.25	0.01	-2.06	0	297	266	232	265	254	219	188	204	216.25	205	193	190	189	194.25	111	104	95	105	103.75
Slc29a2	ENSCGRG00001018976			SIGN	-1.09	1	-1.31	0.00137	-1.97	0	308	310	225	281	284	277	202	250	253.25	194	211	200	181	196.5	132	98	112	119	115.25
Slc30a1	ENSCGRG00001025069			SIGN	1.21	0.13	-1.14	0.21	2.3	0	358	321	334	337.67	433	402	400	434	417.25	236	304	291	306	284.25	534	768	594	1111	751.75
Slc35c1	ENSCGRG00001019726			SIGN	-1.09	1	-1.31	8.52e-06	-1.6	0	1166	1171	998	1111.67	1129	1030	963	962	1021	787	786	763	846	795.5	591	502	586	619	574.5
Slc35f6	ENSCGRG00001024274			SIGN	-1.05	1	-1.03	1	-1.53	9.63e-09	443	474	323	413.33	449	444	309	318	380	399	343	358	332	358	241	204	203	269	229.25
Slc40a1	ENSCGRG00001014664			SIGN	-1.12	1	-1.03	1	-1.54	0.000103	159	146	123	142.67	136	131	125	129	130.25	117	130	133	151	132.75	75	76	72	76	74.75
Slc48a1	ENSCGRG00001012997			SIGN	-1.19	0.87	-1.17	0.35	-1.51	2.36e-06	316	239	214	256.33	284	217	163	167	207.75	171	196	232	182	195.25	168	114	127	137	136.5
Slc8b1	ENSCGRG00001013787			SIGN	-1.07	1	1.16	0.1	-2.44	0	399	359	329	362.33	397	312	292	347	337	337	438	420	378	393.25	140	106	113	188	136.75
Slc9a5	ENSCGRG00001000242			SIGN	1	1	-1.01	1	-2.74	0	219	197	152	189.33	222	171	157	206	189	155	186	201	152	173.5	61	48	57	73	59.75
Slc9a8	ENSCGRG00001022939			SIGN	-1.27	0.06	-1.42	4.13e-05	-1.54	8.28e-07	254	287	225	255.33	249	200	161	170	195	160	174	166	151	162.75	147	129	124	116	129
Smad7	ENSCGRG00001017713			SIGN	1.14	1	-1.13	0.89	6.49	0	79	44	59	60.67	81	66	65	45	64.25	42	52	53	37	46	309	344	296	343	323
Snapc4	ENSCGRG00001015109			SIGN	1.06	1	-1	1	-2.24	0	419	390	364	391	465	388	393	390	409	297	401	400	344	360.5	166	144	110	238	164.5
Snrnp35	ENSCGRG00001012630			SIGN	1.04	1	1.07	1	-1.97	3.1e-07	103	105	87	98.33	111	106	77	119	103.25	101	101	104	90	99	45	41	34	50	42.5
Snrpd2	ENSCGRG00001003078			SIGN	1.32	1	1.17	0.99	1.87	0.00019	34	37	22	31	50	34	46	40	42.5	33	22	41	45	35.25	42	54	43	39	44.5
Snx11	ENSCGRG00001022221			SIGN	1.12	1	1.06	0.97	1.99	1.19e-14	299	280	231	270	340	301	276	286	300.75	233	268	299	262	265.5	397	560	354	775	521.5
Socs3	ENSCGRG00001002299			SIGN	1.28	1	1.17	0.94	2.02	4.61e-06	38	33	30	33.67	49	44	38	44	43.75	33	43	33	40	37.25	54	62	48	80	61
Sox12	ENSCGRG00001007793			SIGN	1.17	1	-1.01	1	-1.54	7.02e-05	193	155	113	153.67	161	216	136	180	173.25	119	120	208	107	138.5	88	88	63	79	79.5
Sp1	ENSCGRG00001013852			SIGN	1.21	0.09	1.45	1.56e-08	1.56	8.82e-12	447	378	360	395	542	452	476	417	471.75	479	577	521	534	527.75	509	504	473	702	547
Spred3	ENSCGRG00001011612			SIGN	1.4	1	1.43	0.34	1.81	0.04	20	20	15	18.33	35	28	18	16	24.25	22	26	21	23	23	36	23	21	43	30.75
Sprtn	ENSCGRG00001007490			SIGN	-1.4	0.00288	-1.04	1	-1.95	1.51e-11	198	214	149	187	134	151	115	136	134	147	188	168	174	169.25	79	84	67	59	72.25
Srek1ip1	ENSCGRG00001018440			SIGN	1.15	1	1.24	0.31	1.54	0.00754	62	41	54	52.33	75	45	66	82	67	65	52	61	92	67.5	80	62	53	74	67.25
Srxn1	ENSCGRG00001020660			SIGN	1.01	1	-1.02	1	1.71	0	2838	2752	2168	2586	2939	2453	2459	2505	2589	2133	2642	2319	2318	2353	3375	4082	3217	5833	4126.75
St5	ENSCGRG00001022385			SIGN	-1.02	1	1.03	1	-1.53	6.61e-11	741	695	614	683.33	757	640	630	657	671	593	692	675	669	657.25	403	372	305	478	389.5
Stk11	ENSCGRG00001002947			SIGN	-1.05	1	-1.14	0.08	-1.58	0	1698	1686	1318	1567.33	1656	1579	1343	1357	1483.75	1252	1264	1265	1314	1273.75	853	743	796	1025	854.25
Stk11ip	ENSCGRG00001022049			SIGN	-1.04	1	1.03	1	-1.6	3.38e-10	434	412	326	390.67	421	391	312	341	366.25	354	385	390	345	368.5	228	187	172	294	220.25
Stk36	ENSCGRG00001021047			SIGN	1	1	1.24	0.08	-1.59	0.000716	139	114	110	121	133	121	110	108	118	123	138	161	124	136.5	58	66	59	93	69
Sugp2	ENSCGRG00001018264			SIGN	1	1	1.04	1	-2	2.29e-13	236	219	176	210.33	249	181	199	198	206.75	186	202	235	179	200.5	96	82	75	97	87.5
Supt4a	ENSCGRG00001018056			SIGN	-1.01	1	-1.03	1	-1.79	0	764	717	535	672	796	648	586	583	653.25	576	640	563	615	598.5	288	307	305	372	318
Suv39h1	ENSCGRG00001023557			SIGN	-1.13	0.6	-1.04	1	-1.7	0	852	830	692	791.33	776	766	580	714	709	654	718	752	772	724	384	362	375	407	382
Syngap1	ENSCGRG00001017977			SIGN	1.03	1	1.22	0.00366	-1.6	7.22e-13	666	670	538	624.67	769	642	543	569	630.75	647	693	779	676	698.75	344	275	321	410	337.5
Syvn1	ENSCGRG00001009803			SIGN	-1	1	1.04	1	-1.72	3.74e-12	361	355	294	336.67	388	331	298	303	330	321	304	352	305	320.5	177	140	154	186	164.25
Taf1d	ENSCGRG00001004962			SIGN	-1.35	0.000115	-1.27	0.000935	-3.01	0	502	492	546	513.33	364	429	332	468	398.25	317	424	432	417	397.5	146	142	124	113	131.25
Taok2	ENSCGRG00001019830			SIGN	1.01	1	1.08	0.5	-2.16	0	1351	1266	1004	1207	1386	1229	1070	1083	1192	1086	1272	1268	1132	1189.5	480	449	416	604	487.25
Tbc1d10c	ENSCGRG00001003830			SIGN	1.19	1	1.08	1	1.87	0.00144	27	24	33	28	39	27	38	29	33.25	24	25	34	31	28.5	31	55	41	75	50.5
Tbcc	ENSCGRG00001012387			SIGN	-1.16	1	-1.17	0.42	-1.66	1.83e-06	193	145	129	155.67	173	124	114	130	135.25	102	141	118	138	124.75	87	78	60	82	76.75
Tbx18	ENSCGRG00001020060			SIGN	1.36	0.28	1.37	0.05	4.14	0	72	73	65	70	115	88	92	71	91.5	62	112	89	83	86.5	212	263	224	473	293
Tbx2	ENSCGRG00001002926			SIGN	-1.1	1	-1.1	0.54	-1.98	0	342	295	268	301.67	322	327	207	239	273.75	240	270	230	277	254.25	139	110	119	145	128.25
Tent5a	ENSCGRG00001015453			SIGN	1.23	0.05	1.44	1.8e-08	3.27	0	442	471	335	416	592	438	524	470	506	455	611	598	572	559	1008	1205	1053	2135	1350.25
Tent5d	ENSCGRG00001012351			SIGN	1.16	1	1.11	1	1.67	0.00643	23	41	23	29	33	28	39	27	31.75	25	38	29	23	28.75	26	56	34	50	41.5
Tgif1	ENSCGRG00001007018			SIGN	1.16	0.69	1	1	-1.67	1.43e-08	238	210	221	223	298	240	247	225	252.5	201	202	223	188	203.5	118	102	102	146	117
Thbd	ENSCGRG00001010215			SIGN	-1.14	0.65	-1.08	0.62	-1.69	2.34e-14	550	559	437	515.33	485	472	435	399	447.75	449	403	448	462	440.5	262	217	255	291	256.25
Ticam1	ENSCGRG00001005336			SIGN	1.07	1	1.06	1	-2.87	0.000542	33	37	31	33.67	41	28	43	32	36	36	25	37	35	33.25	14	9	5	9	9.25
Timm9	ENSCGRG00001006577			SIGN	1.17	1	1.12	0.67	1.63	1.28e-06	97	105	107	103	107	111	142	138	124.5	92	122	118	120	113	127	141	137	143	137
Tlnrd1	ENSCGRG00001009930			SIGN	-1.02	1	-1.3	0.00182	-1.63	2.1e-09	345	316	238	299.67	343	298	239	258	284.5	224	221	196	191	208	151	142	148	165	151.5
Tlr6	ENSCGRG00001012094			SIGN	-1.41	1	-1.2	0.99	-4.96	1.62e-06	29	26	32	29	27	23	19	25	23.5	14	15	33	43	26.25	3	4	7	6	5
Tm7sf2	ENSCGRG00001013460			SIGN	-1.29	1	1.63	0.26	-2.8	0.02	23	13	13	16.33	18	17	1	14	12.5	19	33	24	21	24.25	3	2	9	7	5.25
Tmc8	ENSCGRG00001023341			SIGN	-1.06	1	-1.01	1	-1.69	6.27e-10	300	278	224	267.33	316	249	214	213	248	209	242	272	244	241.75	145	120	115	151	132.75
Tmem121	ENSCGRG00001016221			SIGN	-1.05	1	1.01	1	-1.62	0.00215	106	74	84	88	96	85	77	74	83	75	73	95	86	82.25	35	42	55	62	48.5
Tmem161a	ENSCGRG00001022808			SIGN	-1.02	1	-1.11	0.56	-1.6	8.08e-08	272	247	212	243.67	248	246	227	188	227.25	204	215	193	171	195.75	131	114	121	140	126.5
Tmem241	ENSCGRG00001015184			SIGN	-1.09	1	-1.18	0.24	2.4	0	147	159	129	145	159	127	117	141	136	113	117	112	125	116.75	291	303	242	360	299
Tmem51	ENSCGRG00001023938			SIGN	-1.12	1	-1.04	1	-1.9	1.19e-14	333	291	259	294.33	305	237	258	260	265	243	249	289	284	266.25	131	113	130	170	136
Tnfaip3	ENSCGRG00001019749			SIGN	1.14	0.36	-1.41	1.48e-08	1.86	0	980	948	825	917.67	1276	912	1083	834	1026.25	630	546	596	595	591.75	1428	1782	1000	2298	1627
Tnfrsf1a	ENSCGRG00001021062			SIGN	-1.03	1	1.05	0.97	-1.68	1.3e-13	527	529	411	489	535	469	435	448	471.75	455	497	477	476	476.25	274	198	230	305	251.75
Tnfrsf1b	ENSCGRG00001006800			SIGN	-1.13	1	-1.09	0.66	-2.13	0	293	245	218	252	265	227	190	183	216.25	220	218	194	196	207	101	84	100	117	100.5
Tnks1bp1	ENSCGRG00001016084			SIGN	-1.06	1	-1.2	0.00215	-1.84	0	3464	3553	2961	3326	3495	3079	2933	2984	3122.75	2614	2343	2767	2626	2587.5	1685	1295	1406	1677	1515.75
Tnpo2	ENSCGRG00001015917			SIGN	-1.06	1	-1.09	0.39	-1.73	0	1180	1130	907	1072.33	1153	1067	879	872	992.75	841	890	966	893	897.5	521	464	509	613	526.75
Top1mt	ENSCGRG00001013641			SIGN	1.04	1	1.1	0.46	-1.52	8.37e-08	383	376	305	354.67	420	349	341	345	363.75	339	388	362	360	362.25	199	188	176	233	199
Tor2a	ENSCGRG00001013283			SIGN	1.03	1	-1.04	1	-1.94	8.89e-14	264	234	229	242.33	284	262	219	242	251.75	203	226	216	233	219.5	115	88	99	132	108.5
Traf6	ENSCGRG00001019275			SIGN	1.11	1	1.05	1	1.84	0	307	313	291	303.67	406	301	343	336	346.5	245	303	319	364	307.75	461	510	382	775	532
Trib3	ENSCGRG00001011910			SIGN	-1.24	0.86	-1.22	0.33	-1.73	2.32e-05	107	101	97	101.67	89	84	83	65	80.25	62	95	68	82	76.75	51	46	45	49	47.75
Trim6	ENSCGRG00001004562			SIGN	-1.04	1	1.18	0.06	-1.62	1.31e-09	341	335	280	318.67	335	310	269	310	306	319	404	338	350	352.75	186	142	145	169	160.5
Trim72	ENSCGRG00001003643			SIGN	5.67	1	5.43	0.38	22.12	0.00456	1	0	0	0.33	4	1	2	2	2.25	0	5	2	1	2	5	8	12	15	10
Trmt1l	ENSCGRG00001019297			SIGN	1.2	0.06	1.45	2.54e-10	1.62	0	776	774	664	738	1008	830	863	855	889	821	1093	1049	1065	1007	1000	1042	848	1696	1146.5
Trmt44	ENSCGRG00001016915			SIGN	1.24	0.07	1.46	3.42e-07	1.61	5.27e-11	269	276	229	258	398	291	290	278	314.25	303	387	350	336	344	328	366	304	487	371.25
TRMT5	ENSCGRG00001018337			SIGN	-1.02	1	1.01	1	-1.71	1.21e-13	426	453	411	430	464	421	399	440	431	323	449	431	471	418.5	229	179	199	239	211.5
Trpt1	ENSCGRG00001008474			SIGN	1.11	1	-1.15	1	1.67	0.000626	46	50	34	43.33	51	42	49	59	50.25	34	32	43	39	37	55	62	57	90	66
Tsku	ENSCGRG00001012773			SIGN	-1.11	1	-1.43	0.000965	-1.88	2.29e-13	281	288	213	260.67	227	259	224	221	232.75	175	156	178	167	169	115	101	117	81	103.5
Tti1	ENSCGRG00001015015			SIGN	-1.06	1	1.05	0.9	-1.64	0	1427	1294	1000	1240.33	1291	1221	1020	1076	1152	1107	1303	1190	1200	1200	670	621	523	837	662.75
Ttll3	ENSCGRG00001000293			SIGN	-1.17	1	-1.13	0.87	-1.51	0.00991	80	68	67	71.67	64	65	52	67	62	54	72	54	62	60.5	37	35	43	50	41.25
Tut1	ENSCGRG00001017583			SIGN	-1.06	1	-1.05	1	-1.56	6.62e-12	671	703	582	652	657	622	558	615	613	524	620	619	563	581.5	355	337	312	436	360
Unk	ENSCGRG00001024874			SIGN	-1.03	1	1.11	0.41	-1.84	0	432	432	324	396	432	416	307	355	377.5	342	448	430	395	403.75	180	159	177	215	182.75
Urb2	ENSCGRG00001009591			SIGN	-1.06	1	-1.04	1	-1.54	1.19e-14	1644	1650	1355	1549.67	1620	1503	1351	1391	1466.25	1245	1436	1439	1477	1399.25	866	755	799	937	839.25
Urgcp	ENSCGRG00001010492			SIGN	-1.02	1	1.2	0.0069	-1.52	5.35e-12	1049	982	829	953.33	1022	947	801	886	914	1013	1146	1059	970	1047	563	459	493	617	533
Usp20	ENSCGRG00001007813			SIGN	-1.02	1	1.09	0.63	-1.6	7.46e-09	341	300	268	303	323	290	264	293	292.5	264	336	339	285	306	168	133	156	163	155
Vash1	ENSCGRG00001006114			SIGN	-1.07	1	-1.36	0.03	-1.59	0.000797	134	137	89	120	122	130	93	107	113	79	73	87	93	83	66	50	65	70	62.75
Vasn	ENSCGRG00001007380			SIGN	1.02	1	-1.07	0.57	-1.8	0	1290	1277	1019	1195.33	1334	1227	1181	1091	1208.25	962	968	1128	1054	1028	526	543	532	688	572.25
Vps18	ENSCGRG00001002363			SIGN	-1.09	1	-1	1	-2.36	0	682	688	569	646.33	674	606	527	537	586	584	584	614	591	593.25	232	236	192	325	246.25
Wdcp	ENSCGRG00001019012			SIGN	1.26	0.02	1.28	0.000835	-1.88	0	375	361	310	348.67	504	418	411	485	454.5	387	480	375	494	434	173	138	137	261	177.25
Wdr24	ENSCGRG00001014963			SIGN	-1.03	1	-1.05	1	-1.75	1.19e-14	481	456	371	436	471	412	390	454	431.75	395	419	347	430	397.75	218	200	180	224	205.5
Wdr6	ENSCGRG00001020890			SIGN	-1.22	0.00581	-1.16	0.02	-1.81	0	2179	2320	1874	2124.33	1834	1971	1438	1707	1737.5	1721	1604	1792	1706	1705.75	1024	847	954	1005	957.5
Wdr81	ENSCGRG00001001781			SIGN	-1.03	1	-1.05	0.85	-2.65	0	3024	3032	2277	2777.67	3166	2749	2286	2347	2637	2448	2328	2492	2370	2409.5	968	785	766	984	875.75
Wfs1	ENSCGRG00001022731			SIGN	1.02	1	-1.16	0.08	-1.65	1.11e-12	526	503	425	484.67	560	479	458	483	495	393	364	405	392	388.5	282	197	232	241	238
Xkr8	ENSCGRG00001017118			SIGN	1.09	1	-1.02	1	-1.96	1.54e-08	134	132	103	123	141	141	124	134	135	105	102	132	116	113.75	61	42	48	79	57.5
Xpnpep3	ENSCGRG00001020209			SIGN	1.1	1	1.14	0.15	1.88	0	488	465	348	433.67	542	453	449	458	475.5	390	541	444	471	461.5	594	695	675	1070	758.5
Xylt2	ENSCGRG00001021636			SIGN	-1.14	0.54	-1.3	0.00014	-1.7	0	657	677	530	621.33	632	546	503	522	550.75	457	405	438	515	453.75	329	258	295	319	300.25
Zan	ENSCGRG00001000780			SIGN	-1.18	1	-1.16	1	-1.97	0.03	32	35	20	29	18	25	32	22	24.25	28	21	20	23	23	10	13	12	13	12
Zbtb1	ENSCGRG00001019973			SIGN	1.38	8.6e-07	1.25	0.000835	1.54	1.61e-13	695	747	596	679.33	1091	782	1016	832	930.25	685	835	802	827	787.25	835	900	789	1151	918.75
Zbtb11	ENSCGRG00001022421			SIGN	1.36	1.43e-05	1.38	5.33e-07	1.51	2.89e-11	510	579	466	518.33	777	641	745	645	702	556	683	730	709	669.5	653	744	503	1066	741.5
Zbtb45	ENSCGRG00001015644			SIGN	-1.09	1	1.33	0.05	-2.24	2.85e-09	110	109	74	97.67	118	97	69	67	87.75	103	126	115	130	118.5	43	36	25	56	40
Zbtb48	ENSCGRG00001002481			SIGN	1.12	0.89	1.07	0.82	-1.95	0	441	413	363	405.67	507	448	407	423	446.25	340	458	428	362	397	185	161	156	237	184.75
Zbtb7a	ENSCGRG00001019218			SIGN	1.09	1	1.04	1	-1.51	6.82e-11	778	825	675	759.33	858	884	828	666	809	683	753	699	734	717.25	447	387	377	456	416.75
Zc3h12a	ENSCGRG00001015497			SIGN	-1.08	1	-1.28	0.14	1.79	2.17e-07	117	109	103	109.67	104	108	93	93	99.5	88	63	91	72	78.5	137	191	145	211	171
Zc3h3	ENSCGRG00001016268			SIGN	-1.03	1	1.04	1	-1.7	0	608	574	467	549.67	542	568	474	475	514.75	490	640	483	455	517	273	252	252	305	270.5
Zfp169	ENSCGRG00001010605			SIGN	1.26	0.56	1.18	0.42	-1.98	4.65e-06	87	80	66	77.67	105	96	89	81	92.75	76	97	88	64	81.25	31	36	27	52	36.5
Zfp212	ENSCGRG00001012994			SIGN	-1.07	1	-1.01	1	-1.7	1.4e-13	493	484	362	446.33	481	442	350	382	413.75	371	407	443	414	408.75	233	173	226	216	212
Zfp239	ENSCGRG00001007344			SIGN	-1.05	1	-1.01	1	-1.79	0.00297	65	42	53	53.33	55	48	40	64	51.75	60	55	41	44	50	22	27	23	32	26
Zfp266	ENSCGRG00001013855			SIGN	1.1	1	1.09	0.6	1.61	1.02e-12	356	366	294	338.67	399	336	418	337	372.5	337	335	328	385	346.25	444	457	413	535	462.25
Zfp296	ENSCGRG00001015680			SIGN	-1.13	1	-1.37	0.46	-1.86	0.02	37	49	33	39.67	28	42	33	40	35.75	33	19	32	27	27.75	19	19	13	13	16
Zfp324	ENSCGRG00001014364			SIGN	-1.2	1	-1.15	1	-2.87	3.66e-05	43	45	41	43	40	40	33	26	34.75	24	41	35	37	34.25	11	13	12	11	11.75
Zfp354c	ENSCGRG00001011620			SIGN	1.29	0.78	1.2	0.54	1.55	0.00155	50	66	55	57	65	69	89	87	77.5	60	67	65	81	68.25	66	70	77	74	71.75
Zfp367	ENSCGRG00001022531			SIGN	1.29	0.04	1.23	0.04	1.65	3.05e-10	196	204	163	187.67	247	209	259	234	237.25	184	224	257	189	213.5	243	294	206	338	270.25
Zfp386	ENSCGRG00001017208			SIGN	-1.08	1	1.12	0.5	-1.85	1.93e-10	203	187	194	194.67	184	181	166	190	180.25	153	237	235	200	206.25	93	79	83	124	94.75
Zfp414	ENSCGRG00001019364			SIGN	-1.31	0.26	-1.27	0.11	-1.73	1.46e-05	144	176	124	148	132	112	95	110	112.25	105	104	117	110	109	83	70	52	86	72.75
Zfp472	ENSCGRG00001015528			SIGN	-1.1	1	-1.03	1	-1.72	1.73e-08	206	211	168	195	184	171	190	181	181.5	161	163	196	211	182.75	89	93	91	112	96.25
Zfp512b	ENSCGRG00001001965			SIGN	-1.44	6.28e-07	-1.32	0.000109	-1.7	4.6e-14	536	485	426	482.33	324	387	287	358	339	325	350	357	355	346.75	243	203	239	237	230.5
Zfp551	ENSCGRG00001000507			SIGN	-1.07	1	1.11	0.99	-2.94	3.73e-09	71	80	56	69	55	85	54	50	61	70	72	70	59	67.75	27	14	15	15	17.75
Zfp558	ENSCGRG00001013016			SIGN	1.09	1	1.3	0.24	1.57	0.00599	51	52	44	49	65	45	49	48	51.75	50	67	63	50	57.5	63	71	51	71	64
Zfp560	ENSCGRG00001023858			SIGN	1.23	0.54	1.15	0.45	1.7	7.82e-08	97	110	98	101.67	132	120	132	128	128	106	105	114	126	112.75	138	138	141	164	145.25
Zfp574	ENSCGRG00001001429			SIGN	1.09	1	1.02	1	-1.63	6.04e-08	246	238	196	226.67	267	246	217	255	246.25	210	238	208	203	214.75	118	111	105	143	119.25
Zfp608	ENSCGRG00001015219			SIGN	-1.34	0.00197	1.02	1	-1.77	9.55e-13	341	321	276	312.67	254	241	207	228	232.5	321	289	280	296	296.5	159	124	142	200	156.25
Zfp629	ENSCGRG00001018142			SIGN	-1.04	1	-1.01	1	-1.96	0	315	353	271	313	349	279	284	309	305.25	261	305	296	308	292.5	155	115	114	161	136.25
Zfp651	ENSCGRG00001022459			SIGN	1.1	1	1.23	0.07	-1.68	4.78e-05	143	156	126	141.67	177	169	128	126	150	140	196	145	147	157	66	59	78	92	73.75
Zfp654	ENSCGRG00001020292			SIGN	1.23	0.09	1.28	0.00192	2.17	0	281	323	277	293.67	406	345	350	318	354.75	291	385	366	346	347	514	502	521	605	535.5
Zfp672	ENSCGRG00001004468			SIGN	1.08	1	1.05	1	-1.62	0.0052	59	62	56	59	68	60	66	57	62.75	42	76	56	56	57.5	26	25	37	45	33.25
Zfp688	ENSCGRG00001008599			SIGN	-1.2	0.98	-1.15	0.57	-1.57	0.00061	113	96	89	99.33	90	72	86	87	83.75	78	85	82	82	81.75	59	51	42	56	52
Zfp703	ENSCGRG00001015865			SIGN	-1.11	1	-1.1	0.42	-1.63	7.79e-12	452	499	407	452.67	408	470	361	409	412	326	414	400	420	390	248	184	239	191	215.5
Zfp715	ENSCGRG00001011966			SIGN	1.25	0.05	1.29	0.00134	2.06	0	294	283	244	273.67	432	268	353	324	344.25	276	339	365	347	331.75	477	500	380	694	512.75
Zfp772	ENSCGRG00001020685			SIGN	1.06	1	-1.08	1	-2.28	0.00325	44	29	32	35	42	41	26	43	38	24	34	35	32	31.25	11	12	14	17	13.5
Zfp784	ENSCGRG00001013279			SIGN	1.04	1	1.17	1	-2.09	0.02	30	23	18	23.67	27	28	16	25	24	30	24	25	21	25	14	7	6	2	7.25
Zfp790	ENSCGRG00001014145			SIGN	1.2	0.86	-1.01	1	1.59	2.06e-05	89	105	76	90	114	114	106	94	107	81	79	82	87	82.25	116	118	109	142	121.25
Zfp800	ENSCGRG00001012282			SIGN	1.24	0.42	1.14	0.5	1.56	3.65e-09	217	283	207	235.67	322	262	319	274	294.25	218	232	285	286	255.25	276	312	296	347	307.75
Zfp809	ENSCGRG00001001284			SIGN	-1.16	1	1.11	0.84	-2.07	1.12e-08	165	142	122	143	143	146	91	119	124.75	109	158	169	161	149.25	68	36	63	69	59
Zfp84	ENSCGRG00001001881			SIGN	1.06	1	1.16	0.96	2.12	7.72e-07	39	38	44	40.33	51	29	48	41	42.25	38	49	46	41	43.5	65	80	61	124	82.5
Zfp865	ENSCGRG00001013598			SIGN	-1.26	1	-1.29	0.3	-1.65	0.00644	74	68	44	62	42	56	47	48	48.25	52	41	44	39	44	25	29	36	37	31.75
Zfp866	ENSCGRG00001019443			SIGN	1.22	0.48	1.34	0.0045	-1.69	8.04e-06	136	124	114	124.67	173	142	147	157	154.75	138	148	183	169	159.5	62	62	54	68	61.5
Zfp870	ENSCGRG00001019689			SIGN	1.03	1	1.04	1	-1.8	0.04	44	34	28	35.33	37	39	28	47	37.75	31	32	45	35	35.75	15	15	17	32	19.75
Zfp956	ENSCGRG00001014461			SIGN	-1.01	1	-1.07	1	-2.31	9.1e-05	65	58	48	57	56	63	51	47	54.25	43	57	49	43	48	24	21	14	20	19.75
Zkscan14	ENSCGRG00001014948			SIGN	1.05	1	-1.1	1	3.02	0	68	89	69	75.33	87	66	82	75	77.5	60	66	70	57	63.25	175	211	161	266	203.25
Zkscan6	ENSCGRG00001019508			SIGN	-1.05	1	-1	1	-1.85	0.000582	68	64	58	63.33	54	69	56	69	62	60	50	70	64	61	29	33	20	48	32.5
Zscan2	ENSCGRG00001008496			SIGN	1.27	1	1.35	0.63	-3.04	0.02	16	12	11	13	10	20	20	15	16.25	15	15	20	15	16.25	3	6	1	7	4.25
Zscan20	ENSCGRG00001013788			SIGN	1.04	1	-1.01	1	-1.55	3.81e-06	210	221	192	207.67	246	205	208	200	214.75	197	183	190	197	191.75	121	102	101	138	115.5
Zswim3	ENSCGRG00001015683			SIGN	1.25	0.05	1.34	0.000117	-1.95	0	284	292	247	274.33	388	326	317	341	343	281	401	358	344	346	123	114	102	112	112.75
Lcmt2	ENSCGRG00001009861	SIGN	SIGN		-2.3	0.000139	-1.58	0.04	-1.47	0.02	69	67	60	65.33	26	35	21	34	29	34	37	48	40	39.75	40	35	32	37	36
March7	ENSCGRG00001024547	SIGN	SIGN		-1.66	2.68e-09	-1.57	3.82e-08	-1.14	0.08	1306	1105	1267	1226	723	865	660	847	773.75	708	662	802	913	771.25	870	787	949	835	860.25
1600002K03Rik	ENSCGRG00001002716		SIGN		1.25	0.97	1.56	0.00191	1.3	0.16	83	70	42	65	85	87	69	81	80.5	72	113	100	92	94.25	59	74	70	92	73.75
4430402I18Rik	ENSCGRG00001002881		SIGN		1.07	1	2	0.00885	1.12	1	17	25	20	20.67	17	21	26	26	22.5	29	56	35	40	40	13	23	20	26	20.5
Aen	ENSCGRG00001021559		SIGN		-1.23	0.00844	-1.9	0	-1.27	0.000204	992	1042	967	1000.33	870	808	798	694	792.5	451	507	502	471	482.75	615	682	605	678	645
Ahi1	ENSCGRG00001019676		SIGN		1.13	0.81	1.69	0	1.27	0.00134	416	379	326	373.67	486	385	401	414	421.5	513	648	606	590	589.25	397	380	370	516	415.75
Ahrr	ENSCGRG00001007683		SIGN		1.14	0.6	1.64	0	1.16	0.09	496	517	414	475.67	615	539	502	486	535.5	572	839	755	728	723.5	430	458	439	653	495
Ahsa2	ENSCGRG00001004669		SIGN		1.32	0.01	1.76	4.5e-13	1.31	9.82e-06	1034	968	887	963	1475	1018	1348	1230	1267.75	1193	1970	1636	1553	1588	1031	1029	975	1531	1141.5
Akap3	ENSCGRG00001015006		SIGN		-1.62	0.6	-1.87	0.04	-1.32	0.66	41	20	37	32.67	26	16	17	31	22.5	15	17	19	22	18.25	16	26	17	40	24.75
Akap7	ENSCGRG00001014402		SIGN		-1.26	0.55	-1.78	1.42e-06	-1.13	0.56	136	141	144	140.33	133	112	101	130	119	79	63	69	106	79.25	102	99	100	133	108.5
Aldh18a1	ENSCGRG00001020622		SIGN		1.57	1	2.05	0.04	1.6	0.31	9	10	8	9	20	10	12	16	14.5	14	25	13	19	17.75	8	14	13	18	13.25
Alg5	ENSCGRG00001018711		SIGN		-1.14	0.59	-1.56	1.71e-11	1.02	1	524	501	473	499.33	489	438	404	447	444.5	288	289	306	336	304.75	420	378	428	488	428.5
Amh	ENSCGRG00001011164		SIGN		1.32	1	1.71	0.02	-1.17	0.93	62	26	34	40.67	66	51	38	43	49.5	47	90	63	40	60	34	24	26	37	30.25
Ankrd1	ENSCGRG00001019357		SIGN		-1.21	0.06	-1.8	0	1.01	1	748	589	532	623	552	517	485	445	499.75	335	300	326	295	314	541	487	481	436	486.25
Ankrd13d	ENSCGRG00001015858		SIGN		1.66	1	2.87	0.00301	1.15	1	11	8	3	7.33	16	3	16	15	12.5	16	19	27	19	20.25	10	6	4	17	9.25
Aoc2	ENSCGRG00001018276		SIGN		1.75	0.55	2.36	0.00342	1.5	0.36	14	22	8	14.67	30	22	23	28	25.75	20	42	38	31	32.75	19	13	21	23	19
Ap5b1	ENSCGRG00001010726		SIGN		-1.26	0.00581	-1.56	6.02e-13	-1.49	5.08e-10	765	751	579	698.33	601	585	519	447	538	386	404	430	398	404.5	416	375	332	554	419.25
Apba1	ENSCGRG00001017033		SIGN		-1.23	1	-1.59	0.00213	1.04	1	82	89	84	85	77	59	69	74	69.75	56	54	43	50	50.75	74	64	77	77	73
Aptx	ENSCGRG00001000705		SIGN		-1.24	0.73	-1.57	0.000437	-1.11	0.68	117	138	128	127.67	111	116	87	106	105	83	63	78	88	78	95	87	95	121	99.5
Arhgap25	ENSCGRG00001014196		SIGN		1.04	1	-1.96	0	1.16	0.07	738	573	664	658.33	926	555	581	658	680	253	301	406	280	310	715	524	606	707	638
Arhgef25	ENSCGRG00001022612		SIGN		2.83	0.85	4.85	0.02	1.02	1	2	3	0	1.67	10	2	2	4	4.5	9	7	8	4	7	0	2	2	4	2
Arl4d	ENSCGRG00001011460		SIGN		1.16	1	1.59	7.92e-07	1	1	112	121	113	115.33	155	122	123	145	136.25	142	173	206	182	175.75	121	75	85	98	94.75
Arntl2	ENSCGRG00001003351		SIGN		-1.05	1	-1.94	0.04	1.02	1	17	28	19	21.33	23	21	16	27	21.75	10	9	13	12	11	16	20	16	17	17.25
Arvcf	ENSCGRG00001008113		SIGN		1.07	1	1.5	1.42e-05	-1.02	1	164	118	101	127.67	157	122	134	113	131.5	164	187	182	153	171.5	113	82	108	122	106.25
Atf4	ENSCGRG00001018678		SIGN		-1.18	0.52	-1.65	1.25e-10	1.02	1	2639	2369	2649	2552.33	2745	1577	2565	1861	2187	1278	1451	1424	1616	1442.25	2061	2088	2112	2930	2297.75
Atp2b4	ENSCGRG00001011759		SIGN		-1.12	1	-1.53	3.4e-06	-1.03	1	513	480	426	473	492	407	439	310	412	346	189	293	298	281.5	408	348	354	380	372.5
Atp6v1g2	ENSCGRG00001015820		SIGN		1.03	1	-2.45	0.00209	-1.14	1	24	30	23	25.67	26	25	25	24	25	10	9	14	4	9.25	19	22	13	24	19.5
Banp	ENSCGRG00001012363		SIGN		1.47	0.000125	1.52	2.09e-06	1.02	1	521	477	339	445.67	860	520	629	514	630.75	546	719	580	563	602	398	372	320	635	431.25
Bcl2l11	ENSCGRG00001017910		SIGN		1.33	0.01	1.51	4.77e-07	1.5	1.7e-06	189	191	164	181.33	248	227	271	212	239.5	222	266	260	273	255.25	185	227	244	282	234.5
Birc3	ENSCGRG00001008505		SIGN		-1.09	1	-1.58	2.6e-13	-1.47	6.15e-09	716	657	532	635	647	581	554	602	596	380	315	405	441	385.25	429	299	314	312	338.5
Capn8	ENSCGRG00001010502		SIGN		-1.15	1	-3.11	2.45e-05	-1.3	0.65	34	44	20	32.67	28	31	23	26	27	13	9	10	5	9.25	21	15	24	22	20.5
Castor2	ENSCGRG00001003009		SIGN		1.11	1	1.51	0.03	-1.11	1	47	35	34	38.67	41	43	43	45	43	60	49	57	52	54.5	25	30	29	45	32.25
Ccdc154	ENSCGRG00001021301		SIGN		4.58	0.14	7.04	0.00104	2.64	0.29	2	1	2	1.67	7	10	4	11	8	6	22	10	9	11.75	7	3	1	2	3.25
Ccdc17	ENSCGRG00001015801		SIGN		-1.89	0.45	-2.25	0.03	-1.39	0.62	16	18	10	14.67	9	8	6	10	8.25	4	7	7	8	6.5	9	10	6	16	10.25
Ccdc171	ENSCGRG00001012100		SIGN		1.03	1	1.82	0.05	1.24	0.94	13	9	16	12.67	14	13	11	10	12	26	18	22	13	19.75	11	16	11	13	12.75
Ccdc173	ENSCGRG00001021032		SIGN		1.13	1	1.61	0.00262	1.42	0.05	79	58	72	69.67	104	73	71	69	79.25	67	125	115	119	106.5	78	96	65	129	92
Ccdc66	ENSCGRG00001013272		SIGN		1.08	1	1.53	2.23e-06	-1.25	0.1	152	149	110	137	181	133	146	139	149.75	172	192	206	224	198.5	103	82	79	137	100.25
Ccdc74a	ENSCGRG00001016250		SIGN		-1.2	1	-3.14	0.04	-1.32	0.94	5	9	9	7.67	4	8	9	7	7	2	3	0	5	2.5	3	6	5	10	6
Ccl2	ENSCGRG00001010610		SIGN		-1.1	1	-2.97	0	-1.05	0.87	3809	3498	3438	3581.67	3343	3102	3903	3302	3412.5	1286	689	1305	1591	1217.75	2834	2468	2998	3538	2959.5
Ccl7	ENSCGRG00001016678		SIGN		-1.16	1	-2.95	5.68e-11	-1.08	1	69	72	66	69	63	62	59	54	59.5	25	15	21	27	22	51	43	61	59	53.5
Ccn1	ENSCGRG00001017662		SIGN		-1.27	0.00136	-1.6	0	-1.34	6.2e-06	938	879	759	858.67	749	719	604	673	686.25	494	486	485	577	510.5	463	555	532	766	579
Cenpb	ENSCGRG00001019077		SIGN		-1.24	0.02	-1.73	0	-1.4	2.18e-06	568	550	439	519	451	434	366	408	414.75	308	234	298	274	278.5	325	249	322	329	306.25
Cilp2	ENSCGRG00001007338		SIGN		1.76	0.53	2.18	0.01	1.67	0.12	22	19	10	17	39	33	17	19	27	18	52	35	20	31.25	23	26	19	29	24.25
Clmp	ENSCGRG00001019855		SIGN		-1.3	1	-1.71	0.02	-1.41	0.12	66	49	50	55	44	48	44	38	43.5	27	28	27	42	31	32	36	26	46	35
Col24a1	ENSCGRG00001021909		SIGN		2.35	1	4.69	0.05	2.06	0.77	0	3	1	1.33	4	4	4	1	3.25	6	3	8	8	6.25	4	0	3	4	2.75
Cradd	ENSCGRG00001005469		SIGN		-1.03	1	-1.51	2.01e-05	-1.23	0.09	190	156	163	169.67	188	157	159	194	174.5	93	106	110	140	112.25	124	99	111	138	118
Cst6	ENSCGRG00001021274		SIGN		-1.5	1	-2.78	0.04	-2.55	0.09	12	8	9	9.67	5	7	8	6	6.5	3	2	4	4	3.25	2	3	4	4	3.25
Cuedc1	ENSCGRG00001006560		SIGN		-1.06	1	-1.66	0.000437	-1.14	0.72	104	92	76	90.67	91	94	85	73	85.75	56	43	40	66	51.25	60	57	75	64	64
Cxcl10	ENSCGRG00001000274		SIGN		-1.65	1	-2.74	0.03	1.01	1	19	8	10	12.33	5	6	11	7	7.25	6	2	5	3	4	13	8	9	6	9
Cxcl12	ENSCGRG00001018723		SIGN		-1.04	1	1.69	0.00217	-1.34	0.25	57	65	27	49.67	63	41	38	41	45.75	71	73	90	64	74.5	32	32	24	48	34
Cyp27b1	ENSCGRG00001021985		SIGN		1.56	1	1.99	0.03	-1.04	1	14	14	7	11.67	18	15	19	13	16.25	12	29	28	9	19.5	7	8	12	23	12.5
Dbp	ENSCGRG00001022543		SIGN		1.27	1	1.78	0.000437	1.16	0.79	31	49	47	42.33	46	63	45	72	56.5	71	75	75	78	74.75	41	38	40	46	41.25
Ddx50	ENSCGRG00001020223		SIGN		1.16	0.24	1.61	0	1.22	0.00271	937	849	803	863	1081	894	1013	1064	1013	1048	1527	1382	1353	1327.5	847	844	849	1197	934.25
Dhx9	ENSCGRG00001015796		SIGN		-1.09	1	-1.75	0	1.02	1	8779	8750	7961	8496.67	8578	7796	7796	7522	7923	4322	4230	4659	5277	4622	7003	6844	7167	8707	7430.25
Dnah10	ENSCGRG00001004884		SIGN		2.52	1	8.81	0.02	2.7	0.65	2	0	0	0.67	2	2	2	0	1.5	2	10	7	2	5.25	2	0	3	5	2.5
Dnajb3	ENSCGRG00001009691		SIGN		-1.78	0.29	-2.98	0.000198	-1.64	0.15	19	22	24	21.67	11	13	11	20	13.75	10	4	8	9	7.75	9	10	13	12	11
Dnajc30	ENSCGRG00001009358		SIGN		-1.63	0.46	-2.12	0.00593	-1.21	0.92	25	24	25	24.67	14	16	14	16	15	14	11	9	9	10.75	19	16	14	17	16.5
Dnase1l2	ENSCGRG00001011126		SIGN		1.68	0.55	2.3	0.0019	-1.11	1	30	13	17	20	43	31	33	28	33.75	26	52	45	50	43.25	11	21	11	35	19.5
Dok3	ENSCGRG00001009102		SIGN		1.55	0.78	2.51	0.000144	1.06	1	20	18	19	19	31	27	26	33	29.25	35	60	44	40	44.75	14	16	19	43	23
Dph6	ENSCGRG00001022722		SIGN		-1.14	0.71	-1.73	0	-1.17	0.09	446	409	385	413.33	405	361	337	335	359.5	216	209	238	227	222.5	292	271	291	372	306.5
Dqx1	ENSCGRG00001011093		SIGN		1.28	0.98	2.02	1.8e-06	1.3	0.04	97	93	94	94.67	137	103	108	111	114.75	115	274	190	127	176.5	108	90	101	155	113.5
Dusp15	ENSCGRG00001024483		SIGN		-1.08	1	-1.5	2.2e-07	-1.14	0.28	321	300	269	296.67	307	275	255	229	266.5	182	204	156	174	179	231	188	211	263	223.25
E2f5	ENSCGRG00001020704		SIGN		1.54	0.09	1.7	0.00153	1.03	1	49	34	36	39.67	74	52	64	53	60.75	55	71	57	66	62.25	35	41	22	40	34.5
Egr3	ENSCGRG00001009879		SIGN		-1.06	1	-2.82	0	1.31	0.00481	191	183	139	171	174	156	177	114	155.25	50	44	61	62	54.25	176	190	173	297	209
Eif4a2	ENSCGRG00001022442		SIGN		1.25	0.00029	1.68	0	-1.04	0.96	3709	3436	3021	3388.67	4717	3915	4210	4123	4241.25	4228	6169	5572	5370	5334.75	2767	2513	2589	3360	2807.25
Elac1	ENSCGRG00001008766		SIGN		1.01	1	-1.92	0.05	-1.07	1	16	27	29	24	30	26	18	26	25	6	15	13	15	12.25	19	21	14	15	17.25
Etv5	ENSCGRG00001021130		SIGN		-1.07	1	-2.06	0	-1.01	1	311	285	254	283.33	288	272	251	244	263.75	124	113	139	135	127.75	233	201	243	249	231.5
Evc2	ENSCGRG00001015737		SIGN		-1.21	0.14	-1.54	1.05e-09	-1.02	1	488	377	359	408	381	369	291	317	339.5	216	245	259	275	248.75	349	335	275	377	334
Fam129c	ENSCGRG00001000261		SIGN		2.21	0.35	2.43	0.03	1.41	0.79	5	9	4	6	19	11	13	7	12.5	11	19	8	13	12.75	7	10	3	11	7.75
Fam228b	ENSCGRG00001002148		SIGN		1.01	1	1.68	0.03	1.32	0.47	39	27	23	29.67	30	34	29	34	31.75	33	50	54	63	50	31	31	32	47	35.25
Fbf1	ENSCGRG00001020602		SIGN		1.15	0.41	1.75	0	-1.13	0.19	651	618	546	605	790	681	598	685	688.5	768	1201	1066	920	988.75	440	429	423	625	479.25
Fbxo32	ENSCGRG00001006713		SIGN		-1.32	0.77	-1.51	0.02	-1.34	0.02	112	136	105	117.67	105	111	69	71	89	85	47	73	81	71.5	69	65	77	62	68.25
Fbxo47	ENSCGRG00001019187		SIGN		1.07	1	1.84	5.15e-07	1.27	0.22	59	66	45	56.67	62	62	54	58	59	77	124	94	88	95.75	57	63	52	78	62.5
Fcer2a	ENSCGRG00001000249		SIGN		-1.06	1	-1.65	0.00017	-1.08	1	120	103	114	112.33	111	113	110	92	106.5	64	50	64	80	64.5	102	65	86	97	87.5
Fndc10	ENSCGRG00001012937		SIGN		-1.74	0.87	-4.07	0.000876	-2.81	0.06	15	28	4	15.67	9	11	6	12	9.5	2	3	6	4	3.75	1	4	7	4	4
Fry	ENSCGRG00001011470		SIGN		-1.01	1	-1.51	3.74e-10	-1.07	0.74	565	554	465	528	636	500	498	431	516.25	350	265	320	351	321.5	455	424	315	471	416.25
Fubp1	ENSCGRG00001007103		SIGN		1.32	7.78e-06	1.66	0	1.04	0.96	1294	1152	933	1126.33	1777	1421	1352	1319	1467.25	1631	1809	1706	1714	1715	1055	933	833	1166	996.75
Garnl3	ENSCGRG00001015517		SIGN		-1.28	1	-1.97	0.02	-1.06	1	35	23	28	28.67	20	28	20	18	21.5	13	18	9	12	13	20	31	14	26	22.75
gene:ENSCGRG00001001153	ENSCGRG00001001153		SIGN		1.18	1	1.69	6.99e-07	1.3	0.02	139	139	132	136.67	164	155	162	175	164	156	278	223	233	222.5	151	146	130	176	150.75
gene:ENSCGRG00001002410	ENSCGRG00001002410		SIGN		-1.27	1	-2.27	0.04	1.08	1	13	11	15	13	10	8	12	12	10.5	7	4	6	5	5.5	12	14	8	7	10.25
gene:ENSCGRG00001010756	ENSCGRG00001010756		SIGN		-1.22	0.00632	-1.8	0	-1.38	6.15e-09	2601	2426	2260	2429	2081	1885	1971	2164	2025.25	1363	1111	1363	1304	1285.25	1650	1257	1371	1356	1408.5
gene:ENSCGRG00001015776	ENSCGRG00001015776		SIGN		1.28	0.68	1.66	0.000104	-1.04	1	85	80	60	75	94	98	86	93	92.75	110	130	117	94	112.75	63	56	55	76	62.5
gene:ENSCGRG00001016131	ENSCGRG00001016131		SIGN		-1.2	0.67	-1.85	5.8e-10	-1.09	0.79	172	151	137	153.33	145	125	124	134	132	75	75	75	96	80.25	123	103	113	105	111
gene:ENSCGRG00001017420	ENSCGRG00001017420		SIGN		-1.01	1	-1.7	4.65e-05	1.2	0.28	92	84	84	86.67	97	88	79	78	85.5	49	38	52	51	47.5	84	80	88	86	84.5
gene:ENSCGRG00001018378	ENSCGRG00001018378		SIGN		1.39	0.06	1.72	5.19e-07	1.2	0.19	127	134	100	120.33	199	143	151	165	164.5	166	232	191	177	191.5	122	108	118	165	128.25
gene:ENSCGRG00001019229	ENSCGRG00001019229		SIGN		1.15	0.23	1.54	0	1.22	0.00116	1241	1305	1105	1217	1468	1367	1424	1399	1414.5	1445	1991	1784	1878	1774.5	1163	1202	1231	1518	1278.5
gene:ENSCGRG00001022412	ENSCGRG00001022412		SIGN		-1.02	1	-1.84	0.03	1.09	1	25	31	24	26.67	28	26	22	30	26.5	16	15	12	12	13.75	26	24	20	24	23.5
gene:ENSCGRG00001022733	ENSCGRG00001022733		SIGN		1.21	1	1.63	0.000156	1.41	0.02	99	76	60	78.33	115	97	73	101	96.5	103	127	125	129	121	80	94	92	108	93.5
gene:ENSCGRG00001024624	ENSCGRG00001024624		SIGN		2.89	0.6	4.81	0.00593	-1.19	1	1	2	3	2	7	4	6	5	5.5	6	12	12	5	8.75	0	3	1	2	1.5
Gm1110	ENSCGRG00001020876		SIGN		-1.32	1	-2.98	0.000235	-1.37	0.54	28	26	20	24.67	17	18	18	29	20.5	9	9	8	8	8.5	17	14	12	17	15
Gnb1l	ENSCGRG00001011168		SIGN		1.24	0.36	1.58	5.52e-07	-1.19	0.28	149	121	103	124.33	191	131	138	127	146.75	187	201	162	146	174	92	86	73	101	88
Gnb3	ENSCGRG00001016439		SIGN		1.27	1	1.93	0.02	-2.08	0.05	26	21	13	20	26	26	23	24	24.75	27	49	33	32	35.25	10	2	11	13	9
Gprasp1	ENSCGRG00001008886		SIGN		1.47	0.000241	1.91	0	1.38	9.11e-06	357	362	297	338.67	582	399	516	455	488	469	761	603	559	598	396	387	341	640	441
Grin2d	ENSCGRG00001004821		SIGN		-1.11	1	-1.76	7.22e-14	-1.1	0.56	337	297	282	305.33	304	287	260	242	273.25	124	156	185	183	162	243	226	202	257	232
Hdac9	ENSCGRG00001012600		SIGN		1.2	1	2.92	8.08e-05	1.07	1	11	13	15	13	13	24	6	21	16	32	42	37	36	36.75	11	8	15	13	11.75
Herc3	ENSCGRG00001010680		SIGN		-1.07	1	-2.06	2.29e-09	1	1	145	133	138	138.67	146	146	107	107	126.5	58	60	64	64	61.5	119	108	109	120	114
Hexim2	ENSCGRG00001014831		SIGN		-1.16	1	1.5	0.00779	-1.32	0.16	62	66	52	60	71	42	40	58	52.75	69	94	91	91	86.25	37	37	35	37	36.5
Hnrnpdl	ENSCGRG00001010960		SIGN		-1.27	0.000154	-2.63	0	-1.2	0.00172	3342	3446	2864	3217.33	2691	2651	2468	2582	2598	1173	1007	1156	1378	1178.5	2289	1967	2191	2452	2224.75
Hps1	ENSCGRG00001017475		SIGN		-1.21	0.47	-1.98	7.22e-14	-1.29	0.02	183	206	175	188	179	153	141	150	155.75	82	81	101	92	89	119	111	123	127	120
Hsp90b1	ENSCGRG00001023543		SIGN		1.11	1	1.68	2.34e-12	1.16	0.01	32138	30540	27764	30147.3	37535	30171	33143	34216	33766.2	38388	57066	48308	48629	48097.8	28541	27809	27766	37301	30354.2
Hspa5	ENSCGRG00001013777		SIGN		1.17	0.56	2.22	0	1.18	0.00429	29350	27685	25003	27346	36096	28047	30922	30907	31493	43300	73514	58330	50556	56425	25856	25922	25931	35933	28410.5
Icam1	ENSCGRG00001015045		SIGN		-1.07	1	-1.62	0	-1.22	0.000469	4243	4256	3618	4039	4249	3834	3510	3627	3805	2551	1937	2404	2496	2347	2997	2419	2572	3101	2772.25
Inka2	ENSCGRG00001010315		SIGN		-1.42	0.87	-1.92	0.00594	-1.23	0.49	48	51	47	48.67	41	28	37	30	34	25	15	29	25	23.5	34	27	35	27	30.75
Itga9	ENSCGRG00001013074		SIGN		-1.13	1	-2.43	0.02	-1.82	0.16	17	19	10	15.33	11	16	13	9	12.25	9	3	6	3	5.25	8	5	7	9	7.25
Iyd	ENSCGRG00001022969		SIGN		-3.07	0.6	-8.96	0.0069	-2.38	0.34	6	2	7	5	2	1	2	8	3.25	0	1	0	3	1	2	1	2	1	1.5
Jchain	ENSCGRG00001011544		SIGN		-1.56	0.79	-1.9	0.04	-1.15	1	22	36	22	26.67	18	14	19	15	16.5	13	10	17	11	12.75	18	16	22	19	18.75
Jmjd7	ENSCGRG00001001655		SIGN		-1.14	1	-1.63	6.65e-08	-1.34	0.00418	226	200	167	197.67	211	174	143	145	168.25	106	115	112	105	109.5	118	132	105	105	115
Klhdc9	ENSCGRG00001024811		SIGN		-1.46	0.99	-1.83	0.04	-1.08	1	42	32	27	33.67	28	17	28	29	25.5	21	11	16	28	19	25	24	26	38	28.25
Lhx6	ENSCGRG00001015355		SIGN		1.25	0.78	1.7	1.81e-05	1.06	1	95	82	74	83.67	131	95	97	84	101.75	104	157	128	126	128.75	73	74	66	102	78.75
Lif	ENSCGRG00001018334		SIGN		1.38	1.03e-08	-1.54	0	-1.1	0.24	2230	1820	1548	1866	3143	2286	2594	2011	2508.5	1052	1011	1187	1116	1091.5	1483	1335	1245	1789	1463
Loxl1	ENSCGRG00001017847		SIGN		1.15	0.16	1.52	0	1.22	0.000962	2352	2562	1968	2294	3001	2527	2482	2367	2594.25	2755	3771	3199	3121	3211.5	2192	2520	2007	3695	2603.5
Ltbp2	ENSCGRG00001012474		SIGN		-1.11	1	-1.65	6.14e-06	-1.46	0.000128	219	176	182	192.33	195	186	144	135	165	115	99	107	93	103.5	118	108	92	135	113.25
Maff	ENSCGRG00001023276		SIGN		1.05	1	-1.59	0.000176	1.14	0.44	153	151	120	141.33	179	137	144	110	142.5	71	98	68	80	79.25	130	154	102	169	138.75
Manf	ENSCGRG00001021555		SIGN		1.2	0.41	1.77	7.22e-14	1.01	1	1840	1633	1427	1633.33	2215	1732	1846	1974	1941.75	2226	3357	2670	2564	2704.25	1384	1263	1313	1766	1431.5
Mapk1ip1	ENSCGRG00001010991		SIGN		1.26	1	1.74	0.04	1.46	0.24	25	30	18	24.33	40	26	27	32	31.25	33	37	48	44	40.5	26	33	26	34	29.75
MT1	ENSCGRG00001023092		SIGN		-1.19	1	-1.83	0.05	-1.31	0.61	25	41	34	33.33	38	25	25	28	29	11	17	20	23	17.75	26	20	15	26	21.75
Myh7b	ENSCGRG00001023442		SIGN		1.2	1	2.22	7.72e-06	-1.22	0.71	44	37	43	41.33	54	50	36	44	46	62	131	86	50	82.25	33	24	25	29	27.75
Myo1g	ENSCGRG00001017997		SIGN		-1.35	1	-1.63	0.04	-1.45	0.07	48	58	43	49.67	33	43	37	29	35.5	23	30	30	28	27.75	29	28	25	41	30.75
Nat14	ENSCGRG00001018762		SIGN		2.52	0.07	2.27	0.03	1.05	1	9	6	4	6.33	17	17	14	16	16	10	19	12	13	13.5	5	5	6	6	5.5
ND4	ENSCGRG00001000028		SIGN		1.09	1	1.5	3.69e-05	1.36	7.57e-10	33393	23361	21141	25965	33658	26678	22437	33313	29021.5	28016	45576	38166	37294	37263	28892	27879	27214	34069	29513.5
Ngly1	ENSCGRG00001015315		SIGN		-1.14	0.9	-1.53	1.99e-07	1.12	0.36	261	264	240	255	236	233	211	231	227.75	128	161	172	180	160.25	250	210	233	248	235.25
Nlgn1	ENSCGRG00001012016		SIGN		-1.01	1	-1.97	0.02	1.12	1	32	35	29	32	34	28	42	35	34.75	16	10	12	29	16.75	30	31	25	36	30.5
Nsun3	ENSCGRG00001013850		SIGN		-1.26	0.53	-1.57	0.000194	-1.04	1	160	155	150	155	134	132	113	109	122	91	73	107	97	92	124	110	125	105	116
Nxpe4	ENSCGRG00001011592		SIGN		-1.05	1	-2.29	4.01e-09	-1.49	0.01	109	76	89	91.33	108	86	72	104	92.5	35	39	34	51	39.75	57	47	44	47	48.75
Oasl1	ENSCGRG00001021080		SIGN		-1.25	0.38	-1.53	8.22e-05	1.22	0.11	134	142	118	131.33	121	96	93	139	112.25	77	79	92	96	86	137	142	107	167	138.25
Oxnad1	ENSCGRG00001021866		SIGN		-1.08	1	-1.51	4.62e-07	-1.16	0.18	273	273	245	263.67	257	244	264	232	249.25	150	155	163	202	167.5	200	173	174	203	187.5
P4ha1	ENSCGRG00001007006		SIGN		1.21	0.01	1.51	0	1.36	3.2e-08	1989	1811	1523	1774.33	2520	1921	2057	1926	2106	2001	3005	2484	2409	2474.75	1964	1906	1918	2619	2101.75
P4ha2	ENSCGRG00001012916		SIGN		1.08	1	1.53	0.000172	1.05	1	157	152	98	135.67	182	129	119	141	142.75	153	244	187	174	189.5	121	114	106	170	127.75
Parpbp	ENSCGRG00001016323		SIGN		-1.14	0.52	-1.81	0	-1.03	1	740	733	683	718.67	687	659	589	616	637.75	368	286	441	417	378	572	535	583	638	582
Pdia3	ENSCGRG00001008721		SIGN		1.11	0.65	1.51	0	1.27	5.84e-06	9151	8810	8260	8740.33	10310	8808	10127	10197	9860.5	10016	13959	13187	13462	12656	8836	8737	9312	11658	9635.75
Pdia4	ENSCGRG00001005477		SIGN		1.1	0.78	1.99	0	1.12	0.09	4202	4009	3571	3927.33	4853	3912	4150	4145	4265	5804	9053	7438	6739	7258.5	3632	3473	3536	4431	3768
Phlda1	ENSCGRG00001012896		SIGN		1.03	1	-1.51	6.67e-07	1.38	6.2e-05	313	263	180	252	318	247	235	183	245.75	155	145	141	143	146	302	325	202	414	310.75
Plcd3	ENSCGRG00001017565		SIGN		1.17	0.78	1.6	1.08e-08	-1.38	0.00325	190	159	140	163	216	182	176	169	185.75	204	278	248	221	237.75	111	87	87	113	99.5
Plpp6	ENSCGRG00001012981		SIGN		-1.38	0.86	-1.77	0.00772	1.11	0.94	65	69	45	59.67	49	51	36	30	41.5	28	25	35	32	30	52	49	59	57	54.25
Poln	ENSCGRG00001007876		SIGN		-1.28	1	1.78	0.04	1.32	0.58	22	23	19	21.33	21	14	15	18	17	27	39	41	39	36.5	24	21	23	18	21.5
Prdm5	ENSCGRG00001010581		SIGN		1.1	1	1.51	4.71e-10	1.13	0.26	387	386	330	367.67	433	421	348	402	401	422	635	514	502	518.25	335	348	316	447	361.5
Pspc1	ENSCGRG00001018368		SIGN		-1.11	0.91	-1.95	0	-1.01	1	956	915	887	919.33	905	785	818	936	861	454	404	468	511	459.25	727	711	772	851	765.25
Pstk	ENSCGRG00001019704		SIGN		1.13	1	1.68	1.19e-05	1.13	0.6	108	108	72	96	115	93	104	114	106.5	130	162	173	131	149	96	87	78	111	93
Pygl	ENSCGRG00001020410		SIGN		-1.16	0.8	-1.56	3.8e-07	-1.01	1	219	223	198	213.33	215	173	183	182	188.25	128	113	127	158	131.5	182	150	177	183	173
Pygm	ENSCGRG00001017923		SIGN		1.06	1	1.7	0.04	-1.56	0.2	39	31	20	30	43	24	23	35	31.25	39	64	43	40	46.5	21	11	14	47	23.25
Rab3a	ENSCGRG00001021376		SIGN		1.46	0.05	1.51	0.00292	1.01	1	92	81	53	75.33	129	104	91	93	104.25	92	135	96	77	100	60	66	56	69	62.75
Rbm3	ENSCGRG00001018909		SIGN		-1.15	0.37	-1.85	0	-1.13	0.13	898	808	772	826	795	605	745	612	689.25	385	410	488	320	400.75	709	516	539	568	583
Rbm4b	ENSCGRG00001024693		SIGN		1.46	0.07	1.6	0.000786	-1.01	1	69	71	55	65	130	89	72	81	93	75	131	81	93	95	43	63	49	68	55.75
Rgl3	ENSCGRG00001012320		SIGN		1.05	1	3.04	0.01	1.47	0.7	5	9	3	5.67	14	3	1	5	5.75	17	12	19	13	15.25	6	7	7	11	7.75
Rgs12	ENSCGRG00001009377		SIGN		-1.27	0.23	-1.67	1.49e-07	-1.24	0.02	340	323	252	305	254	241	246	223	241	179	139	174	193	171.25	195	186	210	213	201
Rgs17	ENSCGRG00001008622		SIGN		1.14	1	1.54	0.01	1.28	0.35	32	54	40	42	42	53	51	50	49	55	62	64	69	62.5	46	43	40	63	48
Rhbdl1	ENSCGRG00001001686		SIGN		1.53	1	2.94	0.01	-1.67	0.78	6	5	2	4.33	8	4	6	5	5.75	12	14	12	3	10.25	1	3	2	6	3
Rnpc3	ENSCGRG00001019276		SIGN		1.07	1	1.53	2.38e-11	-1.14	0.21	449	451	383	427.67	470	486	433	403	448	490	650	683	587	602.5	297	294	318	388	324.25
Rprd1a	ENSCGRG00001013116		SIGN		1.12	1	1.52	0.00213	-1.28	0.17	89	98	50	79	106	86	73	89	88.5	103	114	116	113	111.5	47	56	44	63	52.5
Samd4	ENSCGRG00001012862		SIGN		-1.04	1	-1.5	4.36e-08	-1.14	0.22	381	366	319	355.33	385	352	318	267	330.5	231	192	219	210	213	246	261	243	274	256
Sdcbp2	ENSCGRG00001000837		SIGN		-1.39	1	-3.6	0.00706	1.55	0.3	15	12	6	11	14	5	5	8	8	2	1	5	3	2.75	15	13	13	12	13.25
Sdf2l1	ENSCGRG00001023473		SIGN		1.09	1	1.58	0	1.01	1	1374	1343	945	1220.67	1558	1326	1100	1116	1275	1575	2236	1578	1545	1733.5	1024	949	989	1180	1035.5
Sdk2	ENSCGRG00001025056		SIGN		-1.09	1	-1.69	0.000198	-1.17	0.46	99	105	79	94.33	99	90	84	74	86.75	56	45	43	64	52	74	57	63	83	69.25
Senp7	ENSCGRG00001015956		SIGN		1.2	0.14	1.66	0	1.08	0.66	419	407	345	390.33	513	445	478	445	470.25	544	635	605	652	609	341	352	322	516	382.75
Sepsecs	ENSCGRG00001023389		SIGN		-1.34	0.000377	-1.56	2.19e-10	-1.18	0.07	446	438	384	422.67	319	341	295	316	317.75	254	231	269	274	257	305	271	291	324	297.75
Sesn2	ENSCGRG00001020650		SIGN		-1.43	0.00694	-1.62	3.66e-06	-1.05	1	147	127	142	138.67	106	96	98	85	96.25	72	81	81	83	79.25	87	100	135	167	122.25
Sh2b3	ENSCGRG00001024395		SIGN		-1.05	1	-1.54	4.23e-12	-1.48	1.48e-09	824	733	530	695.67	779	675	558	557	642.25	429	392	423	379	405.75	454	341	332	502	407.25
Slc6a9	ENSCGRG00001019140		SIGN		-1.22	1	-1.82	4.33e-05	-1.17	0.62	87	99	68	84.67	60	80	77	56	68.25	37	48	38	48	42.75	61	47	67	59	58.5
Slc7a11	ENSCGRG00001013535		SIGN		-1.23	1	-1.97	1.31e-05	-1.16	0.59	72	83	65	73.33	60	61	66	44	57.75	38	31	28	38	33.75	43	55	54	73	56.25
Smpd3	ENSCGRG00001013434		SIGN		1.77	0.3	1.97	0.01	1.29	0.77	20	15	21	18.67	45	28	26	31	32.5	28	41	35	31	33.75	26	21	11	22	20
Snx14	ENSCGRG00001014424		SIGN		-1.11	1	-1.52	1.74e-11	-1.08	0.58	715	704	653	690.67	699	611	619	678	651.75	420	355	470	543	447	534	464	552	632	545.5
Spata20	ENSCGRG00001006141		SIGN		-1.07	1	-1.78	0.05	-1.01	1	39	34	32	35	40	19	42	31	33	14	19	21	20	18.5	35	22	27	33	29.25
Spef1	ENSCGRG00001021469		SIGN		2.68	0.76	4.5	0.00998	2.94	0.13	2	2	2	2	8	5	4	5	5.5	5	13	8	9	8.75	4	4	7	3	4.5
Sprr1a	ENSCGRG00001008433		SIGN		1.14	1	2.09	3.91e-06	1.39	0.14	42	33	36	37	43	32	56	39	42.5	58	84	72	80	73.5	45	43	36	61	46.25
Spsb4	ENSCGRG00001018096		SIGN		1.08	1	1.58	1.54e-07	-1.18	0.26	168	147	113	142.67	175	150	134	154	153.25	186	240	205	208	209.75	109	83	98	151	110.25
Srsf5	ENSCGRG00001015339		SIGN		-1.44	9.02e-12	-1.63	0	-1.47	2.21e-13	3134	3433	2782	3116.33	2339	2383	1973	1896	2147.75	1830	1662	1694	1928	1778.5	1677	1563	1869	1740	1712.25
Stip1	ENSCGRG00001018895		SIGN		1.24	0.12	1.73	1.68e-13	1.29	1.33e-06	6971	6901	5647	6506.33	9540	7098	7555	7373	7891.5	8229	13324	10375	9634	10390.5	6862	7413	6025	11326	7906.5
Stxbp4	ENSCGRG00001023598		SIGN		1.19	0.61	1.6	9.77e-09	1.27	0.02	174	169	153	165.33	194	215	197	188	198.5	210	264	252	282	252	183	159	163	226	182.75
Syt11	ENSCGRG00001023824		SIGN		1.45	0.34	1.96	4e-05	1.47	0.07	40	45	20	35	53	47	45	59	51	54	83	62	59	64.5	46	41	36	55	44.5
Tada2a	ENSCGRG00001018460		SIGN		1.3	0.18	2.07	0	1.11	0.6	218	183	159	186.67	278	217	228	231	238.5	284	455	353	340	358	165	178	153	198	173.5
Tatdn1	ENSCGRG00001010074		SIGN		-1.11	1	-1.74	0	-1.02	1	437	391	353	393.67	424	335	325	322	351.5	219	180	221	221	210.25	312	294	326	375	326.75
Tatdn3	ENSCGRG00001019330		SIGN		-1.07	1	-1.6	0.0044	-1.1	0.99	66	67	71	68	68	66	66	60	65	38	30	44	52	41	56	45	49	47	49.25
Tbc1d2	ENSCGRG00001005454		SIGN		-1.18	0.76	-1.69	2.32e-08	-1.39	0.00126	195	180	165	180	169	161	134	121	146.25	88	93	116	85	95.5	108	83	122	83	99
Tcta	ENSCGRG00001010040		SIGN		-1.26	1	-2	0.02	-1.21	0.96	28	21	15	21.33	23	16	14	19	18	9	9	9	15	10.5	13	19	10	25	16.75
Tctn3	ENSCGRG00001019574		SIGN		-1.21	0.33	-1.51	3.33e-06	-1.32	0.0048	238	212	192	214	189	175	165	189	179.5	138	120	142	142	135.5	142	105	145	129	130.25
Tep1	ENSCGRG00001014974		SIGN		-1.06	1	-1.54	7.22e-14	-1.04	1	1116	1070	854	1013.33	1107	960	851	822	935	620	521	664	595	600	889	704	758	892	810.75
Tfap2e	ENSCGRG00001004504		SIGN		-1.11	1	-2.14	0.00564	-1.63	0.13	39	32	25	32	33	31	30	15	27.25	13	8	14	17	13	17	16	14	7	13.5
Tgm1	ENSCGRG00001021314		SIGN		1.29	1	2.13	0.00989	1.88	0.08	16	12	8	12	20	13	14	10	14.25	16	34	21	17	22	18	23	13	46	25
Tha1	ENSCGRG00001015743		SIGN		-1.1	1	-1.78	0.04	-1.64	0.16	33	25	26	28	27	25	24	24	25	9	14	22	13	14.5	14	16	11	18	14.75
Thbs1	ENSCGRG00001002618		SIGN		-1.23	0.00537	-1.84	0	-1.31	5.52e-06	1576	1428	1237	1413.67	1200	1143	1183	998	1131	764	570	764	752	712.5	863	802	935	992	898
Themis2	ENSCGRG00001024729		SIGN		-2.63	0.64	-5.08	0.03	-2.4	0.27	9	8	2	6.33	2	4	1	2	2.25	2	1	0	1	1	3	2	1	4	2.5
Tlr2	ENSCGRG00001013303		SIGN		-1.13	1	-1.52	0.000482	-1.46	0.000317	184	171	138	164.33	140	142	147	151	145	116	80	116	92	101	96	91	83	125	98.75
Tmed6	ENSCGRG00001016076		SIGN		2.01	0.93	2.89	0.03	2.09	0.2	1	8	5	4.67	14	5	8	9	9	9	19	12	9	12.25	9	6	9	13	9.25
Tmem143	ENSCGRG00001004118		SIGN		1.17	1	1.73	8.95e-05	-1.09	1	76	65	35	58.67	90	59	52	67	67	81	96	109	82	92	59	33	37	58	46.75
Tmem222	ENSCGRG00001020116		SIGN		-1.21	1	-1.82	2.64e-06	-1.15	0.6	132	111	115	119.33	99	99	93	116	101.75	59	53	80	63	63.75	93	84	73	96	86.5
Tmem267	ENSCGRG00001003827		SIGN		1.49	0.04	1.64	0.000288	1.2	0.37	85	62	53	66.67	93	95	103	99	97.5	76	124	118	86	101	71	58	64	81	68.5
Tmem35b	ENSCGRG00001000432		SIGN		-1.2	1	-1.61	0.00048	1.05	1	116	115	91	107.33	89	96	91	79	88.75	61	51	69	67	62	86	87	100	110	95.75
Tnfrsf25	ENSCGRG00001000400		SIGN		2.5	0.65	3.77	0.01	-1.05	1	4	2	2	2.67	8	7	8	5	7	6	10	11	13	10	0	5	1	4	2.5
Traf1	ENSCGRG00001011799		SIGN		-1.14	1	-1.54	0.0045	-1.36	0.05	106	81	68	85	78	85	63	73	74.75	56	37	59	54	51.5	61	46	43	52	50.5
Trappc13	ENSCGRG00001017097		SIGN		1.17	0.59	1.53	1.28e-08	1.4	3.51e-05	254	225	196	225	311	236	244	296	271.75	284	334	350	365	333.25	267	236	257	293	263.25
Trex2	ENSCGRG00001012110		SIGN		2.02	0.33	2.6	0.00385	1.42	0.62	16	6	6	9.33	24	15	17	17	18.25	17	29	23	18	21.75	11	9	12	16	12
Tspan17	ENSCGRG00001017354		SIGN		-1.11	1	-1.64	1.68e-10	-1.33	0.000969	331	291	252	291.33	289	263	246	246	261	158	140	191	172	165.25	189	151	188	220	187
Ubfd1	ENSCGRG00001010229		SIGN		1.29	0.000154	1.5	7.22e-14	1.15	0.05	1298	1084	918	1100	1556	1359	1302	1392	1402.25	1246	1743	1676	1483	1537	1071	1030	935	1342	1094.5
Ublcp1	ENSCGRG00001019223		SIGN		-1.17	0.67	-1.62	9.57e-09	1.15	0.21	204	253	242	233	214	177	221	190	200.5	125	128	144	148	136.25	214	220	216	284	233.5
Usf3	ENSCGRG00001000409		SIGN		-1.07	1	-1.58	1.58e-05	-1.02	1	268	254	198	240	228	223	255	172	219.5	145	119	137	153	138.5	211	180	173	197	190.25
Usp51	ENSCGRG00001009830		SIGN		1.29	0.6	1.75	7.48e-06	-1.18	0.69	52	61	51	54.67	65	80	66	72	70.75	74	93	106	90	90.75	42	29	41	39	37.75
Vrk2	ENSCGRG00001013709		SIGN		-1.12	1	-1.5	1.77e-06	1.03	1	253	238	212	234.33	208	211	220	220	214.75	153	122	157	170	150.5	207	184	193	195	194.75
Wdr27	ENSCGRG00001024854		SIGN		-1.97	0.09	-2.02	0.01	-1.51	0.34	23	23	25	23.67	15	8	12	14	12.25	10	10	14	11	11.25	9	14	15	20	14.5
Zadh2	ENSCGRG00001023041		SIGN		-1.18	0.52	-1.81	2.31e-13	-1.42	9.68e-05	264	272	211	249	225	220	207	236	222	130	106	132	176	136	138	135	150	156	144.75
Zbtb40	ENSCGRG00001016016		SIGN		1.19	0.09	1.67	0	-1.16	0.06	761	755	625	713.67	1021	801	736	760	829.5	941	1266	1138	1012	1089.25	553	484	441	648	531.5
Zc2hc1a	ENSCGRG00001015367		SIGN		-1.43	0.00804	-1.6	1.02e-05	-1.22	0.06	249	220	214	227.67	157	190	144	136	156.75	143	104	138	141	131.5	152	144	154	153	150.75
Zc3h6	ENSCGRG00001022022		SIGN		-1.24	1	-2.03	0.00562	-1.15	1	28	39	30	32.33	23	32	27	17	24.75	13	13	15	16	14.25	25	19	24	30	24.5
Zcwpw1	ENSCGRG00001015211		SIGN		1.12	1	1.84	0.04	1.13	1	13	27	18	19.33	22	19	23	25	22.25	20	46	36	38	35	22	12	19	40	23.25
Zfand1	ENSCGRG00001014683		SIGN		-1.22	0.18	-1.8	0	-1.02	1	296	312	296	301.33	269	272	231	227	249.75	138	154	157	187	159	252	227	232	261	243
Zfp322a	ENSCGRG00001023553		SIGN		1.57	0.05	1.75	0.000387	-1.24	0.49	49	42	39	43.33	75	63	76	62	69	49	86	69	86	72.5	34	26	24	36	30
Zfp341	ENSCGRG00001014101		SIGN		1.16	1	1.54	0.000494	-1.27	0.2	112	114	74	100	138	104	110	108	115	120	173	130	148	142.75	83	52	54	103	73
Zfp423	ENSCGRG00001023063		SIGN		1.04	1	1.77	0	-1.05	1	398	348	295	347	408	353	324	348	358.25	446	692	586	575	574.75	265	258	276	380	294.75
Zfp426	ENSCGRG00001008196		SIGN		1.35	0.37	1.54	0.00317	1.48	0.01	66	66	52	61.33	93	79	73	89	83.5	64	110	97	87	89.5	70	86	62	101	79.75
Zfp523	ENSCGRG00001020582		SIGN		-1.31	0.00343	-1.72	0	-1.3	0.000876	396	415	358	389.67	312	335	260	276	295.75	217	206	204	215	210.5	274	211	237	277	249.75
Zfp605	ENSCGRG00001025071		SIGN		1.25	0.2	1.83	1.68e-13	1.23	0.07	155	152	119	142	207	158	185	168	179.5	212	253	248	268	245.25	143	139	140	206	157
Zfp623	ENSCGRG00001009589		SIGN		1.36	0.2	1.51	0.00166	-1.18	0.47	107	92	63	87.33	142	100	115	116	118.25	115	135	116	123	122.25	74	51	53	95	68.25
Zfp787	ENSCGRG00001000277		SIGN		1.35	0.06	1.69	1.26e-07	1.13	0.64	99	102	86	95.67	130	127	124	133	128.5	130	185	147	140	150.5	93	89	78	109	92.25
Zfp94	ENSCGRG00001012640		SIGN		1.4	0.38	1.57	0.00649	-1.03	1	48	54	33	45	75	61	52	66	63.5	60	66	73	68	66.75	36	37	31	31	33.75
Ccdc117	ENSCGRG00001008578	SIGN			1.58	1.73e-05	1.44	0.000367	1.23	0.03	209	231	214	218	398	264	405	344	352.75	250	320	296	339	301.25	207	257	185	419	267
Ddit3	ENSCGRG00001015590	SIGN			1.51	0.03	1.35	0.07	1.11	0.94	72	57	65	64.67	111	66	123	101	100.25	74	77	93	94	84.5	59	69	45	126	74.75
Ier5l	ENSCGRG00001010079	SIGN			2.08	3.18e-12	1.39	0.00945	1.34	0.04	76	79	66	73.67	174	138	149	148	152.25	79	105	108	90	95.5	77	83	78	85	80.75
Kansl1l	ENSCGRG00001021527	SIGN			1.54	5.17e-07	1.32	0.00179	1.47	5.26e-06	203	174	170	182.33	339	240	274	310	290.75	215	233	222	265	233.75	214	208	226	289	234.25
Sertad3	ENSCGRG00001001744	SIGN			1.51	0.03	1.01	1	1.2	0.56	80	61	61	67.33	114	86	120	88	102	55	62	64	74	63.75	63	87	46	95	72.75
Six4	ENSCGRG00001015581	SIGN			1.51	2.72e-05	1.25	0.03	-1.22	0.02	488	482	384	451.33	830	544	733	632	684.75	447	545	552	583	531.75	328	321	243	417	327.25

## Sheet: Table_S2a_IPA
Table S2. List of the 50 most enriched pathways based on Ingenuity Pathway Analysis (40 °C, 1 h compared to 37 °C)
Ingenuity Canonical Pathways	-log(B-H p-value)	Ratio	Molecules
Aldosterone Signaling in Epithelial Cells	4.76	0.038	DNAJB1, DUSP1, HSPA1A/HSPA1B, HSPA8, HSPB1, HSPH1
Unfolded protein response	3.97	0.0714	DDIT3, HSPA1A/HSPA1B, HSPA8, HSPH1
Protein Ubiquitination Pathway	2.6	0.0183	DNAJB1, HSPA1A/HSPA1B, HSPA8, HSPB1, HSPH1
Huntington's Disease Signaling	1.81	0.0169	DNAJB1, HSPA1A/HSPA1B, HSPA8, JUN
Role of PKR in Interferon Induction and Antiviral Response	1.75	0.0256	HSPA1A/HSPA1B, HSPA8, JUN
p38 MAPK Signaling	1.75	0.0254	DDIT3, DUSP1, HSPB1
Glucocorticoid Receptor Signaling	1.49	0.0119	DUSP1, HSPA1A/HSPA1B, HSPA8, JUN
BAG2 Signaling Pathway	1.46	0.0465	HSPA1A/HSPA1B, HSPA8
Death Receptor Signaling	0.87	0.022	HSPB1, TIPARP
UVA-Induced MAPK Signaling	0.863	0.0204	JUN, TIPARP
SAPK/JNK Signaling	0.863	0.0196	DUSP8, JUN
Aryl Hydrocarbon Receptor Signaling	0.77	0.014	HSPB1, JUN
HMGB1 Signaling	0.77	0.0121	IL11, JUN
Androgen Signaling	0.77	0.0147	DNAJB1, JUN
Protein Kinase A Signaling	0.77	0.0075	DUSP1, DUSP8, PTP4A1
eNOS Signaling	0.77	0.0126	HSPA1A/HSPA1B, HSPA8
D-myo-inositol-5-phosphate Metabolism	0.77	0.0128	DUSP1, DUSP8
D-myo-inositol (1,4,5,6)-Tetrakisphosphate Biosynthesis	0.77	0.0142	DUSP1, DUSP8
D-myo-inositol (3,4,5,6)-tetrakisphosphate Biosynthesis	0.77	0.0142	DUSP1, DUSP8
3-phosphoinositide Degradation	0.77	0.0129	DUSP1, DUSP8
3-phosphoinositide Biosynthesis	0.77	0.0121	DUSP1, DUSP8
IL-6 Signaling	0.77	0.016	HSPB1, JUN
Natural Killer Cell Signaling	0.754	0.0102	HSPA1A/HSPA1B, HSPA8
NRF2-mediated Oxidative Stress Response	0.754	0.0106	DNAJB1, JUN
Hepatic Cholestasis	0.754	0.0108	IL11, JUN
RAR Activation	0.754	0.0103	DUSP1, JUN
IL-17A Signaling in Gastric Cells	0.754	0.04	JUN
Superpathway of Inositol Phosphate Compounds	0.754	0.0101	DUSP1, DUSP8
ERK/MAPK Signaling	0.754	0.0104	DUSP1, HSPB1
Endoplasmic Reticulum Stress Pathway	0.754	0.0476	DDIT3
Cardiac Hypertrophy Signaling (Enhanced)	0.754	0.0062	HSPB1, IL11, JUN
Role of Osteoblasts, Osteoclasts and Chondrocytes in Rheumatoid Arthritis	0.706	0.0091	IL11, JUN
TNFR2 Signaling	0.706	0.0333	JUN
4-1BB Signaling in T Lymphocytes	0.69	0.0312	JUN
Cardiac Hypertrophy Signaling	0.688	0.0083	HSPB1, JUN
Inhibition of Angiogenesis by TSP1	0.688	0.0294	JUN
IL-17A Signaling in Fibroblasts	0.688	0.0286	JUN
MIF Regulation of Innate Immunity	0.658	0.0238	JUN
B Cell Activating Factor Signaling	0.658	0.0244	JUN
April Mediated Signaling	0.658	0.0256	JUN
Role of IL-17F in Allergic Inflammatory Airway Diseases	0.658	0.0238	IL11
iNOS Signaling	0.658	0.0222	JUN
Apelin Pancreas Signaling Pathway	0.658	0.0227	DDIT3
Systemic Lupus Erythematosus In B Cell Signaling Pathway	0.658	0.0073	IL11, JUN
IL-10 Signaling	0.646	0.0145	JUN
Erythropoietin Signaling	0.646	0.0132	JUN
Activation of IRF by Cytosolic Pattern Recognition Receptors	0.646	0.0159	JUN
LPS-stimulated MAPK Signaling	0.646	0.0122	JUN
CD40 Signaling	0.646	0.0154	JUN
CD27 Signaling in Lymphocytes	0.646	0.0189	JUN

## Sheet: Table_S2b_IPA
Table S2. List of the 50 most enriched pathways based on Ingenuity Pathway Analysis (40 °C, 6 h compared to 37 °C)
Ingenuity Canonical Pathways	-log(B-H p-value)	Ratio	Molecules
Aldosterone Signaling in Epithelial Cells	3.99	0.0759	DNAJA1, DNAJB1, Dnajb3, DNAJC30, HSP90B1, HSPA1A/HSPA1B, HSPA5, HSPA8, HSPB1, HSPH1, PDIA3, PLCD3
Unfolded protein response	2.17	0.107	ATF4, HSP90B1, HSPA1A/HSPA1B, HSPA5, HSPA8, HSPH1
Protein Ubiquitination Pathway	2.05	0.044	BIRC3, DNAJA1, DNAJB1, Dnajb3, DNAJC30, HSP90B1, HSPA1A/HSPA1B, HSPA5, HSPA8, HSPB1, HSPH1, USP51
Huntington's Disease Signaling	1.03	0.038	ATF4, CAPN8, DNAJB1, GNB1L, GNB3, HDAC9, HSPA1A/HSPA1B, HSPA5, HSPA8
Selenocysteine Biosynthesis II (Archaea and Eukaryotes)	1.03	0.333	PSTK, SEPSECS
Endoplasmic Reticulum Stress Pathway	1.03	0.143	ATF4, HSP90B1, HSPA5
Protein Kinase A Signaling	0.975	0.0302	AKAP3, AKAP7, ATF4, DUSP15, GNB1L, GNB3, H1-0, PDIA3, PLCD3, PTP4A1, PYGL, PYGM
Circadian Rhythm Signaling	0.672	0.0909	ATF4, BHLHE40, GRIN2D
TWEAK Signaling	0.672	0.0857	BIRC3, TNFRSF25, TRAF1
Glycogen Degradation II	0.672	0.167	PYGL, PYGM
Agranulocyte Adhesion and Diapedesis	0.672	0.0363	Ccl2, Ccl7, CXCL10, CXCL12, CXCL2, ICAM1, MYH7B
Glycogen Degradation III	0.606	0.143	PYGL, PYGM
Synaptogenesis Signaling Pathway	0.606	0.0288	ATF4, EIF4EBP3, GRIN2D, HSPA8, NLGN1, RAB3A, STXBP4, SYT11, THBS1
BAG2 Signaling Pathway	0.556	0.0698	HSPA1A/HSPA1B, HSPA5, HSPA8
NRF2-mediated Oxidative Stress Response	0.513	0.0317	AOX1, ATF4, DNAJA1, DNAJB1, MAFF, STIP1
Dendritic Cell Maturation	0.513	0.0328	ATF4, CCR7, ICAM1, PDIA3, PLCD3, TLR2
P2Y Purigenic Receptor Signaling Pathway	0.513	0.0394	ATF4, GNB1L, GNB3, PDIA3, PLCD3
Palmitate Biosynthesis I (Animals)	0.513	0.5	OXSM
Fatty Acid Biosynthesis Initiation II	0.513	0.5	OXSM
Granulocyte Adhesion and Diapedesis	0.513	0.0333	Ccl2, Ccl7, CXCL10, CXCL12, CXCL2, ICAM1
Death Receptor Signaling	0.513	0.044	BIRC3, CRADD, HSPB1, TNFRSF25
Ephrin Receptor Signaling	0.513	0.0333	ATF4, CXCL12, GNB1L, GNB3, GRIN2D, SH2D3C
α-Adrenergic Signaling	0.493	0.0417	GNB1L, GNB3, PYGL, PYGM
CREB Signaling in Neurons	0.46	0.029	ATF4, GNB1L, GNB3, GRIN2D, PDIA3, PLCD3
Diphthamide Biosynthesis	0.46	0.333	DPH6
D-myo-inositol-5-phosphate Metabolism	0.46	0.0321	DUSP15, MTMR7, PLCD3, PLPP6, UBLCP1
1, 25-dihydroxyvitamin D3 Biosynthesis	0.46	0.333	CYP27B1
Thyroid Hormone Biosynthesis	0.46	0.333	IYD
Gαs Signaling	0.46	0.0374	ATF4, GNB1L, GNB3, RGS2
Wnt/Ca+ pathway	0.46	0.0484	ATF4, PDIA3, PLCD3
CD40 Signaling	0.447	0.0462	FCER2, ICAM1, TRAF1
Role of NFAT in Cardiac Hypertrophy	0.447	0.028	GNB1L, GNB3, HDAC9, LIF, PDIA3, PLCD3
Role of PKR in Interferon Induction and Antiviral Response	0.444	0.0342	HSP90B1, HSPA1A/HSPA1B, HSPA5, HSPA8
TNFR2 Signaling	0.444	0.0667	BIRC3, TRAF1
Dopamine-DARPP32 Feedback in cAMP Signaling	0.444	0.0307	ATF4, GRIN2D, KCNJ14, PDIA3, PLCD3
Phenylethylamine Degradation I	0.444	0.25	AOC2
Glutathione Redox Reactions II	0.444	0.25	PDIA3
Proline Biosynthesis I	0.444	0.25	ALDH18A1
G Protein Signaling Mediated by Tubby	0.435	0.0645	GNB1L, GNB3
Ephrin B Signaling	0.434	0.0417	CXCL12, GNB1L, GNB3
Synaptic Long Term Potentiation	0.41	0.031	ATF4, GRIN2D, PDIA3, PLCD3
VDR/RXR Activation	0.41	0.0385	CST6, CXCL10, CYP27B1
TREM1 Signaling	0.41	0.04	CXCL2, ICAM1, TLR2
Role of JAK2 in Hormone-like Cytokine Signaling	0.41	0.0588	Irs3, SH2B3
Phagosome Formation	0.41	0.032	FCER2, PDIA3, PLCD3, TLR2
Neuroinflammation Signaling Pathway	0.41	0.0233	ATF4, BIRC3, CXCL10, CXCL12, GRIN2D, ICAM1, TLR2
Endocannabinoid Neuronal Synapse Pathway	0.41	0.0312	GNB3, GRIN2D, PDIA3, PLCD3
Hepatic Fibrosis / Hepatic Stellate Cell Activation	0.401	0.0269	CCR7, COL24A1, CXCL2, ICAM1, MYH7B
Opioid Signaling Pathway	0.391	0.0243	ATF4, GNB3, GRIN2D, PDK1, RGS12, RGS17
Role of Macrophages, Fibroblasts and Endothelial Cells in Rheumatoid Arthritis	0.377	0.0224	ATF4, CXCL12, ICAM1, PDIA3, PLCD3, TLR2, TRAF1

## Sheet: Table_S2c_IPA
Table S2. List of the 50 most enriched pathways based on Ingenuity Pathway Analysis (42.5 °C, 1 h compared to 37 °C)
Ingenuity Canonical Pathways	-log(B-H p-value)	Ratio	Molecules
IL-6 Signaling	3.88	0.128	CEBPB, FOS, HSPB1, IL6, JUN, MAP2K7, MAP3K14, MCL1, NFKBIA, PIK3R4, PIK3R5, SOCS3, TAB1, TNFRSF1A, TNFRSF1B, TRAF6
Aldosterone Signaling in Epithelial Cells	3	0.101	DNAJA1, DNAJB1, DNAJB4, DNAJB7, DNAJC27, DUSP1, HSP90AA1, HSPA1A/HSPA1B, HSPA8, HSPB1, HSPB8, HSPH1, NR3C2, PIK3R4, PIK3R5, SGK1
PPAR Signaling	3	0.125	CREBBP, FOS, HSP90AA1, JUN, MAP3K14, NFKBIA, NR2F1, PTGS2, SCAND1, TAB1, TNFRSF1A, TNFRSF1B, TRAF6
CD40 Signaling	2.99	0.154	FOS, JUN, MAP2K7, MAP3K14, NFKBIA, PIK3R4, PIK3R5, PTGS2, TNFAIP3, TRAF6
Glucocorticoid Receptor Signaling	2.88	0.0714	CEBPB, CREBBP, CXCL2, DUSP1, ERCC2, FOS, GTF2E1, HSP90AA1, HSPA1A/HSPA1B, HSPA8, IL6, JUN, KRT7, MAP2K7, MAP3K14, NFKBIA, NR3C2, PIK3R4, PIK3R5, PTGS2, SGK1, TAB1, TRAF6, UBE2I
Production of Nitric Oxide and Reactive Oxygen Species in Macrophages	2.88	0.0904	APOE, CREBBP, FOS, JUN, MAP2K7, MAP3K11, MAP3K14, NFKBIA, PIK3R4, PIK3R5, PPP1R10, PPP2CA, RAC3, RHOB, RHOBTB1, TNFRSF1A, TNFRSF1B
SAPK/JNK Signaling	2.88	0.118	DUSP10, DUSP8, FADD, JUN, MAP2K7, MAP3K11, MAP4K2, MAPK8IP3, PIK3R4, PIK3R5, RAC3, TAB1
IL-17A Signaling in Fibroblasts	2.73	0.2	CEBPB, FOS, IL6, JUN, NFKBIA, NFKBIZ, TRAF6
Toll-like Receptor Signaling	2.73	0.132	FOS, JUN, MAP3K14, NFKBIA, TAB1, TICAM1, TLR6, TNFAIP3, TRAF6, Ubb
HMGB1 Signaling	2.69	0.0909	CNTF, FOS, IL11, IL6, JUN, MAP2K7, PIK3R4, PIK3R5, RAC3, RHOB, RHOBTB1, SP1, TNFRSF1A, TNFRSF1B, TNFSF4
TNFR1 Signaling	2.66	0.16	FADD, FOS, JUN, MAP3K14, MAP4K2, NFKBIA, TNFAIP3, TNFRSF1A
Role of PKR in Interferon Induction and Antiviral Response	2.52	0.103	ATF3, FADD, FOS, HSP90AA1, HSPA1A/HSPA1B, HSPA8, JUN, MAP2K7, NFKBIA, SP1, TNFRSF1A, TRAF6
IL-10 Signaling	2.47	0.13	FOS, IL6, JUN, MAP3K14, NFKBIA, SOCS3, SP1, TAB1, TRAF6
TNFR2 Signaling	2.39	0.2	FOS, JUN, MAP3K14, NFKBIA, TNFAIP3, TNFRSF1B
Activation of IRF by Cytosolic Pattern Recognition Receptors	2.07	0.127	ADAR, CREBBP, DHX58, FADD, IL6, JUN, NFKBIA, TRAF6
Role of Osteoblasts, Osteoclasts and Chondrocytes in Rheumatoid Arthritis	2	0.0727	APC2, CTSK, FOS, FZD4, FZD7, IL11, IL6, JUN, MAP2K7, MAP3K14, NFKBIA, PIK3R4, PIK3R5, TNFRSF1A, TNFRSF1B, TRAF6
NF-κB Signaling	1.99	0.0782	CREBBP, FADD, MAP2K7, MAP3K14, NFKBIA, PELI1, PIK3R4, PIK3R5, TAB1, TLR6, TNFAIP3, TNFRSF1A, TNFRSF1B, TRAF6
Sumoylation Pathway	1.92	0.0971	CREBBP, FOS, JUN, NFKBIA, PIAS4, RAC3, RHOB, RHOBTB1, SP1, UBE2I
April Mediated Signaling	1.87	0.154	FOS, JUN, MAP2K7, MAP3K14, NFKBIA, TRAF6
RANK Signaling in Osteoclasts	1.86	0.102	FOS, JUN, MAP2K7, MAP3K11, MAP3K14, NFKBIA, PIK3R4, PIK3R5, TRAF6
B Cell Activating Factor Signaling	1.8	0.146	FOS, JUN, MAP2K7, MAP3K14, NFKBIA, TRAF6
Acute Phase Response Signaling	1.67	0.0726	C4A/C4B, CEBPB, FOS, IL6, JUN, MAP2K7, MAP3K14, NFKBIA, SOCS3, TAB1, TNFRSF1A, TNFRSF1B, TRAF6
Induction of Apoptosis by HIV1	1.67	0.115	BBC3, FADD, MAP2K7, MAP3K14, NFKBIA, TNFRSF1A, TNFRSF1B
Molecular Mechanisms of Cancer	1.67	0.0563	ARHGEF15, ARHGEF16, BBC3, CCNE2, CREBBP, FADD, FOS, FZD4, FZD7, GAB2, JUN, NFKBIA, PIK3R4, PIK3R5, RAC3, RHOB, RHOBTB1, SMAD7, STK36, SUV39H1, SYNGAP1, TAB1
iNOS Signaling	1.67	0.133	CREBBP, FOS, JUN, NFKBIA, TAB1, TRAF6
Sirtuin Signaling Pathway	1.67	0.0619	ADAM10, ATG10, CPT1C, GADD45B, JUN, MT-ATP6, MT-CYB, MT-ND2, MT-ND3, MT-ND4L, MT-ND5, MT-ND6, NDUFA1, SIRT4, SP1, STK11, SUV39H1, TIMM9
IL-17 Signaling	1.65	0.1	CEBPB, IL6, JUN, MAP3K14, PIK3R4, PIK3R5, PTGS2, TRAF6
JAK/Stat Signaling	1.65	0.1	CEBPB, FOS, IL6, JUN, PIAS4, PIK3R4, PIK3R5, SOCS3
Prolactin Signaling	1.63	0.0988	CEBPB, CREBBP, FOS, JUN, PIK3R4, PIK3R5, SOCS3, SP1
NRF2-mediated Oxidative Stress Response	1.53	0.0688	AOX1, CREBBP, DNAJA1, DNAJB1, DNAJB4, DNAJB7, FOS, HSPB8, JUN, JUNB, MAP2K7, PIK3R4, PIK3R5
Myc Mediated Apoptosis Signaling	1.52	0.12	BBC3, CREBBP, FADD, MCL1, TNFRSF1A, TNFRSF1B
ILK Signaling	1.52	0.0684	CREBBP, FLNC, FOS, Irs3, JUN, PIK3R4, PIK3R5, PPP2CA, PTGS2, RAC3, RHOB, RHOBTB1, TNFRSF1A
Role of Macrophages, Fibroblasts and Endothelial Cells in Rheumatoid Arthritis	1.5	0.0577	APC2, CEBPB, CREBBP, FOS, FZD4, FZD7, IL6, JUN, MAP2K7, MAP3K14, NFKBIA, PIK3R4, PIK3R5, SOCS3, TLR6, TNFRSF1A, TNFRSF1B, TRAF6
CD27 Signaling in Lymphocytes	1.44	0.113	FOS, JUN, MAP2K7, MAP3K11, MAP3K14, NFKBIA
Lymphotoxin β Receptor Signaling	1.44	0.113	CREBBP, MAP3K14, NFKBIA, PIK3R4, PIK3R5, TRAF6
Oxidative Phosphorylation	1.44	0.0826	MT-ATP6, MT-CO1, MT-CO3, MT-CYB, MT-ND2, MT-ND3, MT-ND4L, MT-ND5, NDUFA1
Small Cell Lung Cancer Signaling	1.44	0.0986	CCNE2, NFKBIA, PIK3R4, PIK3R5, PTGS2, SUV39H1, TRAF6
HGF Signaling	1.44	0.0811	FOS, IL6, JUN, MAP2K7, MAP3K11, MAP3K14, PIK3R4, PIK3R5, PTGS2
Death Receptor Signaling	1.44	0.0879	FADD, HSPB1, MAP2K7, MAP3K14, NFKBIA, TIPARP, TNFRSF1A, TNFRSF1B
Unfolded protein response	1.37	0.107	CEBPB, HSPA1A/HSPA1B, HSPA8, HSPH1, MAP2K7, SYVN1
Hepatic Cholestasis	1.34	0.0649	CNTF, IL11, IL6, JUN, MAP3K14, MAP4K2, NFKBIA, PPRC1, TNFRSF1A, TNFRSF1B, TNFSF4, TRAF6
Erythropoietin Signaling	1.34	0.0921	EPOR, FOS, JUN, NFKBIA, PIK3R4, PIK3R5, SOCS3
ATM Signaling	1.34	0.0825	BRAT1, CREBBP, GADD45B, JUN, NFKBIA, PPP2CA, RNF168, SUV39H1
Neurotrophin/TRK Signaling	1.34	0.0921	CREBBP, FOS, FRS2, JUN, MAP2K7, PIK3R4, PIK3R5
p38 MAPK Signaling	1.34	0.0763	CREBBP, DUSP1, DUSP10, FADD, HSPB1, TAB1, TNFRSF1A, TNFRSF1B, TRAF6
TGF-β Signaling	1.34	0.0833	CREBBP, FOS, JUN, PIAS4, SMAD7, TAB1, TGIF1, TRAF6
Type II Diabetes Mellitus Signaling	1.3	0.0704	CEBPB, Irs3, MAP2K7, MAP3K14, NFKBIA, PIK3R4, PIK3R5, SOCS3, TNFRSF1A, TNFRSF1B
IL-15 Production	1.28	0.0744	CLK1, CLK2, DYRK3, EPHB3, IL6, LMTK3, MAP2K7, MAP3K11, MST1R
Role of RIG1-like Receptors in Antiviral Innate Immunity	1.25	0.114	CREBBP, DHX58, FADD, NFKBIA, TRAF6
Mitochondrial Dysfunction	1.22	0.0643	CPT1C, MT-ATP6, MT-CO1, MT-CO3, MT-CYB, MT-ND2, MT-ND3, MT-ND4L, MT-ND5, MT-ND6, NDUFA1

## Sheet: Table_S3_Lipidomics_mol%
Table S3. Lipidomic dataset for lipid compositional data (mol% of membrane lipids)
Lipid species	37 °C	40 °C, 1 h	40 °C, 6 h	42.5 °C, 1 h	37 °C	40 °C, 1 h	40 °C, 6 h	42.5 °C, 1 h	p value (compared to 37 °C)
	mean				SEM				40 °C, 1 h	40 °C, 6 h	42.5 °C, 1 h
LPC(16:1)	0.000732023	0.000794782	0.00119484	0.000488764	0.000216011	0.000399373	0.000421123	0.00019355	0.892035	0.344739	0.415722
LPC(16:0)	0.0845837	0.09079	0.117792	0.082736	0.00691666	0.00975293	0.0109708	0.00759255	0.61182	0.0226492	0.859804
LPC(18:1)	0.0485463	0.0502576	0.0657033	0.0451573	0.00723079	0.00733509	0.00782069	0.00471759	0.870416	0.129531	0.700573
LPC(18:0)	0.0294198	0.0336752	0.0417653	0.0294607	0.00261361	0.00385868	0.00185081	0.00205926	0.376664	0.00175066	0.990375
LPC(20:4)	0.00265225	0.00314978	0.00268847	0.0012309	0.000686321	0.00131411	0.000640829	0.000260647	0.74215	0.969773	0.0733175
LPC(22:6)	0.00132529	0.00203392	0.00162551	0.000791561	0.000348582	0.000604853	0.000316927	0.000141707	0.327293	0.534247	0.177944
LPC(22:5)	0.000743922	0.000681691	0.000701388	0.0003576	0.00025175	0.000301571	0.000153925	0.000132952	0.876393	0.88744	0.196276
LPC	0.168003	0.181383	0.231471	0.160223	0.0155144	0.0212332	0.0208944	0.0116469	0.618827	0.0286569	0.694425
PC(28:0)	0.0732955	0.0682392	0.0706404	0.0666278	0.00122159	0.00265971	0.00258437	0.00152655	0.10605	0.368711	0.0042251
PC(30:1)	0.159071	0.152744	0.155036	0.158105	0.00195184	0.00348873	0.00253306	0.00471774	0.135863	0.227722	0.852753
PC(30:0)	0.97128	0.973178	0.98938	0.966764	0.0150581	0.0262488	0.0184794	0.0168377	0.95086	0.460263	0.844441
PC(32:2)	0.243071	0.237445	0.225599	0.251384	0.002616	0.00514248	0.00418436	0.00538276	0.34604	0.00326061	0.186545
PC(32:1)	2.56805	2.56446	2.6799	2.53732	0.022577	0.0252535	0.0161307	0.0396072	0.917059	0.00123866	0.511306
PC(32:0)	2.04952	2.26432	2.23906	2.39096	0.060849	0.065549	0.0356363	0.0525107	0.0307725	0.017669	0.000811158
PC(34:3)	0.295106	0.302669	0.302927	0.316878	0.0048832	0.00921559	0.00261735	0.00531966	0.480305	0.179907	0.00927127
PC(34:2)	2.94917	2.93604	3.1148	2.84154	0.0288607	0.0295805	0.0248441	0.0443128	0.75544	0.000666897	0.061211
PC(34:1)	12.6912	12.9573	13.8445	12.924	0.101941	0.116821	0.144197	0.144658	0.108091	1.33277e-05	0.209543
PC(34:0)	0.266038	0.300529	0.290959	0.283737	0.0107053	0.0106451	0.00717007	0.00861248	0.0384574	0.0735669	0.21858
PC(36:6)	0.0948799	0.0943137	0.0732174	0.0857228	0.00235697	0.00431716	0.00237001	0.00259512	0.90999	1.44666e-05	0.0204898
PC(36:5)	0.466773	0.439594	0.399163	0.39872	0.0103355	0.00917533	0.00395989	0.00928779	0.0693785	2.70297e-05	0.000235406
PC(36:4)	2.894	2.84733	2.48738	2.66359	0.0600379	0.0745646	0.0306827	0.0535333	0.633451	3.08717e-05	0.0124885
PC(36:3)	1.72122	1.705	1.68404	1.53663	0.0170961	0.0213994	0.0116237	0.0316199	0.563138	0.0937344	0.000151561
PC(36:2)	5.85151	5.86769	6.03756	5.55984	0.115316	0.0683362	0.0948352	0.100128	0.905613	0.233161	0.076861
PC(36:1)	1.94232	1.96991	2.17189	1.89211	0.0279665	0.0230655	0.0506231	0.028437	0.459242	0.00139717	0.228687
PC(36:0)	0.0111609	0.0139079	0.0131126	0.0107128	0.000740165	0.00115599	0.000889967	0.00159446	0.0651435	0.113928	0.802505
PC(38:6)	1.46766	1.46033	1.32201	1.25627	0.017195	0.0368925	0.0346874	0.0236915	0.859584	0.00210238	4.41612e-06
PC(38:5)	2.4378	2.43421	1.95302	2.23108	0.04591	0.0745619	0.0498623	0.0517207	0.967851	4.91681e-06	0.0097591
PC(38:4)	1.65736	1.68529	1.35852	1.58824	0.0419661	0.0567749	0.0421031	0.0448766	0.698338	0.000184999	0.279569
PC(38:3)	0.567926	0.578211	0.551664	0.527451	0.00622185	0.00987501	0.0065194	0.00559528	0.393102	0.0926992	0.00026356
PC(38:2)	0.611268	0.614542	0.655657	0.574174	0.0188582	0.01457	0.0163771	0.0176325	0.892691	0.0972624	0.172749
PC(38:1)	0.11189	0.121975	0.134378	0.116227	0.00388933	0.00184265	0.00320259	0.00414548	0.0343922	0.000535287	0.45807
PC(40:7)	0.604524	0.599877	0.548068	0.488492	0.00798136	0.0140759	0.0189608	0.00956525	0.778146	0.0158214	2.23583e-07
PC(40:6)	0.778339	0.77049	0.687737	0.650589	0.00860674	0.0179582	0.0216693	0.0128478	0.699406	0.001647	9.40563e-07
PC(40:5)	0.656377	0.666611	0.555432	0.591662	0.0195229	0.024019	0.0234503	0.0171276	0.745821	0.00517671	0.025872
PC(40:4)	0.268069	0.276826	0.231051	0.253822	0.0141115	0.0161212	0.0126786	0.0109508	0.688931	0.0713174	0.438413
PC(40:3)	0.0647684	0.0681864	0.0638553	0.0615176	0.00176252	0.00173236	0.00231678	0.00192919	0.188309	0.758398	0.233911
PC(40:2)	0.0679269	0.0707459	0.0781203	0.063819	0.00278377	0.000686767	0.00213516	0.00260135	0.342212	0.0115163	0.299174
PC(40:1)	0.0360265	0.0367086	0.0437007	0.0329846	0.00190221	0.00109196	0.00145354	0.00229799	0.760412	0.00634958	0.325161
PC(42:7)	0.0892747	0.0903288	0.0773829	0.073914	0.00131669	0.00260373	0.00302025	0.00239041	0.723279	0.00284561	6.22311e-05
PC(42:6)	0.0581212	0.0597382	0.0491567	0.0356026	0.00344473	0.00187631	0.00477646	0.00420009	0.686405	0.150214	0.000990196
PC(42:5)	0.079811	0.0833496	0.065963	0.0700999	0.00429911	0.0052535	0.0049092	0.00414957	0.610325	0.052151	0.126396
PC(42:4)	0.0196658	0.0218722	0.0195349	0.014789	0.00223616	0.00257848	0.0031077	0.00268148	0.528443	0.973192	0.184232
PC(42:2)	0.0114796	0.0132647	0.0211736	0.00661073	0.00141199	0.00102206	0.00170364	0.00202905	0.323165	0.000627329	0.0689947
PC(42:1)	0.0175585	0.0183854	0.0334442	0.0167805	0.00259939	0.00115115	0.00270762	0.0027049	0.775419	0.000836331	0.838694
PC	44.8535	45.3656	45.229	43.5387	0.245157	0.460968	0.301905	0.480431	0.34328	0.350678	0.0287188
PC(O-28:0)	0.00710419	0.00577118	0.00568292	0.00558504	0.000708474	0.000786563	0.000800837	0.000644084	0.228537	0.205026	0.134926
PC(O-30:1)	0.00646923	0.00629867	0.0102985	0.00588965	0.00115291	0.000698211	0.00102186	0.000529637	0.901101	0.0261853	0.654811
PC(O-30:0)	0.0569446	0.057526	0.0729717	0.0535775	0.00233629	0.00252125	0.00258762	0.00154158	0.868096	0.00041465	0.248951
PC(O-32:1)	0.254835	0.250241	0.290962	0.263984	0.0123077	0.00832691	0.00607329	0.00719591	0.761783	0.0196992	0.531436
PC(O-32:0)	0.188262	0.202377	0.287513	0.212127	0.00688913	0.0121118	0.0132427	0.00992496	0.328238	1.09809e-05	0.0682829
PC(O-34:5)	0.0206465	0.0244302	0.0188197	0.0159801	0.00295217	0.00348973	0.00368397	0.00242093	0.421685	0.704608	0.241795
PC(O-34:4)	0.0216714	0.0275031	0.0234523	0.0225799	0.00248815	0.00167567	0.00153815	0.00384163	0.0722654	0.552394	0.845518
PC(O-34:3)	0.0216289	0.0256252	0.0383105	0.0213769	0.00307831	0.00225986	0.00255413	0.00342449	0.313067	0.000943244	0.957126
PC(O-34:2)	0.278209	0.288466	0.341944	0.30383	0.018514	0.00969117	0.0103366	0.00971132	0.631158	0.00944317	0.240611
PC(O-34:1)	1.75483	1.81938	2.17175	1.94086	0.0616019	0.0561779	0.0579728	0.0534182	0.451694	0.000222109	0.038676
PC(O-34:0)	0.0745604	0.0876857	0.131536	0.0887046	0.00359974	0.00597603	0.005572	0.00529829	0.0808803	5.93429e-07	0.0444166
PC(O-36:6)	0.0495832	0.0537028	0.0468757	0.0582223	0.00518796	0.00465768	0.00448145	0.00486154	0.564016	0.698846	0.244427
PC(O-36:5)	0.201744	0.218648	0.196959	0.236315	0.015764	0.0107049	0.00965906	0.00853452	0.390011	0.799534	0.0743153
PC(O-36:4)	1.00278	1.02726	0.951368	1.10428	0.0256553	0.0191208	0.0133114	0.0202785	0.456916	0.0969825	0.00777396
PC(O-36:3)	0.239266	0.247238	0.286199	0.254965	0.0121216	0.00799539	0.0061181	0.00785971	0.59164	0.0038542	0.295536
PC(O-36:2)	0.41454	0.432766	0.502023	0.462353	0.0269345	0.020494	0.0175238	0.018141	0.598682	0.0165122	0.163054
PC(O-36:1)	0.228814	0.236253	0.328738	0.231219	0.015556	0.0170392	0.0161951	0.0151479	0.751892	0.000549628	0.913381
PC(O-38:6)	0.658067	0.700739	0.715171	0.722411	0.0205668	0.0109627	0.0180441	0.0101967	0.088475	0.055644	0.0140988
PC(O-38:5)	1.17363	1.21887	1.0686	1.29804	0.0229984	0.0201478	0.0264242	0.0195261	0.161139	0.00958569	0.001033
PC(O-38:4)	0.516114	0.545466	0.508773	0.570467	0.00775165	0.0124401	0.0117798	0.00809808	0.0649888	0.610825	0.00025792
PC(O-38:3)	0.0937958	0.100316	0.106926	0.100972	0.00253988	0.00163666	0.00111874	0.00204997	0.0488026	0.00032171	0.0452053
PC(O-38:2)	0.0496126	0.0536344	0.0669722	0.0521321	0.0038088	0.00274305	0.00237463	0.00417167	0.405966	0.00170713	0.662403
PC(O-38:1)	0.0317684	0.0353557	0.0540828	0.0305991	0.00294323	0.00336359	0.0017986	0.00401559	0.435608	1.47483e-05	0.817711
PC(O-40:6)	0.406906	0.425851	0.386953	0.443973	0.00894711	0.00654907	0.0106289	0.0057018	0.109581	0.172942	0.00357895
PC(O-40:5)	0.270055	0.288546	0.249574	0.298834	0.00734418	0.00976081	0.0108179	0.00776714	0.152319	0.139575	0.0175201
PC(O-40:4)	0.104103	0.108113	0.0983068	0.110189	0.00450218	0.00390695	0.00559837	0.00479869	0.512086	0.433304	0.370615
PC(O-40:3)	0.0161226	0.0177053	0.0247709	0.0168171	0.00197997	0.00147387	0.00248655	0.00202686	0.53175	0.0165663	0.809933
PC(O-40:2)	0.00435399	0.00459162	0.00907856	0.00293407	0.000995886	0.000976543	0.00140502	0.000974543	0.867159	0.0158496	0.32547
PC(O-40:1)	0.00155217	0.00281093	0.00669763	0.00210991	0.000422119	0.000554681	0.00138321	0.000672045	0.0924758	0.00315074	0.493706
PC(O-42:6)	0.0151889	0.0177637	0.0154728	0.0142738	0.00193386	0.00124426	0.00377048	0.00298988	0.28169	0.947539	0.800925
PC(O-42:5)	0.0166903	0.0216977	0.0143254	0.0179776	0.00173569	0.0024464	0.00239184	0.00244532	0.117241	0.436945	0.674231
PC-O	8.17985	8.55263	9.03111	8.96358	0.234938	0.105726	0.108237	0.14281	0.169929	0.00535862	0.0128347
LPE(16:0)	0.0165295	0.0172072	0.0209334	0.0157838	0.00156898	0.00164655	0.00230057	0.00219912	0.770132	0.13609	0.786528
LPE(18:1)	0.0363332	0.0331411	0.039762	0.0343143	0.00213794	0.00236864	0.00371025	0.00244648	0.334098	0.436661	0.544342
LPE(18:0)	0.0472586	0.0490645	0.0653277	0.0453641	0.00345472	0.00421913	0.00658304	0.00488437	0.745424	0.0291179	0.756167
LPE(20:4)	0.0109973	0.00915854	0.00920602	0.00805763	0.00106387	0.000919041	0.00158026	0.00111421	0.211973	0.363007	0.0770873
LPE(20:1)	0.00817282	0.00888715	0.0122473	0.00652157	0.000976054	0.00144803	0.0016902	0.00101515	0.688684	0.0555956	0.260546
LPE(20:0)	0.00317445	0.00320606	0.00449621	0.00250694	0.000724403	0.000524114	0.000451817	0.000535809	0.9723	0.143883	0.471041
LPE(22:6)	0.0140767	0.0112576	0.0131325	0.0122104	0.00127731	0.000989347	0.00219655	0.00133813	0.102905	0.715747	0.330167
LPE(22:5)	0.00935921	0.00761789	0.00808876	0.00918775	0.00106172	0.000743619	0.00150599	0.00115333	0.200526	0.501792	0.914457
LPE(22:4)	0.00709768	0.00540945	0.00539192	0.0070161	0.00148077	0.000751855	0.000993163	0.00135338	0.326603	0.354955	0.968133
LPE	0.152999	0.144949	0.178586	0.140963	0.0097845	0.0101608	0.0186564	0.0143813	0.577258	0.244625	0.500251
PE(32:1)	0.0676661	0.0641074	0.066523	0.0621255	0.00168481	0.00130844	0.00203546	0.00189709	0.11747	0.671885	0.0464964
PE(32:0)	0.0476042	0.0491159	0.0536126	0.0502501	0.00259036	0.00117826	0.0011106	0.00214909	0.60359	0.0512163	0.444897
PE(34:2)	0.100513	0.0904066	0.0900829	0.0869932	0.004971	0.0112269	0.00207818	0.00406144	0.424243	0.0733465	0.0537185
PE(34:1)	0.729746	0.727896	0.804779	0.671477	0.0110817	0.0175928	0.0193096	0.0158253	0.930344	0.00457623	0.00925214
PE(34:0)	0.0549799	0.0612782	0.0663976	0.0656832	0.00455264	0.00224377	0.00284341	0.00232912	0.235028	0.0516684	0.0550401
PE(36:4)	0.2635	0.244622	0.225622	0.227392	0.00669582	0.00759262	0.00401942	0.00567877	0.0833017	0.000257138	0.00105552
PE(36:3)	0.155517	0.149225	0.147286	0.142464	0.00388481	0.00343032	0.00323626	0.00364646	0.244834	0.12583	0.0280574
PE(36:2)	1.0509	1.00612	1.01988	0.972312	0.0231835	0.0251359	0.0267925	0.0281798	0.211434	0.396102	0.0491933
PE(36:1)	1.10747	1.11282	1.16994	1.05047	0.0138793	0.0343283	0.0304148	0.0301064	0.887148	0.0827453	0.10753
PE(38:7)	0.0506024	0.0433694	0.0563754	0.0591105	0.00602397	0.00486456	0.0130971	0.00820566	0.36606	0.694865	0.417301
PE(38:6)	0.405782	0.379952	0.339225	0.354646	0.0137222	0.00550413	0.00613976	0.00939797	0.102512	0.000573758	0.00823732
PE(38:5)	0.714374	0.658652	0.57083	0.630075	0.0281271	0.0133948	0.0127812	0.0168934	0.0953288	0.000377791	0.0222683
PE(38:4)	1.2211	1.15901	1.00652	1.11083	0.0510725	0.0316492	0.023202	0.0358015	0.318979	0.00185607	0.0988379
PE(38:3)	0.215396	0.211829	0.209534	0.19636	0.00542073	0.00364766	0.00452353	0.0034614	0.593753	0.420353	0.0103454
PE(38:2)	0.173247	0.162302	0.17433	0.162049	0.00418559	0.00419611	0.00360719	0.00481869	0.0860551	0.847426	0.101217
PE(38:1)	0.0577661	0.0588918	0.0636543	0.0578994	0.000731759	0.00226046	0.00184709	0.00241579	0.642971	0.0102637	0.958625
PE(40:7)	0.378366	0.354432	0.306056	0.3745	0.0159748	0.00931227	0.00494465	0.0133036	0.216484	0.000700075	0.855142
PE(40:6)	0.855198	0.81559	0.774416	0.749939	0.0324567	0.0189337	0.0173199	0.0223774	0.309694	0.0454527	0.0183007
PE(40:5)	0.733094	0.708785	0.651632	0.684799	0.0377525	0.0330631	0.0261666	0.03175	0.635583	0.0978978	0.344168
PE(40:4)	0.258733	0.250097	0.227355	0.249562	0.0198634	0.0177416	0.0154726	0.0176242	0.750518	0.233136	0.73494
PE(40:3)	0.0315125	0.0309087	0.0275275	0.0290212	0.0012274	0.00164896	0.00234819	0.00195063	0.773284	0.154808	0.297976
PE(40:2)	0.0311485	0.0314739	0.0307525	0.0311963	0.000836723	0.00130603	0.00122701	0.00130187	0.836853	0.793643	0.975763
PE(40:1)	0.0157268	0.0173324	0.0170766	0.0134668	0.00104876	0.00102073	0.00153348	0.0014112	0.291114	0.479497	0.219502
PE(42:7)	0.0324154	0.0298384	0.0341583	0.0285675	0.00166559	0.0020594	0.00249885	0.00192124	0.34709	0.57088	0.152443
PE(42:6)	0.0308224	0.0260959	0.0232943	0.0245552	0.00232935	0.00123997	0.00201885	0.00104722	0.0949122	0.028467	0.0278327
PE(42:5)	0.0175268	0.013466	0.00356651	0.0152916	0.00555818	0.00565778	0.00231638	0.00451829	0.616623	0.0360685	0.759593
PE(42:4)	0.0200152	0.0182279	0.0129615	0.0165291	0.00169429	0.00229145	0.00233663	0.00221466	0.540653	0.0283763	0.231725
PE(42:3)	0.00164569	0.0014581	0.00151005	0.00133578	0.000232674	0.000238041	0.000451715	0.000313889	0.581963	0.793406	0.44091
PE(42:2)	0.0206395	0.0224319	0.0197246	0.0193935	0.000946651	0.00109335	0.00157264	0.00129019	0.235575	0.625935	0.44916
PE(42:1)	0.0224263	0.0243747	0.0254374	0.0217545	0.000887015	0.00131672	0.00170111	0.00155112	0.239965	0.138845	0.712592
PE	8.86543	8.52411	8.22006	8.16004	0.217231	0.132694	0.0962213	0.180199	0.201317	0.0167125	0.0255043
PE(P-32:1)	0.0129307	0.0131483	0.0147061	0.0107599	0.0017178	0.00173903	0.00114494	0.00112971	0.930314	0.40426	0.308926
PE(P-32:0)	0.0278938	0.0261392	0.0403629	0.0343928	0.0056852	0.00574583	0.0118089	0.00690903	0.831284	0.357547	0.479595
PE(P-34:2)	0.0288369	0.0286575	0.0319478	0.0285946	0.0016771	0.00233709	0.00182385	0.00248696	0.951147	0.229825	0.936772
PE(P-34:1)	0.332126	0.331695	0.398751	0.327613	0.020917	0.0278299	0.021168	0.022936	0.990294	0.041929	0.88648
PE(P-34:0)	0.0277939	0.0301713	0.0458792	0.0408746	0.00102476	0.00169375	0.00118156	0.00141747	0.249697	1.50308e-08	2.97406e-06
PE(P-36:5)	0.0148791	0.0155781	0.0209848	0.0115292	0.0038051	0.00573641	0.00289377	0.00351738	0.920566	0.222302	0.528422
PE(P-36:4)	0.687719	0.63921	0.647988	0.638234	0.0283965	0.0230917	0.0168234	0.0305566	0.206272	0.248638	0.255251
PE(P-36:3)	0.0809739	0.0798994	0.0855865	0.0860514	0.00437192	0.00445625	0.00379464	0.00396025	0.865806	0.438886	0.403873
PE(P-36:2)	0.183547	0.176167	0.205549	0.18273	0.00774207	0.0113612	0.00866571	0.0106518	0.599822	0.0791657	0.9514
PE(P-36:1)	0.209218	0.214335	0.275258	0.222147	0.0150323	0.0206133	0.0162365	0.0180093	0.843929	0.00984728	0.590228
PE(P-36:0)	0.0498192	0.0513727	0.0716076	0.0580256	0.00236359	0.00297314	0.00263419	0.00266873	0.688718	2.49149e-05	0.0372099
PE(P-38:6)	0.871673	0.84201	0.843808	0.879437	0.0288009	0.0174405	0.0170319	0.0168031	0.393193	0.418945	0.819246
PE(P-38:5)	0.98814	0.92015	0.878657	0.984783	0.026541	0.0139358	0.0155827	0.0264693	0.0396795	0.00315514	0.92991
PE(P-38:4)	0.840365	0.80811	0.778559	0.855836	0.0286915	0.0147608	0.0183203	0.0252266	0.334448	0.0909062	0.691618
PE(P-38:2)	0.063062	0.0616817	0.0752537	0.0681343	0.00231061	0.0034668	0.00248113	0.00347189	0.745328	0.00292195	0.244003
PE(P-38:1)	0.0532361	0.0554024	0.0754896	0.0582292	0.0030207	0.00370901	0.00357057	0.0030756	0.65758	0.000305718	0.266141
PE(P-38:0)	0.00740987	0.00953338	0.0186846	0.00989986	0.00140246	0.00145565	0.00110091	0.000903498	0.311264	1.87933e-05	0.157748
PE(P-40:7)	0.433842	0.407933	0.342627	0.455714	0.0186839	0.00909794	0.00896137	0.00826114	0.232943	0.00060262	0.302446
PE(P-40:6)	0.697695	0.68251	0.612267	0.72794	0.0145467	0.0091466	0.0105968	0.0143879	0.391772	0.000312354	0.161495
PE(P-40:5)	0.58254	0.568476	0.492944	0.625105	0.019636	0.0101756	0.0133845	0.0143522	0.535087	0.00206875	0.101981
PE(P-40:4)	0.25791	0.261246	0.233317	0.290166	0.00894822	0.00510498	0.00861027	0.00818031	0.750841	0.0676586	0.0186408
PE(P-40:3)	0.0431857	0.0438066	0.04253	0.0496612	0.000632732	0.000732307	0.000990677	0.00118675	0.531555	0.585787	0.000274755
PE(P-40:2)	0.0107222	0.0111865	0.014464	0.0112791	0.000967649	0.00124196	0.000710146	0.000603047	0.772364	0.00756448	0.632759
PE(P-40:1)	0.00234719	0.00318303	0.00628115	0.00279818	0.000647241	0.000783914	0.000705971	0.000404229	0.424742	0.00106654	0.563936
PE(P-42:6)	0.0251034	0.0258327	0.0231236	0.0273603	0.00115718	0.00118303	0.00126626	0.00118398	0.666177	0.267754	0.194338
PE(P-42:5)	0.0336641	0.0323605	0.0301057	0.0354875	0.00183213	0.00137057	0.00133636	0.00197668	0.577885	0.138931	0.50972
PE(P-42:4)	0.0169275	0.0171336	0.0148403	0.0173391	0.00102272	0.00106349	0.00170409	0.00150894	0.890898	0.311409	0.824629
PE-P	6.58356	6.35693	6.32157	6.74012	0.147639	0.128288	0.101549	0.174175	0.265957	0.165805	0.504108
LPI(16:0)	0.00977852	0.0117046	0.0221985	0.0125918	0.00028626	0.000559956	0.000568841	0.00110449	0.00843474	1.5115e-11	0.0272108
LPI(18:2)	0.00127717	0.00150689	0.00224189	0.000917965	0.000418214	0.000450671	0.000578141	0.000203803	0.714276	0.197814	0.452886
LPI(18:1)	0.0378649	0.0373847	0.0470056	0.040652	0.00144722	0.00206961	0.00411345	0.00335919	0.851929	0.0547159	0.458706
LPI(18:0)	0.0624426	0.0740078	0.123023	0.101314	0.00236411	0.00292087	0.00514476	0.0102928	0.00818687	4.0174e-08	0.00246999
LPI(20:4)	0.0440121	0.0426899	0.0462112	0.0391273	0.0064757	0.00718771	0.00848968	0.0064131	0.893245	0.839788	0.600394
LPI(20:3)	0.00778528	0.00780042	0.00848568	0.00569323	0.00130697	0.00151453	0.00186948	0.00108471	0.99407	0.763322	0.238338
LPI(22:6)	0.00101563	0.000759006	0.00134846	0.000318948	0.000437197	0.000270396	0.000367568	0.000111119	0.625383	0.569354	0.144787
LPI(22:5)	0.00292716	0.00254071	0.00328332	0.00220592	0.000622357	0.000627557	0.000786714	0.000720301	0.668604	0.727841	0.461214
LPI(22:4)	0.00131858	0.00125192	0.00119868	0.000624181	0.000286661	0.000309866	0.000290225	0.000218268	0.876778	0.773129	0.0744845
LPI	0.168422	0.179646	0.254996	0.203445	0.0117509	0.0147893	0.014271	0.0216594	0.561858	0.000352242	0.177121
PI(32:1)	0.0179014	0.0185723	0.0278285	0.0187986	0.000662067	0.000930843	0.00104599	0.00061085	0.56636	1.33172e-06	0.336201
PI(34:2)	0.074587	0.0752971	0.0921038	0.0728076	0.00222437	0.00213776	0.00340252	0.00228736	0.821286	0.000720778	0.585857
PI(34:1)	0.31267	0.336224	0.520295	0.316544	0.0120308	0.0193196	0.0261758	0.0127687	0.31825	4.51448e-06	0.828406
PI(36:4)	0.589374	0.592648	0.595988	0.576749	0.0103362	0.0066806	0.010952	0.0102705	0.794082	0.667211	0.400869
PI(36:3)	0.151075	0.153364	0.168225	0.133069	0.00201477	0.00390389	0.00473125	0.00329524	0.6105	0.00490818	0.00036674
PI(36:2)	0.464011	0.455492	0.556235	0.422228	0.0133155	0.0162584	0.0223531	0.00978088	0.691333	0.00323567	0.0240776
PI(36:1)	0.267905	0.282283	0.428299	0.349006	0.00835584	0.0120686	0.0152218	0.0103172	0.34395	2.47372e-07	2.70237e-05
PI(38:6)	0.0976882	0.0957459	0.102005	0.0836956	0.00386391	0.00442433	0.00380511	0.00319951	0.745794	0.43934	0.0144837
PI(38:5)	0.484612	0.476423	0.423582	0.438224	0.0123667	0.00624789	0.0074376	0.00668409	0.563925	0.000841593	0.0052629
PI(38:4)	4.08876	4.04043	3.61244	4.18876	0.119586	0.0780367	0.0756883	0.0876677	0.740035	0.00461838	0.511021
PI(38:3)	0.425625	0.42783	0.44995	0.432489	0.00754316	0.0128663	0.0139591	0.0185093	0.884566	0.147537	0.736361
PI(38:2)	0.0397368	0.0393584	0.0595835	0.0330666	0.00160943	0.00219486	0.00209275	0.00181474	0.891423	2.80323e-06	0.0156482
PI(40:7)	0.018927	0.0199393	0.0146238	0.0184014	0.000671366	0.00227557	0.000831384	0.00238552	0.676118	0.00124831	0.835064
PI(40:6)	0.179737	0.17587	0.16526	0.179339	0.00258253	0.00373734	0.00211066	0.00384937	0.409024	0.00067819	0.932851
PI(40:5)	0.337065	0.329584	0.294048	0.341189	0.00892986	0.00802856	0.00489881	0.00856111	0.543309	0.000850853	0.743799
PI(40:4)	0.215239	0.210702	0.178361	0.223168	0.0128532	0.0101349	0.00713766	0.010327	0.785708	0.0250609	0.637994
PI(40:3)	0.01855	0.0204492	0.0181602	0.0222181	0.000625452	0.00173736	0.000305086	0.00224948	0.321135	0.584298	0.138492
PI	7.78346	7.75021	7.70699	7.84976	0.151835	0.124778	0.108639	0.139634	0.868067	0.688287	0.75267
LPS(18:1)	0.00897948	0.00927779	0.00852416	0.0103623	0.000718971	0.000426937	0.000854624	0.000840145	0.726599	0.689665	0.231601
LPS(18:0)	0.00383948	0.00320635	0.00540533	0.00603579	0.000523599	0.000217305	0.000972087	0.00116773	0.282865	0.178015	0.108158
LPS(20:0)	0.000781606	0.000795233	0.000363674	0.00082471	0.000221963	0.000266622	0.000138026	0.000258453	0.969223	0.132149	0.901119
LPS(22:1)	0.00115271	0.000708949	0.000268661	0.00132098	0.000317595	0.000259176	0.000148635	0.000286541	0.297303	0.0244465	0.699964
LPS(22:0)	0.00575725	0.00544186	0.00304012	0.00669455	0.00115489	0.000907507	0.000467835	0.000698309	0.833077	0.0467687	0.49873
LPS(24:1)	0.00246985	0.00248572	0.00149813	0.00287634	0.000750207	0.000588195	0.000295652	0.000457789	0.986953	0.248155	0.650813
LPS	0.0229804	0.0219159	0.0191001	0.0281147	0.00309026	0.00174065	0.00193524	0.00304746	0.76849	0.305249	0.256517
PS(32:1)	0.0309087	0.0283254	0.0284562	0.0288296	0.00113937	0.00100303	0.000842411	0.000752608	0.110878	0.105449	0.150122
PS(32:0)	0.0405276	0.0450342	0.0447224	0.0485875	0.00230868	0.00184382	0.00207599	0.00143366	0.149455	0.198102	0.0102205
PS(34:2)	0.0341563	0.030316	0.0306728	0.033938	0.00145591	0.00224519	0.00188355	0.00189091	0.173215	0.165488	0.928412
PS(34:1)	0.601985	0.575714	0.598491	0.607193	0.0154188	0.021062	0.013787	0.0161909	0.331294	0.868304	0.819174
PS(34:0)	0.0535386	0.0668568	0.0642595	0.0706639	0.0036335	0.00393951	0.00586574	0.00479047	0.0262111	0.142548	0.0128942
PS(36:4)	0.0224842	0.0195439	0.0152575	0.0248996	0.00102373	0.00220771	0.000670927	0.00137428	0.246975	3.84052e-05	0.180507
PS(36:3)	0.0420745	0.037328	0.0366164	0.0415445	0.00146925	0.00177391	0.00105026	0.00144632	0.0584198	0.0091414	0.800882
PS(36:2)	0.450697	0.420014	0.419544	0.461812	0.0132059	0.0170919	0.014156	0.0148958	0.17733	0.129883	0.585428
PS(36:1)	2.06481	2.03167	2.08894	2.11075	0.0418298	0.0824704	0.0519333	0.0632014	0.725384	0.722867	0.554112
PS(38:6)	0.0583103	0.0486896	0.0421568	0.0588715	0.00161758	0.00176132	0.00135382	0.00283421	0.00125795	2.2687e-06	0.865911
PS(38:5)	0.0949253	0.0831442	0.0619656	0.0892833	0.00189939	0.00226217	0.00141821	0.00190276	0.00134625	1.38224e-09	0.0544807
PS(38:4)	0.196045	0.177355	0.137731	0.218452	0.00426244	0.00668611	0.00266258	0.00603038	0.0335061	1.43843e-08	0.00892463
PS(38:3)	0.284671	0.272136	0.276509	0.284557	0.00594624	0.00739102	0.0041797	0.00481207	0.207532	0.280313	0.988306
PS(38:2)	0.100756	0.100358	0.10652	0.104963	0.00214813	0.00398175	0.00224233	0.00257509	0.931172	0.0845719	0.230174
PS(38:1)	0.128877	0.135136	0.137831	0.134938	0.00590682	0.00854281	0.00500728	0.0068968	0.556403	0.266902	0.515337
PS(38:0)	0.0490009	0.0656087	0.0395155	0.0588993	0.0136859	0.021285	0.00559063	0.0203447	0.522273	0.531494	0.692537
PS(40:7)	0.0328932	0.0270606	0.0237865	0.0381858	0.000949008	0.00245722	0.000970059	0.00178066	0.0439109	9.93361e-06	0.0200564
PS(40:6)	0.770422	0.715582	0.748019	0.792692	0.018934	0.0249268	0.0108264	0.0179085	0.101648	0.321768	0.407197
PS(40:5)	1.007	0.945116	0.898632	0.983623	0.0429389	0.0289335	0.0281808	0.0272744	0.251901	0.0533512	0.652962
PS(40:4)	0.63398	0.614205	0.590569	0.634623	0.0465573	0.0308443	0.0362366	0.0375768	0.728553	0.473997	0.991574
PS(40:3)	0.0676061	0.0667074	0.06315	0.0677454	0.00209373	0.00426858	0.00199097	0.00344365	0.852796	0.145293	0.972918
PS(40:2)	0.0940002	0.0920659	0.0855929	0.100015	0.00177455	0.00492438	0.00231532	0.00383039	0.71726	0.0120625	0.176147
PS(40:1)	0.11709	0.123985	0.122673	0.118234	0.00729423	0.0113466	0.00364495	0.00864307	0.617206	0.504688	0.920844
PS(42:4)	0.0372403	0.0378872	0.0303742	0.0382464	0.00226148	0.00403668	0.00211001	0.00305795	0.890802	0.0434484	0.795225
PS(42:3)	0.0259684	0.0280327	0.0228225	0.0281071	0.00135265	0.0031175	0.00107938	0.00272944	0.55328	0.0905399	0.49414
PS(42:2)	0.0902275	0.0914307	0.0942724	0.0875525	0.00198763	0.0034474	0.00201726	0.00182206	0.766828	0.175129	0.338
PS(42:1)	0.117116	0.121364	0.142493	0.11911	0.00631754	0.00581985	0.00527089	0.00505472	0.6286	0.00807927	0.808899
PS	7.2473	7.00066	6.95157	7.38632	0.128828	0.219689	0.0940955	0.108562	0.34925	0.0849647	0.423129
LPG(16:0)	0.000454505	0.00143265	0.000975602	0.000128338	8.7067e-05	0.000979313	0.000129861	4.60523e-05	0.336678	0.00492838	0.00514356
LPG(18:1)	0.00841505	0.00799607	0.00940328	0.0085494	0.000724009	0.000830007	0.0012283	0.000455692	0.70935	0.499582	0.877458
LPG(22:6)	0.00327551	0.00277387	0.00156352	0.0030268	0.000304323	0.000315502	0.000348308	0.000319629	0.271657	0.00237077	0.581973
LPG	0.0121451	0.0122026	0.0119424	0.0117045	0.00109535	0.00157286	0.00165958	0.000685989	0.976484	0.920263	0.738269
PG(32:0)	0.0100698	0.010069	0.013884	0.0076341	0.000338407	0.000810294	0.000520384	0.00051675	0.999328	2.54217e-05	0.00147138
PG(34:3)	0.00182948	0.00203221	0.00158804	0.00123595	0.000307712	0.000294773	0.000152747	0.000200083	0.641585	0.493702	0.128166
PG(34:2)	0.0329094	0.0316871	0.0362807	0.0312014	0.0012669	0.00160772	0.00119348	0.00141689	0.559937	0.0731949	0.384044
PG(34:1)	0.197106	0.198369	0.241572	0.12956	0.00576991	0.00679017	0.00684535	0.0060832	0.889273	0.000206904	1.26208e-06
PG(36:4)	0.00879824	0.00848279	0.00796664	0.00741364	0.000323988	0.000413104	0.00023292	0.000325966	0.557535	0.0559544	0.00931431
PG(36:3)	0.0374573	0.0367855	0.0391299	0.038942	0.00187802	0.00248131	0.00191434	0.00270979	0.832173	0.542851	0.659378
PG(36:2)	0.146766	0.14434	0.1795	0.138806	0.0103037	0.0132787	0.00985573	0.0109595	0.88727	0.0376511	0.604951
PG(36:1)	0.112217	0.108799	0.124694	0.0900888	0.00278703	0.00479191	0.00365178	0.00377777	0.547405	0.0167244	0.000332538
PG(38:7)	0.0105018	0.00913068	0.00708988	0.0083797	0.000250399	0.000373004	0.000355724	0.00022688	0.00861489	1.72283e-06	2.02068e-05
PG(38:6)	0.0191225	0.0175465	0.015	0.0182674	0.00110905	0.00114669	0.000976017	0.00171151	0.339951	0.0144503	0.681378
PG(38:5)	0.018495	0.0179993	0.00964701	0.0250296	0.00131041	0.00151897	0.00175909	0.00213215	0.808438	0.001232	0.0205294
PG(38:4)	0.014162	0.0143027	0.00953049	0.0155084	0.00161191	0.00126385	0.00140358	0.00155997	0.946192	0.0479792	0.557943
PG(38:2)	0.0113492	0.0115303	0.0126998	0.0107094	0.000677026	0.000984295	0.000749498	0.000907256	0.881694	0.202496	0.580898
PG(40:8)	0.0201137	0.0202461	0.013773	0.0207683	0.000492987	0.000956593	0.000562474	0.00130104	0.903816	6.92825e-07	0.645264
PG(40:7)	0.16439	0.154958	0.129212	0.156119	0.00630753	0.00928599	0.00698494	0.0122067	0.414893	0.00220577	0.556833
PG(40:6)	0.0388414	0.0371125	0.0281413	0.0383035	0.002259	0.00298801	0.0020025	0.00383556	0.651497	0.00323609	0.905543
PG(40:5)	0.0101423	0.00979444	0.00676781	0.010462	0.000493087	0.000625954	0.000603778	0.000640972	0.669085	0.000693776	0.698523
PG(42:10)	0.0116169	0.0113245	0.00369574	0.0145155	0.000764025	0.000729216	0.000579974	0.00143456	0.785925	9.4472e-07	0.096206
PG(42:9)	0.0111574	0.0106144	0.00393491	0.0123956	0.000810322	0.000807632	0.000318621	0.00136535	0.642376	8.96279e-07	0.448445
PG(42:8)	0.00729975	0.00703627	0.00327291	0.007507	0.000406595	0.000472497	0.000373538	0.000716812	0.678947	3.95053e-06	0.80509
PG(44:12)	0.0558337	0.0502484	0.0238615	0.04538	0.00267348	0.00245527	0.00201927	0.00378287	0.146161	1.66234e-07	0.0405354
PG(44:11)	0.0203185	0.0184561	0.00489687	0.0177775	0.00154506	0.00118557	0.000782303	0.00203059	0.355157	3.85118e-07	0.336227
PG(44:10)	0.00489475	0.00452622	0.00118262	0.00494162	0.000518042	0.000552298	0.000285391	0.000832313	0.634016	2.03477e-05	0.962541
PG	0.965392	0.935391	0.91732	0.850946	0.0269655	0.0437736	0.0303036	0.0441614	0.568811	0.25571	0.0441121
PA(32:1)	0.0130231	0.00943994	0.00849222	0.0113531	0.00187175	0.00164286	0.000777252	0.00286473	0.1722	0.0421844	0.633079
PA(32:0)	0.0278097	0.0242722	0.0347343	0.0238974	0.00398214	0.00268289	0.00323515	0.00342229	0.473443	0.198551	0.468532
PA(34:2)	0.0128567	0.0116615	0.00767817	0.0137187	0.00115306	0.00231333	0.000690289	0.0020156	0.650908	0.00175584	0.716029
PA(34:1)	0.0624231	0.0538737	0.0556055	0.0674351	0.00642732	0.0065066	0.00364303	0.00836418	0.36574	0.371741	0.642018
PA(34:0)	0.00835076	0.00620809	0.0107639	0.00472186	0.00300882	0.00108494	0.00123538	0.000856088	0.513813	0.47041	0.265431
PA(36:4)	0.00108773	0.0015961	0.000511043	0.00122893	0.000196207	0.000683124	8.34485e-05	0.000377652	0.486203	0.0170975	0.744977
PA(36:3)	0.00226524	0.00425836	0.00241577	0.0037871	0.000247608	0.00186149	0.000865091	0.000503287	0.306492	0.86954	0.0168146
PA(36:2)	0.0266767	0.025298	0.021292	0.0350951	0.00225069	0.0035741	0.00118864	0.0028969	0.748938	0.0527886	0.0377196
PA(36:1)	0.020799	0.0209465	0.0221993	0.0314586	0.00145166	0.00112058	0.000735004	0.00183828	0.937051	0.403966	0.000453023
PA(38:6)	0.00152223	0.00100884	0.000408859	0.00219554	0.000157624	0.000414091	0.000158382	0.00101121	0.265962	0.000200887	0.521272
PA(38:5)	0.00182087	0.0012857	0.000452389	0.00201323	0.000286519	0.000387094	0.00012529	0.000587331	0.285189	0.000633288	0.7728
PA(38:4)	0.00496781	0.00414237	0.00223331	0.00973319	0.000520709	0.000802699	0.000602144	0.00311624	0.402834	0.0040226	0.153712
PA	0.183603	0.163991	0.166787	0.206638	0.0185602	0.0194696	0.0102516	0.0208367	0.477964	0.440951	0.422937
CL(66:5)	0.00131525	0.00190237	0.000980814	0.00246648	0.000381169	0.000783907	0.000324263	0.000701557	0.511562	0.514811	0.17133
CL(66:4)	0.00416121	0.00426729	0.00323702	0.00374828	0.000585018	0.000402557	0.000271283	0.000385607	0.88339	0.173761	0.565023
CL(66:3)	0.00530017	0.0049465	0.00561855	0.00525944	0.000342437	0.000356207	0.000285667	0.000572431	0.485903	0.487002	0.952169
CL(66:2)	0.00781321	0.00860979	0.0118342	0.00759165	0.0002184	0.000468336	0.000546423	0.000644708	0.145489	8.1511e-06	0.749623
CL(66:1)	0.000475987	0.000872215	0.00319298	0.000508541	8.33365e-05	0.000168263	0.000264067	0.000121928	0.0533177	1.18109e-07	0.828718
CL(68:6)	0.00426666	0.00346208	0.00253938	0.00398147	0.000603736	0.000513355	0.000314078	0.000539844	0.327211	0.0236583	0.72999
CL(68:5)	0.0222702	0.0205569	0.017566	0.0215971	0.00110185	0.00104034	0.000973156	0.00114978	0.277232	0.00642103	0.678955
CL(68:4)	0.0362872	0.034173	0.0318977	0.035392	0.00124794	0.00119914	0.00091542	0.00114954	0.242024	0.0132041	0.606008
CL(68:3)	0.0411142	0.0407266	0.0490623	0.0426205	0.00183643	0.0014516	0.00117872	0.00150212	0.870845	0.00266526	0.53573
CL(68:2)	0.0755096	0.0818462	0.126269	0.0802005	0.00458823	0.00402908	0.00328742	0.00315747	0.316989	3.42054e-07	0.413824
CL(70:7)	0.0129604	0.0113901	0.00927423	0.0117384	0.000953462	0.000450486	0.000506595	0.000548249	0.158639	0.00419335	0.285268
CL(70:6)	0.0577956	0.0532462	0.0464604	0.0562406	0.00298185	0.00150789	0.00174337	0.00189616	0.194862	0.00545775	0.666615
CL(70:5)	0.131679	0.123088	0.113524	0.126691	0.00498435	0.00316622	0.00360888	0.00454927	0.167772	0.0105413	0.472043
CL(70:4)	0.128969	0.124948	0.13116	0.127608	0.0046458	0.00325116	0.00268885	0.00377647	0.48992	0.689301	0.823387
CL(70:3)	0.0480409	0.0488627	0.0567162	0.0481208	0.00185718	0.00190997	0.000999245	0.00164606	0.762257	0.00105382	0.974765
CL(70:2)	0.00606166	0.00714573	0.0122222	0.00615641	0.000514351	0.00062521	0.000566501	0.000440527	0.2019	1.27121e-06	0.890733
CL(72:9)	0.00423689	0.00387823	0.00288155	0.00368569	0.000598105	0.000342205	0.000349917	0.000352692	0.610849	0.0707311	0.440541
CL(72:8)	0.0244166	0.0226285	0.0189664	0.0232545	0.00160775	0.000433531	0.000512391	0.000504888	0.301062	0.0060498	0.501711
CL(72:7)	0.0819614	0.0765466	0.0669361	0.0796239	0.00403374	0.00140671	0.00176234	0.00176347	0.225646	0.00419981	0.603763
CL(72:6)	0.195798	0.181436	0.165314	0.186	0.00789483	0.00280376	0.00325927	0.00431074	0.108511	0.00308176	0.294401
CL(72:5)	0.132658	0.124341	0.112898	0.128655	0.00373118	0.00357333	0.00228947	0.00398138	0.129721	0.000486026	0.475303
CL(72:4)	0.0325286	0.0305904	0.0291557	0.0310292	0.000834287	0.00118231	0.000586939	0.00117092	0.201761	0.00519376	0.314668
CL(72:3)	0.00182035	0.00193557	0.00283737	0.00153749	0.000232558	0.000217975	0.000248715	0.000178958	0.723143	0.00980431	0.351435
CL(74:10)	0.00931709	0.00832145	0.00672554	0.00895968	0.00077927	0.000533133	0.000334774	0.000321746	0.309516	0.00855451	0.678051
CL(74:9)	0.0323903	0.0287628	0.0252004	0.0295527	0.00217834	0.000974856	0.000892144	0.00129625	0.150775	0.00857491	0.281784
CL(74:8)	0.0468845	0.0433902	0.0375049	0.044747	0.00267896	0.00121101	0.000888774	0.00167927	0.25438	0.00502562	0.510015
CL(74:7)	0.0472974	0.0436369	0.0385508	0.044786	0.00227156	0.00140563	0.000909763	0.00184669	0.192163	0.00304913	0.4054
CL(74:6)	0.0219538	0.021084	0.0188181	0.0216399	0.000763593	0.000812303	0.000331178	0.000691215	0.448256	0.00208037	0.765004
CL(74:5)	0.00543417	0.00549251	0.00433648	0.00559186	0.000402782	0.00038541	0.000304985	0.000225074	0.918138	0.0474651	0.737606
CL(76:11)	0.00772207	0.00738984	0.00618061	0.00724358	0.000643402	0.000345551	0.000485784	0.00054572	0.65615	0.0765589	0.579592
CL(76:10)	0.0158166	0.0145323	0.0125794	0.0150699	0.00109754	0.000849927	0.000473755	0.000844002	0.370556	0.0169897	0.598143
CL(76:9)	0.012836	0.0117614	0.00994281	0.0122787	0.000960317	0.000727112	0.000490583	0.00085437	0.387405	0.0178422	0.671182
CL(76:8)	0.00570018	0.00538242	0.00428508	0.00546663	0.000650913	0.00036945	0.000361526	0.000556444	0.677608	0.0781505	0.789038
CL	1.26279	1.20115	1.18467	1.22904	0.0428391	0.025539	0.0202477	0.0278648	0.236836	0.121444	0.5197
SM(32:1:2)	0.238548	0.236942	0.23045	0.254132	0.00480855	0.00355279	0.00402783	0.00611649	0.792166	0.217642	0.0649214
SM(33:1:2)	0.250803	0.255951	0.249221	0.265036	0.00481646	0.00440002	0.00435742	0.00468775	0.443179	0.811093	0.0525838
SM(34:2:2)	0.468267	0.468213	0.467252	0.491838	0.0178014	0.0115471	0.0118253	0.00623328	0.998004	0.962795	0.231879
SM(34:1:2)	6.20113	6.2596	6.30509	6.7593	0.0690217	0.0765221	0.0791422	0.0712288	0.579443	0.338968	6.23375e-05
SM(34:0:2)	0.0815038	0.0870177	0.0743651	0.0987545	0.00382476	0.00270602	0.00488895	0.00429225	0.25887	0.269392	0.00954046
SM(36:1:2)	0.0518718	0.0578729	0.0614435	0.051211	0.0020848	0.00170954	0.00162529	0.00245767	0.0429626	0.00278092	0.840498
SM(40:2:2)	0.147956	0.152911	0.150795	0.153256	0.00421584	0.00543971	0.00264148	0.00522306	0.483354	0.577301	0.44294
SM(40:1:2)	0.23996	0.244733	0.242254	0.241582	0.00394103	0.00673897	0.00599491	0.00723404	0.550794	0.753878	0.846796
SM(41:2:2)	0.0941827	0.0973423	0.0930826	0.0946926	0.00310882	0.00282951	0.0041458	0.00356294	0.464729	0.834931	0.91566
SM(41:1:2)	0.0743495	0.0787273	0.0770334	0.0697499	0.00130093	0.0038817	0.00214738	0.00418907	0.303006	0.303168	0.312132
SM(42:3:2)	0.412653	0.430406	0.410169	0.433519	0.0109564	0.0182555	0.01557	0.0129097	0.418386	0.898071	0.238131
SM(42:2:2)	1.20998	1.24273	1.23288	1.27832	0.0202992	0.037147	0.0339632	0.0327759	0.452001	0.571966	0.0980602
SM(42:1:2)	0.415072	0.421191	0.426907	0.454632	0.00906559	0.00757733	0.0174896	0.0224071	0.612636	0.557582	0.123979
SM	9.88628	10.0336	10.0209	10.646	0.133755	0.15233	0.142832	0.150509	0.479259	0.502568	0.00205699
Cer(34:2:2)	0.00932432	0.00749874	0.00922158	0.00977105	0.000361613	0.0002581	0.000354968	0.000579678	0.00106306	0.842251	0.523793
Cer(34:1:2)	0.096765	0.0901034	0.104939	0.142233	0.00351745	0.00152229	0.00238149	0.00301739	0.104128	0.0748954	1.18253e-07
Cer(34:0:2)	0.0031641	0.00227483	0.00163051	0.00338103	0.000918687	0.000211879	9.30435e-05	0.000998445	0.361561	0.118968	0.875258
Cer(36:1:2)	0.00493645	0.00212923	0.00267945	0.00311854	0.0017076	0.000394534	0.000302327	0.0007403	0.131523	0.214097	0.345264
Cer(38:1:2)	0.00260909	0.000438982	0.000900273	0.00152096	0.00139759	0.000183894	0.000279829	0.000552105	0.145981	0.250471	0.480918
Cer(38:0:2)	0.00261583	0.00115755	0.00283391	0.00223902	0.00145473	0.000318603	0.00139216	0.00077869	0.344085	0.915292	0.822663
Cer(39:1:2)	0.00475679	0.00217274	0.00418632	0.00349285	0.00145378	0.000639457	0.00128448	0.000819086	0.126021	0.773024	0.461331
Cer(40:2:2)	0.00551321	0.0050777	0.00746635	0.00601627	0.000294401	0.000387103	0.00042022	0.000411197	0.385653	0.00192539	0.336755
Cer(40:1:2)	0.0183104	0.0162181	0.0201114	0.0241797	0.00227081	0.000334781	0.000758518	0.00270646	0.377442	0.464361	0.118871
Cer(41:2:2)	0.00385354	0.00368703	0.0061358	0.00430544	0.000338835	0.000212609	0.000397229	0.000378592	0.683548	0.000639281	0.388789
Cer(41:1:2)	0.00955757	0.00782541	0.0102593	0.0107035	0.00215388	0.00044266	0.000723752	0.00263938	0.443983	0.761991	0.741571
Cer(42:3:2)	0.0183481	0.0179733	0.0239485	0.0218903	0.000616338	0.000541126	0.000868785	0.000515528	0.654702	0.00012117	0.000595225
Cer(42:2:2)	0.0648509	0.0725731	0.089897	0.0897551	0.00165423	0.00207229	0.00183643	0.00171938	0.0113628	7.92482e-08	5.48003e-08
Cer(42:1:2)	0.0575381	0.05927	0.0761837	0.0675177	0.00432046	0.00178756	0.00219682	0.00867451	0.716622	0.0017783	0.320569
Cer	0.302143	0.2884	0.360393	0.390124	0.0167601	0.00524836	0.00659737	0.019218	0.446936	0.00600124	0.00390257
HexCer(33:1:2)	0.00364824	0.00327877	0.00527372	0.00394055	0.000707348	0.000718383	0.00146761	0.000626299	0.719486	0.335343	0.761581
HexCer(34:1:2)	0.154776	0.156356	0.145206	0.202721	0.00628569	0.00623689	0.00383102	0.00466462	0.860954	0.214558	2.62733e-05
HexCer(36:2:2)	0.00927151	0.00959152	0.00901066	0.00952197	0.00253331	0.0020463	0.00294681	0.0018629	0.923112	0.947433	0.937642
HexCer(36:1:2)	0.000732345	0.000828762	0.00117691	0.00100883	0.000110662	0.000251298	0.0001859	0.000186606	0.730715	0.0590461	0.223271
HexCer(38:1:2)	0.00705891	0.00956039	0.00554051	0.00848468	0.00210432	0.0030637	0.00149711	0.00316547	0.511888	0.565932	0.713211
HexCer(39:1:2)	0.00878979	0.0167521	0.00514053	0.0093716	0.00316282	0.0071445	0.00108244	0.00483639	0.325457	0.293422	0.921232
HexCer(40:2:2)	0.00378601	0.00462777	0.00281269	0.00572021	0.000831747	0.00158153	0.000415238	0.00205975	0.644848	0.312844	0.398584
HexCer(40:1:2)	0.0256386	0.0262507	0.0250442	0.0320933	0.00203262	0.00202598	0.000917941	0.00123136	0.834169	0.793738	0.0167225
HexCer(41:2:2)	0.00106331	0.00154882	0.000846374	0.00289802	0.000332447	0.000920176	0.000221236	0.00189501	0.627426	0.595506	0.356456
HexCer(40:2:3)	0.0101434	0.0142431	0.00600321	0.0103397	0.00321773	0.00477493	0.00126576	0.00497026	0.488151	0.251048	0.974016
HexCer(41:1:2)	0.00453764	0.00451577	0.00551173	0.00564561	0.000879815	0.000907694	0.000613083	0.000795622	0.98644	0.379056	0.366113
HexCer(42:3:2)	0.00188636	0.00180187	0.00191031	0.00241808	0.000279896	0.000262226	0.00037479	0.000491536	0.828817	0.959887	0.363142
HexCer(42:2:2)	0.0486406	0.0494766	0.0454125	0.0609915	0.001782	0.00160339	0.000894032	0.00194064	0.732463	0.127716	0.000349174
HexCer(41:2:3)	0.0112974	0.0194221	0.00874156	0.0133518	0.00335422	0.00691698	0.00171407	0.00594421	0.30846	0.508499	0.76785
HexCer(42:1:2)	0.0359409	0.0366108	0.0389099	0.0409566	0.00230415	0.00208381	0.00102146	0.000961389	0.832404	0.258443	0.0642318
HexCer	0.327211	0.354865	0.306541	0.409463	0.0132762	0.0299224	0.0103048	0.023054	0.412445	0.238989	0.00796149
LacCer(34:1:2)	0.132205	0.122939	0.107343	0.133878	0.0153356	0.0149487	0.0128576	0.0178869	0.671855	0.234519	0.944414
LacCer(42:3:2)	0.0161041	0.0169329	0.0236644	0.0237276	0.00608735	0.0052047	0.0062904	0.00809977	0.919049	0.402316	0.464276
LacCer(42:2:2)	0.128931	0.126125	0.149562	0.162961	0.0237038	0.0239582	0.0268929	0.0344366	0.934806	0.574089	0.429283
LacCer(42:1:2)	0.00674768	0.0117903	0.00795939	0.0060118	0.00189135	0.00427919	0.00353847	0.00144543	0.299334	0.767089	0.761771
LacCer	0.283988	0.277787	0.288529	0.326578	0.0410211	0.0329552	0.0392618	0.0591839	0.90786	0.937401	0.563656
GM3(34:2:2)	0.0582587	0.0522311	0.0471435	0.0520833	0.00306592	0.00330504	0.0023149	0.00334488	0.202528	0.0117974	0.195022
GM3(34:1:2)	1.50532	1.43044	1.38817	1.49197	0.0515489	0.0512321	0.0388091	0.0510702	0.320296	0.0909057	0.856578
GM3(34:1:3)	0.0656713	0.0645399	0.060773	0.0610055	0.00220355	0.00163758	0.00196741	0.00153699	0.686509	0.119513	0.10439
GM3(40:2:2)	0.0331238	0.0270562	0.0289487	0.0287042	0.00223406	0.00365565	0.00247005	0.00416543	0.178565	0.23052	0.365627
GM3(40:1:2)	0.140539	0.141032	0.144275	0.147165	0.00598275	0.00520877	0.00402945	0.00594071	0.951278	0.61257	0.445033
GM3(41:2:2)	0.0184624	0.0182753	0.0153056	0.016089	0.0020198	0.00226148	0.00222362	0.00310619	0.951665	0.311113	0.532134
GM3(41:1:2)	0.0203691	0.0176823	0.0304096	0.0161927	0.00181123	0.00469797	0.00322033	0.00495734	0.601972	0.0166747	0.44196
GM3(42:2:2)	0.481604	0.471222	0.466898	0.503048	0.0123702	0.0153068	0.00981419	0.0137792	0.6061	0.367485	0.266227
GM3(42:1:2)	0.269761	0.272202	0.282744	0.284742	0.0118886	0.0152975	0.0124337	0.0123855	0.901532	0.462948	0.397613
GM3	2.59311	2.49468	2.46467	2.60099	0.070327	0.0869309	0.0461627	0.0722714	0.393545	0.149077	0.938816
DG(32:1)	0.0279854	0.0142943	0.0262382	0.0156623	0.00754548	0.00247618	0.00428452	0.00354735	0.106704	0.843313	0.161552
DG(32:0)	0.236803	0.230664	0.256964	0.191912	0.00965005	0.00842579	0.0164031	0.00934011	0.63918	0.307373	0.00483435
DG(34:1)	0.401233	0.312443	0.382783	0.251857	0.0453232	0.0122369	0.0217334	0.023331	0.0794537	0.719069	0.0109643
DG(36:4)	0.00508154	0.00387012	0.00464268	0.0109588	0.00178451	0.00151162	0.00132371	0.00288432	0.612552	0.846261	0.105087
DG(36:3)	0.00747549	0.00630197	0.00719656	0.00548282	0.00233168	0.0014769	0.00180911	0.00185735	0.67717	0.926041	0.514717
DG(36:2)	0.153837	0.126176	0.167261	0.104887	0.0247569	0.00967158	0.0266682	0.0122915	0.315663	0.717698	0.0983254
DG(38:4)	0.0434262	0.0399838	0.0543363	0.0527173	0.00927901	0.00716166	0.0082397	0.0134051	0.773302	0.394144	0.577785
DG(38:3)	0.0123475	0.00938607	0.0326741	0.00628336	0.00613045	0.0032151	0.0271536	0.00168868	0.675297	0.477312	0.356429
DG	0.888189	0.743119	0.932096	0.63976	0.0805836	0.0276448	0.0676081	0.0576143	0.110689	0.682703	0.0250841
TG(48:1)	0.0369654	0.0378801	0.0523768	0.0516275	0.00207596	0.00302094	0.00628547	0.0085301	0.806554	0.0354024	0.117092
TG(50:2)	0.0503365	0.0552341	0.0741104	0.082303	0.00410219	0.00435002	0.00373241	0.00867942	0.426452	0.000752774	0.00495898
TG(50:1)	0.0845047	0.0879368	0.129873	0.0972004	0.00387596	0.00558562	0.00868083	0.0105954	0.621544	0.000297752	0.279385
TG(52:4)	0.0138043	0.016568	0.0272514	0.0362612	0.00305858	0.00299864	0.0051583	0.0053035	0.529223	0.0416512	0.00253251
TG(52:3)	0.052947	0.0551697	0.0749543	0.0897206	0.00502162	0.00251186	0.00418182	0.00736487	0.698173	0.00459931	0.00102976
TG(52:2)	0.13346	0.137165	0.188152	0.184593	0.0103966	0.00304245	0.00723701	0.0145573	0.737415	0.000709096	0.0126394
TG(52:1)	0.0677195	0.057433	0.083032	0.0619514	0.00719423	0.00227765	0.00539223	0.00955151	0.19436	0.110627	0.636995
TG(54:6)	0.0143477	0.0191111	0.0362273	0.0426362	0.00357495	0.00490925	0.00845276	0.00821577	0.445899	0.0318282	0.00699016
TG(54:5)	0.0930838	0.0685595	0.0964852	0.110787	0.01751	0.0130996	0.0223406	0.0211368	0.280951	0.906317	0.529375
TG(54:4)	0.0380353	0.0414928	0.0593057	0.0737936	0.00428256	0.0047894	0.00966729	0.00892573	0.598933	0.063911	0.00283048
TG(54:3)	0.0776135	0.0810287	0.103431	0.118729	0.00605758	0.00375618	0.00704496	0.0110715	0.639232	0.0147875	0.00572205
TG(54:2)	0.05117	0.0547874	0.0719758	0.0614868	0.00334227	0.00221023	0.0036785	0.00655478	0.381914	0.000914788	0.182643
TG(54:1)	0.0483485	0.0284689	0.0393525	0.0356272	0.0105237	0.00228325	0.00518084	0.0133177	0.0861298	0.45586	0.465984
TG(56:7)	0.0137151	0.0173495	0.0138807	0.0235656	0.000647915	0.00197748	0.000890046	0.00156272	0.102612	0.882585	4.42361e-05
TG(56:6)	0.0168813	0.0214378	0.0166584	0.0305306	0.000941543	0.00162469	0.00123222	0.00184557	0.0293391	0.887726	1.2132e-05
TG(56:5)	0.0231452	0.0256609	0.0219403	0.0270832	0.00314891	0.00214056	0.001981	0.0025687	0.519516	0.750813	0.348955
TG(56:4)	0.0108732	0.013937	0.0154625	0.0151629	0.000986288	0.00149697	0.00079545	0.00206537	0.109507	0.00277536	0.0819172
TG(56:3)	0.013041	0.0136816	0.0198908	0.017326	0.00125031	0.00167298	0.00103263	0.00279541	0.763592	0.000849903	0.183497
TG(56:2)	0.0179352	0.0161499	0.023066	0.0168421	0.00285125	0.00151607	0.00363405	0.0051545	0.589086	0.285369	0.855448
TG(58:8)	0.00198156	0.00492156	0.00232107	0.0053251	0.000279147	0.00118074	0.000587621	0.000993416	0.0295279	0.609914	0.00592699
TG(58:7)	0.00845225	0.0129497	0.00889898	0.0132338	0.000675562	0.00178595	0.00115758	0.00178101	0.033619	0.743841	0.024968
TG(58:6)	0.00791257	0.0119322	0.00995063	0.0135071	0.000780707	0.00129182	0.00114019	0.00122355	0.0185502	0.162379	0.00175171
TG(58:5)	0.0041081	0.00632477	0.00491881	0.00542718	0.000499076	0.00127352	0.000966389	0.00098929	0.127404	0.468375	0.253663
TG(58:4)	0.00106804	0.00117999	0.00178529	0.000644709	0.000182459	0.000109636	0.000617971	0.000232357	0.607155	0.284392	0.173837
TG(58:3)	0.001327	0.00189654	0.00402616	0.00224914	0.000432842	0.000354438	0.000715759	0.000568825	0.325923	0.00608607	0.21792
TG(58:2)	0.0031428	0.00280275	0.0065908	0.00335225	0.00083754	0.000418884	0.00163062	0.00150626	0.721934	0.0809453	0.905
TG	0.88592	0.891059	1.18592	1.22097	0.0597676	0.0294509	0.0792626	0.121596	0.939608	0.0091437	0.0268371
CE(16:1)	0.0625634	0.0780016	0.117091	0.0458084	0.0151895	0.0217347	0.03052	0.010782	0.56968	0.132034	0.383603
CE(16:0)	0.140926	0.15714	0.213138	0.0860259	0.0243542	0.0426155	0.0399346	0.0188935	0.74603	0.144929	0.0965951
CE(18:2)	0.0768548	0.104026	0.0966782	0.0692624	0.0159076	0.026633	0.0130715	0.0146687	0.395885	0.351981	0.730905
CE(18:1)	1.09002	1.19061	1.37357	1.13176	0.192997	0.285149	0.214094	0.207817	0.774476	0.341946	0.885108
CE(18:0)	0.0311794	0.0403806	0.0720859	0.0158452	0.00715342	0.0138501	0.0194502	0.00401399	0.56442	0.0684652	0.0826247
CE(20:4)	0.0929656	0.108737	0.0692988	0.0905666	0.0193759	0.0257061	0.00749236	0.021242	0.631774	0.273717	0.934686
CE(20:3)	0.113587	0.138963	0.0916392	0.135081	0.0235021	0.0346073	0.00907778	0.0326751	0.553833	0.398363	0.601716
CE(20:2)	0.0174873	0.0286691	0.0201876	0.0137596	0.0032032	0.0077487	0.00292379	0.00377091	0.203629	0.543541	0.463686
CE(20:1)	0.0630176	0.0817859	0.0999659	0.0548135	0.0151188	0.0247664	0.0176037	0.0144827	0.528213	0.133647	0.701064
CE(22:6)	0.303723	0.3043	0.279215	0.326242	0.0571103	0.0618846	0.0361219	0.0621382	0.994625	0.722263	0.793495
CE(22:5)	0.258691	0.26172	0.171143	0.250738	0.0444534	0.0606712	0.0183099	0.0493473	0.968441	0.0900419	0.906383
CE(22:4)	0.0873434	0.0974443	0.0461286	0.0842924	0.0193461	0.0247389	0.00726229	0.0214894	0.752485	0.0659463	0.917461
CE	2.33836	2.59177	2.65015	2.30419	0.412859	0.619456	0.38932	0.441499	0.738599	0.591367	0.95572
GPC	0.113932	0.0874598	0.17257	0.189465	0.0118093	0.00443445	0.02829	0.0135026	0.0544753	0.076453	0.00087216
PCho	0.16937	0.13652	0.175938	0.169713	0.0142743	0.00593473	0.0164106	0.0084316	0.0518759	0.767112	0.983795
Carn	0.00906713	0.00795877	0.0173828	0.025558	0.00149411	0.00152665	0.00562721	0.0015464	0.611961	0.175142	2.23116e-06
AcCar(16:0)	0.0129062	0.0128366	0.00904057	0.0565072	0.00219077	0.00380948	0.00320857	0.00617945	0.987591	0.33664	1.09568e-05
AcCar(18:1)	0.000895209	0.00259509	0.00302451	0.0339279	0.000349373	0.00103112	0.00179872	0.00874383	0.14075	0.264635	0.00205031
AcCar(18:0)	0.120131	0.160483	0.143664	0.106486	0.0298882	0.0369209	0.0485143	0.00943202	0.409908	0.685865	0.66993
AcCar	0.133932	0.175914	0.155729	0.196921	0.0322522	0.0404681	0.0528693	0.0197304	0.430781	0.730109	0.117924
Lipid classes
LPC	0.168003	0.181383	0.231471	0.160223	0.0155144	0.0212332	0.0208944	0.0116469	0.618827	0.0286569	0.694425
PC	44.8535	45.3656	45.229	43.5387	0.245157	0.460968	0.301905	0.480431	0.34328	0.350678	0.0287188
PC-O	8.17985	8.55263	9.03111	8.96358	0.234938	0.105726	0.108237	0.14281	0.169929	0.00535862	0.0128347
LPE	0.152999	0.144949	0.178586	0.140963	0.0097845	0.0101608	0.0186564	0.0143813	0.577258	0.244625	0.500251
PE	8.86543	8.52411	8.22006	8.16004	0.217231	0.132694	0.0962213	0.180199	0.201317	0.0167125	0.0255043
PE-P	6.58356	6.35693	6.32157	6.74012	0.147639	0.128288	0.101549	0.174175	0.265957	0.165805	0.504108
LPI	0.168422	0.179646	0.254996	0.203445	0.0117509	0.0147893	0.014271	0.0216594	0.561858	0.000352242	0.177121
PI	7.78346	7.75021	7.70699	7.84976	0.151835	0.124778	0.108639	0.139634	0.868067	0.688287	0.75267
LPS	0.0229804	0.0219159	0.0191001	0.0281147	0.00309026	0.00174065	0.00193524	0.00304746	0.76849	0.305249	0.256517
PS	7.2473	7.00066	6.95157	7.38632	0.128828	0.219689	0.0940955	0.108562	0.34925	0.0849647	0.423129
LPG	0.0121451	0.0122026	0.0119424	0.0117045	0.00109535	0.00157286	0.00165958	0.000685989	0.976484	0.920263	0.738269
PG	0.965392	0.935391	0.91732	0.850946	0.0269655	0.0437736	0.0303036	0.0441614	0.568811	0.25571	0.0441121
PA	0.183603	0.163991	0.166787	0.206638	0.0185602	0.0194696	0.0102516	0.0208367	0.477964	0.440951	0.422937
CL	1.26279	1.20115	1.18467	1.22904	0.0428391	0.025539	0.0202477	0.0278648	0.236836	0.121444	0.5197
SM	9.88628	10.0336	10.0209	10.646	0.133755	0.15233	0.142832	0.150509	0.479259	0.502568	0.00205699
Cer	0.302143	0.2884	0.360393	0.390124	0.0167601	0.00524836	0.00659737	0.019218	0.446936	0.00600124	0.00390257
HexCer	0.327211	0.354865	0.306541	0.409463	0.0132762	0.0299224	0.0103048	0.023054	0.412445	0.238989	0.00796149
LacCer	0.283988	0.277787	0.288529	0.326578	0.0410211	0.0329552	0.0392618	0.0591839	0.90786	0.937401	0.563656
GM3	2.59311	2.49468	2.46467	2.60099	0.070327	0.0869309	0.0461627	0.0722714	0.393545	0.149077	0.938816
DG	0.888189	0.743119	0.932096	0.63976	0.0805836	0.0276448	0.0676081	0.0576143	0.110689	0.682703	0.0250841
TG	0.88592	0.891059	1.18592	1.22097	0.0597676	0.0294509	0.0792626	0.121596	0.939608	0.0091437	0.0268371
CE	2.33836	2.59177	2.65015	2.30419	0.412859	0.619456	0.38932	0.441499	0.738599	0.591367	0.95572
GPC	0.113932	0.0874598	0.17257	0.189465	0.0118093	0.00443445	0.02829	0.0135026	0.0544753	0.076453	0.00087216
PCho	0.16937	0.13652	0.175938	0.169713	0.0142743	0.00593473	0.0164106	0.0084316	0.0518759	0.767112	0.983795
Carn	0.00906713	0.00795877	0.0173828	0.025558	0.00149411	0.00152665	0.00562721	0.0015464	0.611961	0.175142	2.23116e-06
AcCar	0.133932	0.175914	0.155729	0.196921	0.0322522	0.0404681	0.0528693	0.0197304	0.430781	0.730109	0.117924
Lysolipids	0.52455	0.540097	0.696095	0.54445	0.0380591	0.0448459	0.0536987	0.049326	0.795389	0.0207198	0.754136
Double bonds (db)
db = 0	4.84599	5.22062	5.44677	5.43944	0.106726	0.145645	0.0667006	0.103525	0.0569194	0.000296926	0.00133864
db = 1	31.2771	31.7062	34.7615	32.0009	0.388498	0.357593	0.447723	0.286346	0.430033	4.01809e-05	0.155906
db = 2	16.208	16.1115	17.0504	15.8041	0.277608	0.210215	0.235996	0.237128	0.785717	0.0365115	0.287207
db = 3	5.43952	5.44718	5.50141	5.25171	0.0389426	0.0216855	0.0232748	0.0505917	0.865982	0.194013	0.010723
db = 4	18.7364	18.4983	16.5694	18.7253	0.373993	0.330523	0.304353	0.320646	0.640727	0.000504925	0.982361
db = 5	12.2394	12.0225	10.4883	11.9906	0.196482	0.215481	0.236019	0.191436	0.469265	5.4637e-05	0.379776
db = 6	8.95393	8.79718	8.2967	8.60788	0.0782475	0.090562	0.138579	0.0612983	0.211377	0.00102102	0.00366823
db = 7	2.14462	2.05189	1.8209	2.0328	0.0321538	0.0214964	0.0271002	0.0269184	0.03102	2.13601e-06	0.0184229
db = 8	0.0323812	0.0322242	0.0201679	0.0337802	0.000952457	0.00153368	0.000909788	0.00238225	0.931955	2.36102e-07	0.59413
db = 9	0.01318	0.0125358	0.00465652	0.0148085	0.000957902	0.000947303	0.000380288	0.00162792	0.639887	9.28323e-07	0.403118
db = 10	0.0195069	0.0187213	0.00577845	0.0232455	0.00129513	0.0013952	0.000882741	0.00236507	0.686073	4.69505e-07	0.187281
db = 11	0.0240023	0.0217972	0.00579542	0.0212434	0.00182652	0.0013875	0.000926899	0.00242684	0.352695	3.93455e-07	0.379087
db = 12	0.065963	0.0593522	0.0282457	0.054214	0.00319509	0.00287735	0.00241894	0.00450203	0.146458	1.96886e-07	0.0515629
DBI	2.86519	2.83033	2.67276	2.81616	0.0209123	0.0220705	0.0246093	0.0186732	0.2708	3.49574e-05	0.102203
db ≤ 1	36.1231	36.9268	40.2083	37.4403	0.373755	0.439934	0.469888	0.314835	0.185556	8.54186e-06	0.0174103
db ≥ 4	42.2294	41.5145	37.2399	41.5039	0.664022	0.630008	0.69498	0.580385	0.44781	0.000136864	0.424503
Membrane lipids include all measured lipids except DG, TG, CE, GPC, PCho, Carn and AcCar.
Data are expressed as mean ± SEM, n = 8.
Student’s t-tests were performed for pairwise multiple comparisons; significance was accepted for p < 0.025 corresponding to a false discovery rate q < 0.05. Green fill indicates p < 0.025.
PC and PC-O, diacyl and alkyl-acyl phosphatidylcholine; PE and PE-P, diacyl and alkenyl-acyl phosphatidylethanolamine; PI, phosphatidylinositol; PS, phosphatidylserine; PG, phosphatidylglycerol; PA, phosphatidic acid; CL, cardiolipin; LPC, LPE, LPI, LPS, LPG, the corresponding lysolipids;
SM, sphingomyelin; Cer, ceramide; HexCer, hexosylceramide; LacCer, lactosylceramide; GM3, GM3 ganglioside.
DG, diacylglycerol; TG, triacylglycerol; CE, cholesteryl ester; GPC, glycerophosphocholine; PCho, phosphocholine; Carn, carnitine; AcCar, acylcarnitine.
Sum formulas for glycero(phospho)lipids are defined as the lipid class abbreviation followed by the total number of carbons and total number of double bonds for all chains, e.g. PC(34:1).
Sum formulas for sphingolipids are defined as the lipid class abbreviation followed by the total number of carbons, total number of double bonds and total number of hydroxyl groups in the long chain base and the fatty acyl moiety, e.g. Cer(34:1:2).
db, number of double bonds; DBI, double bond index.
DBI was calculated for diacylated GPLs as Σ(db x [GPLi])/Σ[GPLi], where db is the total number of double bonds in fatty acyls in a given GPL species, and the square bracket indicates mol% of GPLs.

## Sheet: Table_S4_Lipid_quant
Table S4. Mass spectrometry quantitation details for lipidomics
Lipid Class	Internal standard (IS)	Ion format	Conc of infusion (fmol/μL)
PC, PC-O, LPC, GPC, PCho	PC(D31-16:0/18:1)	[M+H]+	411.514
PE, PE-P, LPE	PE(D31-16:0/18:1)	[M−H]−	144.885
PI, LPI	PI(D31-16:0/18:1)	[M−H]−	62.4955
PS, LPS	PS(D31-16:0/18:1)	[M−H]−	109.468
PG, LPG	PG(D31-16:0/18:1)	[M−H]−	13.9118
PA	PA(D31-16:0/18:1)	[M−H]−	5.12449
CL	CL(tetra14:0)	[M−2H]2−	8.7306
Cer	Cer(d18:1/17:0)	[M+Cl]−	30.2361
SM	SM(d18:1/17:0)	[M+H]+	9.8212
HexCer	GluCer(d18:1/12:0)	[M+Cl]−	16.835
LacCer	LacCer(d18:1/17:0)	[M+Cl]−	20.62
GM3	GM3(d18:1/D3-18:0)	[M−H]−	38.1317
DG	DG(15:0/D7-18:1)	[M+NH4]+	30.7302
TG	TG(15:0/D7-18:1/15:0)	[M+NH4]+	111.212
CE	Chol(D7) 18:1 ester	[M+NH4]+	137.275
Carn	Carnitine D9	[M+H]+	82.3333
AcCar	Acetyl carnitine D3	[M+H]+	20.5833
PC and PC-O, diacyl and alkyl-acyl phosphatidylcholine; PE and PE-P, diacyl and alkenyl-acyl phosphatidylethanolamine; PI, phosphatidylinositol; PS, phosphatidylserine; PG, phosphatidylglycerol; PA, phosphatidic acid; CL, cardiolipin; LPC, LPE, LPI, LPS, LPG, the corresponding lysolipids;
SM, sphingomyelin; Cer, ceramide; HexCer, hexosylceramide; LacCer, lactosylceramide; GM3, GM3 ganglioside.
DG, diacylglycerol; TG, triacylglycerol; CE, cholesteryl ester; GPC, glycerophosphocholine; PCho, phosphocholine; Carn, carnitine; AcCar, acylcarnitine.
